# Supplementary material for: Effect of Fibroblast Growth Factor 10 and an Interacting Non-Coding RNA on Secondary Hair Follicle Dermal Papilla Cells in Cashmere Goats’ Follicle Development Assessed by Whole-Transcriptome Sequencing Technology
Source: MDPI journal article supplement (doi:10.3390/ani13132234), 2023-07-07
Supplement: s1 [file s1]

Table S6 Primer sequences for qRT-PCR

| ID                                   | Name                               | Primer (5'-3')                                             | Product size |
|--------------------------------------|------------------------------------|------------------------------------------------------------|--------------|
| <i>ENSCHIG00</i><br><i>010000007</i> | <i>U6</i>                          | F: GCTTCGGCAGCACATATACTAAAAT<br>R: CGCTTCACGAATTTGCGTGTCAT | 50           |
| -                                    | <i>U6 RT</i>                       | CGCTTCACGAATTTGCGTGTCAT                                    | -            |
| <i>ENSCHIG00</i><br><i>000013316</i> | <i>β-actin</i>                     | F: ATCGTGATGGACTCCGGTGA<br>R: CCACGCTCCGTGAGAATCTT         | 140          |
| <i>ENSCHIG00</i><br><i>000007281</i> | <i>klf13</i>                       | F: GGGCTGCGAGAAAGTTTACG<br>R: GACGCTCTCCTGTGTGAGTT         | 71           |
| <i>ENSCHIG00</i><br><i>000009242</i> | <i>VEGFA</i>                       | F: TGC GGATCAAACCTCACCAA<br>R: CCTCGGCTTGTCACATCTTTC       | 119          |
| <i>ENSCHIG00</i><br><i>000021319</i> | <i>Colla1</i>                      | F: AGCCCTGGTGAAAATGGAGC<br>R: TTCACCCTTAGCACCCACAG         | 192          |
| <i>ENSCHIG00</i><br><i>000001082</i> | <i>KRT5</i>                        | F: ACGTCTGCTGAGGGAGTACC<br>R: AGCCTGAGGAAACGGTGTTTG        | 164          |
| <i>chi_circ_001</i><br><i>1012</i>   | <i>chi_circ_00</i><br><i>11012</i> | F: ACCATGGCCAACAATTCTGC<br>R: GTCTGGGACCCGTATGGCTG         | 162          |
| <i>chi_circ_006</i><br><i>5827</i>   | <i>chi_circ_00</i><br><i>65827</i> | F: AGGGGATGGGTGTGGATGTAA<br>R: GAGAGTGGGGGAATGAGACAC       | 199          |
| <i>chi_circ_000</i><br><i>0227</i>   | <i>chi_circ_00</i><br><i>00227</i> | F: GTCCCTCCTGCACCAAGAAA<br>R: AGGGCTCAAACACCCAGATT         | 179          |
| <i>chi_circ_003</i><br><i>5645</i>   | <i>chi_circ_00</i><br><i>35645</i> | F: TGTCTCTCAAGGCTGCTGTC<br>R: AGGGCATAATACAGTCACACCA       | 117          |
| <i>ENSCHIG00</i><br><i>010017178</i> | <i>FGF10</i>                       | F: TGTCTCTCAAGGCTGCTGTC<br>R: AGGGCATAATACAGTCACACCA       | 117          |

Bulge-loop<sup>TM</sup> miRNA qRT-PCR primers (each set consists of one reverse primer and one pair of qPCR primers) for miR-134, miR-24-3p, miR-214-3p, miR-200a, let-7b-5p and miR-184 expression assays were synthesized by Reebok.
