# Supplementary material for: Effect of Fibroblast Growth Factor 10 and an Interacting Non-Coding RNA on Secondary Hair Follicle Dermal Papilla Cells in Cashmere Goats’ Follicle Development Assessed by Whole-Transcriptome Sequencing Technology
Source: MDPI journal article supplement (doi:10.3390/ani13132234), 2023-07-07
Supplement: s1 [file s1]

Table S3 longRNA-seq sequencing data statistics

| Sample | Raw reads | Clean reads | N(%)   | Q20(%) | Q30(%) | GC(%) |
|--------|-----------|-------------|--------|--------|--------|-------|
| E75-1  | 130674098 | 129541578   | 0.0235 | 98.63  | 95.72  | 55.13 |
| E75-2  | 128856140 | 127880120   | 0.0236 | 98.59  | 95.63  | 53.99 |
| E75-3  | 130751966 | 129819626   | 0.0238 | 98.52  | 95.42  | 54.19 |
| E125-1 | 144366422 | 143366824   | 0.0235 | 98.65  | 95.7   | 51.71 |
| E125-2 | 142303864 | 141260588   | 0.0237 | 98.55  | 95.47  | 52.67 |
| E125-3 | 136188780 | 135220562   | 0.0237 | 98.56  | 95.5   | 53.39 |
