# Supplementary material for: Effect of Fibroblast Growth Factor 10 and an Interacting Non-Coding RNA on Secondary Hair Follicle Dermal Papilla Cells in Cashmere Goats’ Follicle Development Assessed by Whole-Transcriptome Sequencing Technology
Source: MDPI journal article supplement (doi:10.3390/ani13132234), 2023-07-07
Supplement: s1 [file s1]

Table S2 Primers for double luciferase reporter gene vectors

| Name                | Primer (5'-3')                           |
|---------------------|------------------------------------------|
| circRNA-0001141-WT  | F: <u>TCGA</u> AAGGCCAACACUGGAAUCCGUCCG  |
|                     | R: <u>CTAG</u> CGGACGGATTCCAGTGTTGGCCT   |
| circRNA-0001141-MUT | F: <u>TCGA</u> AAGGCCAACACUGGAACATAUAAG  |
|                     | R: <u>CTAG</u> CTTATATGTTCCAGTGTTGGCCT   |
| <i>FGF10</i> -WT-1  | F: <u>TCGA</u> GCTCTTCTTGGTGTCTTCCGTCCC  |
|                     | R: <u>CTAG</u> GGGACGGAAGACACCAAGAAGAGC  |
| <i>FGF10</i> -MUT-1 | F: <u>TCGA</u> GGTGAACATGCAGAGTAGGCAGGC  |
|                     | R: <u>CTAG</u> GCCTGCCTACTCTGCATGTTCAAC  |
| <i>FGF10</i> -WT-2  | F: <u>TCGA</u> TATCCTCAGCAGCTGCTCTCTGTTT |
|                     | R: <u>CTAG</u> AAACAGAGAGCAGCTGCTGAGGATA |
| <i>FGF10</i> -MUT-2 | F: <u>TCGA</u> TTAGGACAGGTCCTGCAGAGACAAT |
|                     | R: <u>CTAG</u> ATTGTCTCTGCAGGACCTGTCCTAA |
