# Supplementary material for: Effect of Fibroblast Growth Factor 10 and an Interacting Non-Coding RNA on Secondary Hair Follicle Dermal Papilla Cells in Cashmere Goats’ Follicle Development Assessed by Whole-Transcriptome Sequencing Technology
Source: MDPI journal article supplement (doi:10.3390/ani13132234), 2023-07-07
Supplement: s1 [file s1]

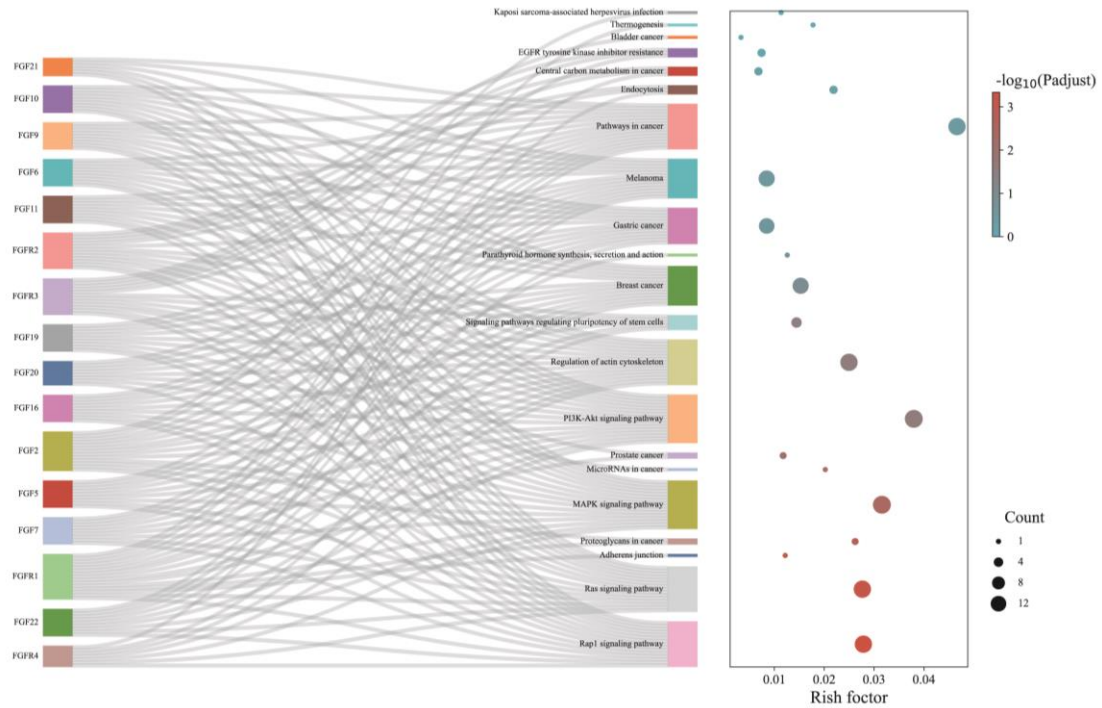

**Figure S3** Sankey bubble map of the FGF family. To further understand the role of the FGF family in hair follicle development, we generated a collection of transcripts of the differential FGF family and its receptors, and enrichment analysis showed that the family is highly enriched in cancer-related pathways and plays a role in the regulation of stem cell pluripotency, The enrichment of MAPK, PI3K-AKT, RAS, RAP1 and other pathways related to hair follicle development and regeneration suggests that the FGF family and its receptors are involved in the regulation of hair follicle processes.
