# Supplementary material for: Effect of Fibroblast Growth Factor 10 and an Interacting Non-Coding RNA on Secondary Hair Follicle Dermal Papilla Cells in Cashmere Goats’ Follicle Development Assessed by Whole-Transcriptome Sequencing Technology
Source: MDPI journal article supplement (doi:10.3390/ani13132234), 2023-07-07
Supplement: s1 [file s1]

Table S1 Primers for vectors construction

| Name                     | Primer (5'-3')                                                     |
|--------------------------|--------------------------------------------------------------------|
| <i>FGF10</i>             | F:cgcGGATCCATGTGGAAATGGATTCTGAC<br>R:ccgGAATTCCTATGAGTGTACCACCATTG |
| siRNA- <i>FGF10</i> -220 | F:GUUGCUGUGAAAGCUAUUATT<br>R:UAAUAGCUUUCACAGCAACTT                 |
| siRNA- <i>FGF10</i> -273 | F:CCAAGUACUUUCUCAAGAATT<br>R:AUCUUGAGAAAGUACUUGGTT                 |
| siRNA- <i>FGF10</i> -374 | F:GAGCUACAAUCACCUCCAATT<br>R:UUGGAGGUGAUUGUAGCUCTT                 |
| <i>FGF10</i> -siRNA-NC   | F:UUCUCCGAACGUGUCACGUTT<br>R:ACGUGACACGUUCGGAGAATT                 |
| miR-184 mimics           | F:UGGACGGAGAACUGAUAAGGGU<br>R:CCUUAUCAGUUCUCCGUCCAUI               |
| miR-184 mimics NC        | F:UUCUCCGAACGUGUCACGUTT<br>R:ACGUGACACGUUCGGAGAATT                 |
| miR-184 inhibitors       | F:ACCCUUAUCAGUUCUCCGUCCA                                           |
| miR-184 inhibitors NC    | F:CAGUACUUUUGUGUAGUACAA                                            |
