# Supplementary material for: Effect of Fibroblast Growth Factor 10 and an Interacting Non-Coding RNA on Secondary Hair Follicle Dermal Papilla Cells in Cashmere Goats’ Follicle Development Assessed by Whole-Transcriptome Sequencing Technology
Source: MDPI journal article supplement (doi:10.3390/ani13132234), 2023-07-07
Supplement: s1 [file s1]

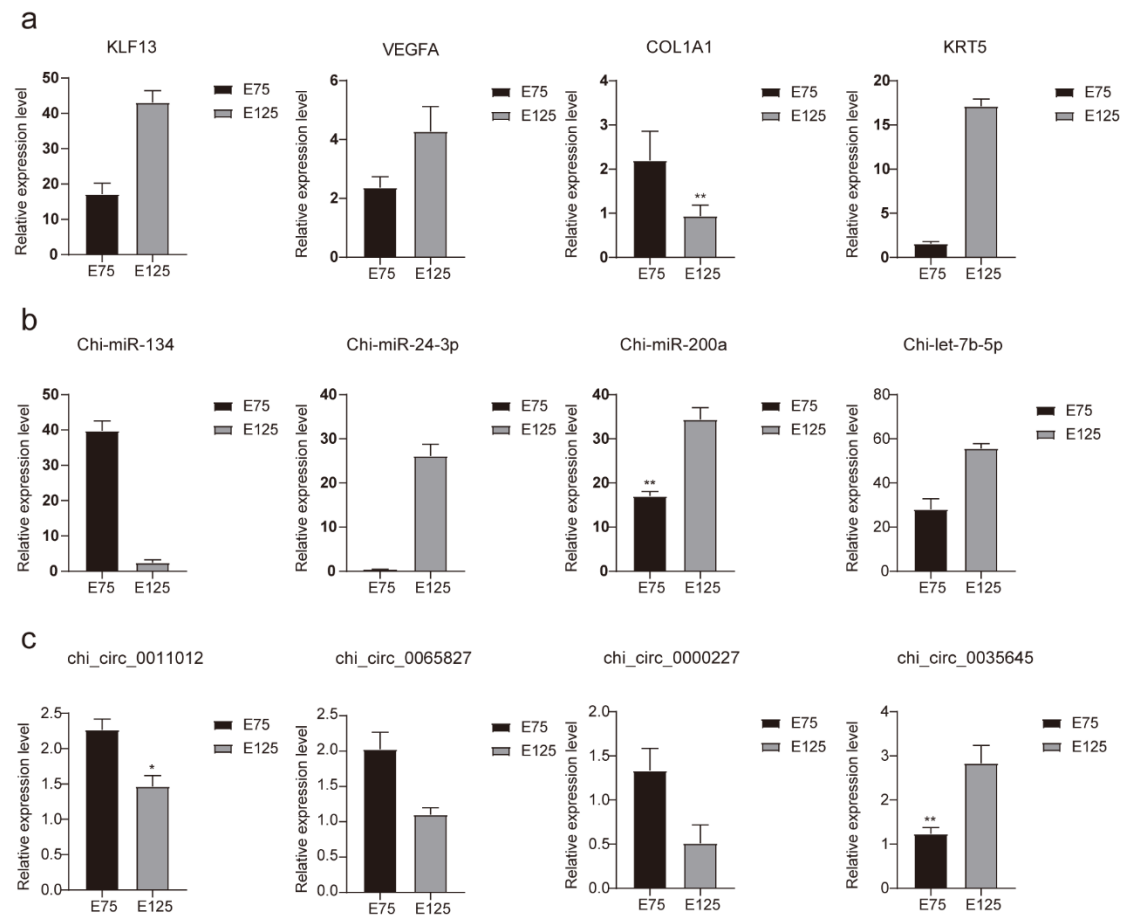

**Figure S5** qRT-PCR validation. (a) mRNA; (b) miRNA; (c) circRNA. The abscissa is grouped for E75 and E125, and the ordinate is the relative expression.
