# Supplementary material for: Effect of Fibroblast Growth Factor 10 and an Interacting Non-Coding RNA on Secondary Hair Follicle Dermal Papilla Cells in Cashmere Goats’ Follicle Development Assessed by Whole-Transcriptome Sequencing Technology
Source: MDPI journal article supplement (doi:10.3390/ani13132234), 2023-07-07
Supplement: s1 [file s1]

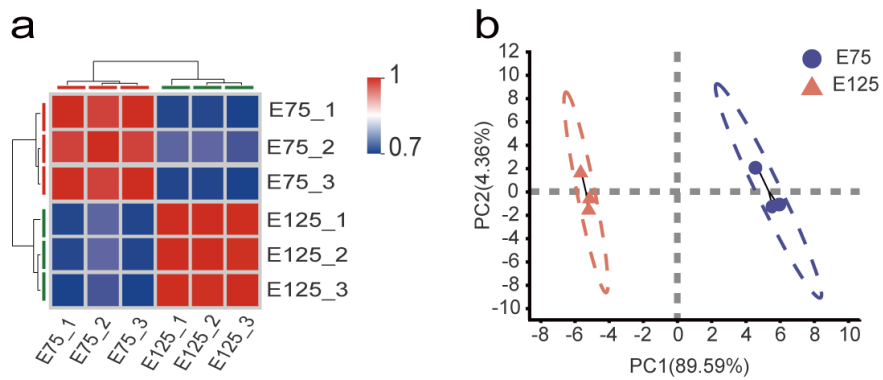

**Figure S1** (a) Correlation analysis. The clustering of each group is shown on the left and top. The different colour squares represent the high correlation between the two samples, where larger values indicate a higher correlation between the two samples. (b) Principal component analysis (PCA). The distance of each sample point represents the distance between samples; the closer the distance the higher the similarity between samples, indicating better biological replication between samples.
