# Supplementary material for: Effect of Fibroblast Growth Factor 10 and an Interacting Non-Coding RNA on Secondary Hair Follicle Dermal Papilla Cells in Cashmere Goats’ Follicle Development Assessed by Whole-Transcriptome Sequencing Technology
Source: MDPI journal article supplement (doi:10.3390/ani13132234), 2023-07-07
Supplement: s1 [file s1]

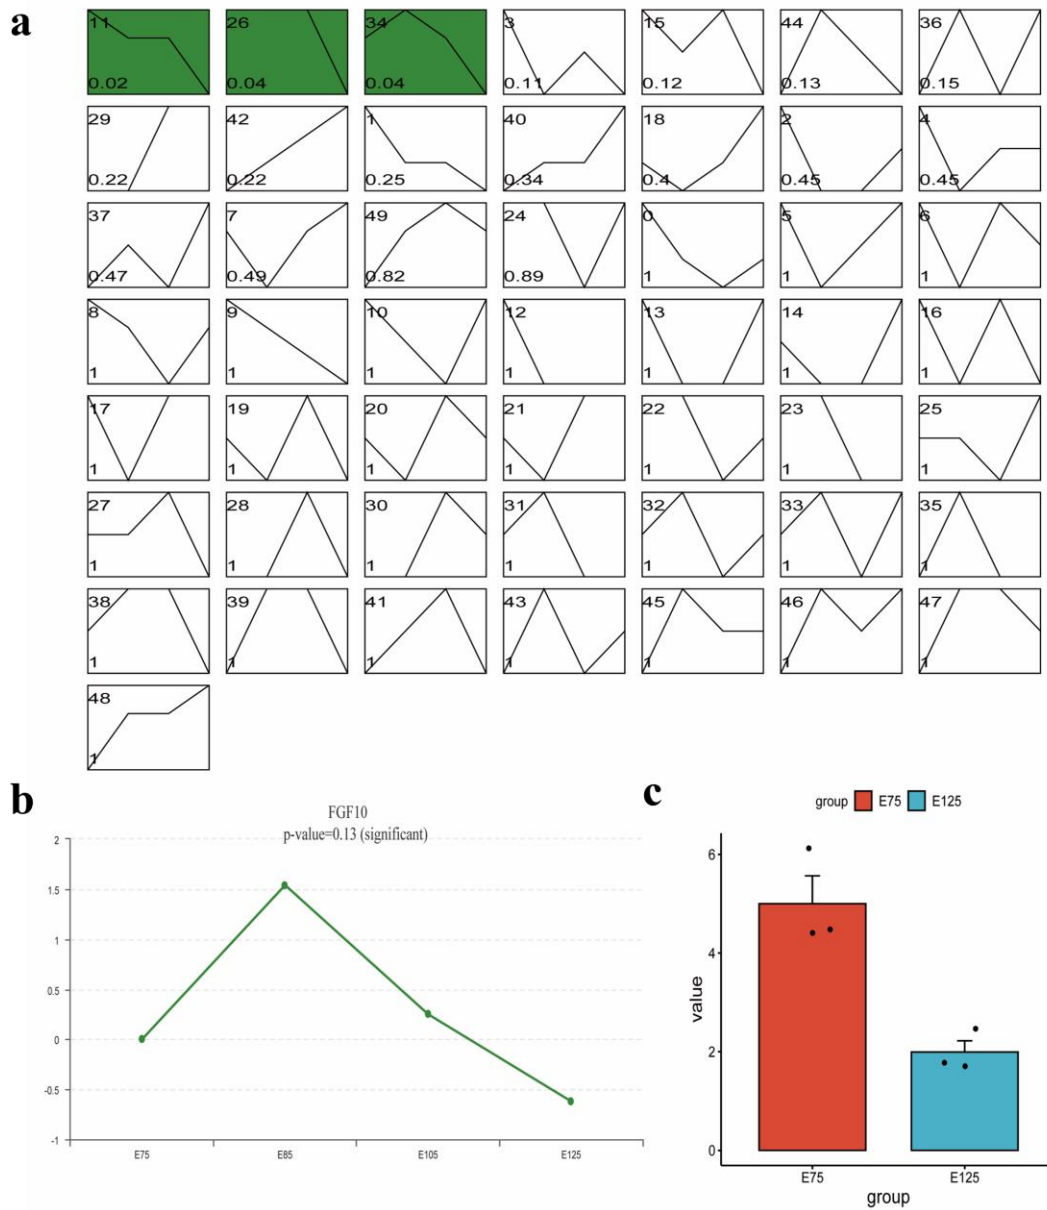

**Figure S4** FGF10 expression analysis. **(a)** Temporal analysis of the differential FGF family and its receptor transcript collection showed significant enrichment in three expression patterns ( $P < 0.05$ ); **(b)** dynamic trends in FGF10 expression; **(c)** differential expression analysis showed that FGF10 was more highly expressed at E75 than at E125, and the differential expression was significant.
