# Supplementary material for: Effect of Fibroblast Growth Factor 10 and an Interacting Non-Coding RNA on Secondary Hair Follicle Dermal Papilla Cells in Cashmere Goats’ Follicle Development Assessed by Whole-Transcriptome Sequencing Technology
Source: MDPI journal article supplement (doi:10.3390/ani13132234), 2023-07-07
Supplement: s1 [file s1]

Table S4 smallRNA-seq sequencing data statistics

| Sample | Raw reads | Clean reads | N(%)   | Q20(%) | Q30(%) | GC(%) |
|--------|-----------|-------------|--------|--------|--------|-------|
| E75-1  | 14513270  | 14177178    | 0.0232 | 98.77  | 95.96  | 42.71 |
| E75-2  | 15997736  | 15455878    | 0.023  | 98.84  | 96.22  | 43.56 |
| E75-3  | 15372318  | 14977603    | 0.0237 | 98.46  | 95.5   | 42.76 |
| E125-1 | 14629622  | 14066324    | 0.0236 | 98.58  | 95.58  | 44.93 |
| E125-2 | 14110152  | 13675726    | 0.0232 | 98.76  | 95.98  | 44.95 |
| E125-3 | 17292026  | 16692307    | 0.0231 | 98.77  | 96.15  | 45.36 |
