# Supplementary material for: Effect of Fibroblast Growth Factor 10 and an Interacting Non-Coding RNA on Secondary Hair Follicle Dermal Papilla Cells in Cashmere Goats’ Follicle Development Assessed by Whole-Transcriptome Sequencing Technology
Source: Animals (Basel). 2023 Jul 7;13(13):2234. doi: 10.3390/ani13132234 (PMC10340072; doi:10.3390/ani13132234)
Supplement: Supplementary file 1 [file animals-13-02234-s001.zip › Supplementary Table S5.xlsx]

## Sheet: miRNA -靶RNA对应关系表 (7)(1)
Table S5 The data base of the ceRNA regulatory network
miRNA	Target transcript id	Target RNA type	Target gene id	Target gene name	Target gene description	Corr	pvalue	padjust	miRTarBase
chi-miR-196b	12_40062027_40121789	circRNA	ENSCHIG00000003476	DACH1	dachshund family transcription factor 1 [Source:NCBI gene;Acc:102178371]	-0.600905	0.0387904	0.0712162	no
chi-miR-3955-3p	21_41963748_41989094	circRNA	ENSCHIG00000010874	ARHGAP5	Rho GTPase activating protein 5 [Source:NCBI gene;Acc:102178574]	-0.70336	0.0107081	0.0290536	no
chi-miR-504	8_112475884_112495957	circRNA	ENSCHIG00000023106	SH3YL1	SH3 and SYLF domain containing 1 [Source:NCBI gene;Acc:102186310]	-0.786601	0.00240525	0.012081	no
chi-miR-497-5p	7_172120_230877	circRNA	ENSCHIG00000011930	CAMK4	calcium/calmodulin dependent protein kinase IV [Source:NCBI gene;Acc:102187484]	-0.657343	0.0201855	0.0449851	no
chi-miR-29c-5p	11_96714402_96756768	circRNA	ENSCHIG00000013327	MVB12B	multivesicular body subunit 12B [Source:NCBI gene;Acc:102187499]	-0.704029	0.0106012	0.0287848	no
chi-miR-3431-5p	3_85693064_85709217	circRNA				-0.82663	0.000914801	0.00690982	no
chi-miR-125a-5p	19_41224843_41264566	circRNA				-0.734316	0.00653792	0.0208088	no
chi-miR-27a-5p	16_62008118_62074761	circRNA				-0.842184	0.00058779	0.00558527	no
chi-miR-27a-5p	13_33179100_33272240	circRNA	ENSCHIG00000016385	ZEB1	zinc finger E-box binding homeobox 1 [Source:NCBI gene;Acc:106502734]	-0.713287	0.00920178	0.0258316	no
chi-miR-487a-5p	1_19404630_19454650	circRNA				-0.69406	0.0122789	0.0320631	no
chi-miR-1197-3p	17_1790475_1833570	circRNA				-0.725137	0.00761729	0.0227305	no
chi-miR-485-5p	4_41207111_41254724	circRNA	ENSCHIG00000015297	GLI3	GLI family zinc finger 3 [Source:NCBI gene;Acc:102178142]	-0.746867	0.00525314	0.0186772	no
chi-miR-34c-5p	17_1790475_1833570	circRNA				-0.734316	0.00653792	0.0208088	no
chi-miR-146b-3p	23_44481243_44498990	circRNA	ENSCHIG00000023311			-0.783217	0.00258622	0.0125455	no
chi-miR-135b-5p	12_35520126_35550205	circRNA	ENSCHIG00000005312	LMO7	LIM domain 7 [Source:NCBI gene;Acc:102182606]	-0.653192	0.0212685	0.0469558	no
chi-miR-200a	22_10308020_10312570	circRNA	ENSCHIG00000021299	LRRFIP2	LRR binding FLII interacting protein 2 [Source:NCBI gene;Acc:102180895]	-0.787598	0.00235387	0.0118469	no
chi-miR-3431-3p	5_27299842_27329315	circRNA				-0.752674	0.00472788	0.0174375	no
chi-miR-34a	24_23828087_23885973	circRNA	ENSCHIG00000000206	ASXL3	ASXL transcriptional regulator 3 [Source:NCBI gene;Acc:102185524]	-0.775872	0.00301455	0.0137592	no
chi-miR-383	12_40062027_40121789	circRNA	ENSCHIG00000003476	DACH1	dachshund family transcription factor 1 [Source:NCBI gene;Acc:102178371]	-0.645693	0.0233316	0.050128	no
chi-miR-365-3p	5_105662044_105677440	circRNA				-0.578304	0.0488702	0.0844968	no
chi-miR-34c-5p	22_44277031_44317361	circRNA	ENSCHIG00000018878,ENSCHIG00000025264	TASOR,CCDC66		-0.685315	0.013906	0.0344654	no
chi-miR-502b-3p	1_19404630_19454650	circRNA				-0.658467	0.0198991	0.0449851	no
chi-miR-211	17_53520080_53522215	circRNA				-0.761853	0.00397973	0.0162346	no
chi-miR-93-5p	5_33471247_33488926	circRNA				-0.781087	0.0027053	0.0129429	no
chi-miR-485-5p	9_7171167_7174760	circRNA	ENSCHIG00000006319	BCKDHB	branched chain keto acid dehydrogenase E1 subunit beta [Source:NCBI gene;Acc:102171071]	-0.700526	0.0111699	0.0299838	no
chi-miR-338-3p	7_106074945_106081450	circRNA	ENSCHIG00000026141	OBSCN	obscurin, cytoskeletal calmodulin and titin-interacting RhoGEF [Source:NCBI gene;Acc:106502252]	-0.665674	0.0181341	0.0422341	no
chi-miR-708-3p	7_172120_202865	circRNA	ENSCHIG00000011930	CAMK4	calcium/calmodulin dependent protein kinase IV [Source:NCBI gene;Acc:102187484]	-0.823964	0.000982639	0.00710579	no
chi-miR-93-5p	5_87769796_87780399	circRNA	ENSCHIG00000025590	PDE3A	phosphodiesterase 3A [Source:NCBI gene;Acc:102168704]	-0.825175	0.000951363	0.00690982	no
chi-miR-130b-3p	3_75922095_75973157	circRNA	ENSCHIG00000017438		sorting nexin 7 [Source:NCBI gene;Acc:102180557]	-0.65035	0.0220342	0.0476499	no
chi-miR-378-5p	19_41224843_41264566	circRNA				-0.761853	0.00397973	0.0162346	no
chi-miR-128-3p	19_41243691_41317024	circRNA				-0.734316	0.00653792	0.0208088	no
chi-miR-497-5p	7_14146902_14183277	circRNA	ENSCHIG00000012539	LNPEP	leucyl and cystinyl aminopeptidase [Source:NCBI gene;Acc:102186394]	-0.913643	3.27e-05	0.00120733	no
chi-miR-100-3p	3_72167775_72194318	circRNA	ENSCHIG00000024345		transmembrane protein 56 [Source:NCBI gene;Acc:102182748]	-0.686749	0.0136288	0.0344654	no
chi-miR-193a	24_23828087_23885973	circRNA	ENSCHIG00000000206	ASXL3	ASXL transcriptional regulator 3 [Source:NCBI gene;Acc:102185524]	-0.841132	0.000606506	0.00565106	no
chi-miR-34a	22_58305714_58404500	circRNA				-0.846154	0.000521134	0.00507581	no
chi-miR-34b-3p	26_11416825_11423745	circRNA	ENSCHIG00000013810	PLPP4	phospholipid phosphatase 4 [Source:NCBI gene;Acc:102169156]	-0.753931	0.0046196	0.0174375	no
chi-miR-378-5p	19_41243691_41317024	circRNA				-0.752674	0.00472788	0.0174375	no
chi-let-7b-5p	22_58305714_58404500	circRNA				-0.825175	0.000951363	0.00690982	no
chi-miR-487b-3p	17_1790475_1811077	circRNA				-0.734316	0.00653792	0.0208088	no
chi-miR-24-3p	5_12285972_12338205	circRNA	ENSCHIG00000021548	TMTC2	transmembrane and tetratricopeptide repeat containing 2 [Source:NCBI gene;Acc:102190760]	-0.622378	0.0306759	0.0602888	no
chi-miR-128-3p	10_56624085_56628179	circRNA	ENSCHIG00000019905		ubiquitin specific peptidase 3 [Source:NCBI gene;Acc:102170701]	-0.748252	0.00512408	0.0182641	no
chi-miR-145-3p	7_14146902_14183277	circRNA	ENSCHIG00000012539	LNPEP	leucyl and cystinyl aminopeptidase [Source:NCBI gene;Acc:102186394]	-0.761369	0.00401672	0.0163318	no
chi-miR-758	12_40062027_40121789	circRNA	ENSCHIG00000003476	DACH1	dachshund family transcription factor 1 [Source:NCBI gene;Acc:102178371]	-0.821113	0.00105943	0.007581	no
chi-miR-221-3p	19_18405450_18435938	circRNA	ENSCHIG00000010629	NF1	neurofibromin 1 [Source:NCBI gene;Acc:102183001]	-0.81879	0.00112535	0.00771266	no
chi-miR-3955-3p	19_41224623_41317024	circRNA				-0.752674	0.00472788	0.0174375	no
chi-miR-19b-5p	18_21745096_21775026	circRNA	ENSCHIG00000014739	NETO2	neuropilin and tolloid like 2 [Source:NCBI gene;Acc:102182820]	-0.78171	0.00267007	0.0128393	no
chi-miR-17-5p	29_28684057_28729825	circRNA	ENSCHIG00000006678	CDON	cell adhesion associated, oncogene regulated [Source:NCBI gene;Acc:102188923]	-0.783217	0.00258622	0.0125455	no
chi-miR-146b-5p	19_18405450_18435938	circRNA	ENSCHIG00000010629	NF1	neurofibromin 1 [Source:NCBI gene;Acc:102183001]	-0.748608	0.00509129	0.0182641	no
chi-miR-378-5p	8_112475884_112495957	circRNA	ENSCHIG00000023106	SH3YL1	SH3 and SYLF domain containing 1 [Source:NCBI gene;Acc:102186310]	-0.854228	0.000403724	0.00442648	no
chi-miR-485-5p	13_6662199_6686474	circRNA	ENSCHIG00000011776	ISM1	isthmin 1 [Source:NCBI gene;Acc:102184352]	-0.853147	0.000418118	0.00442648	no
chi-miR-532-5p	19_41264441_41317024	circRNA				-0.752674	0.00472788	0.0174375	no
chi-miR-20a-5p	6_2399934_2465968	circRNA				-0.752674	0.00472788	0.0174375	no
chi-miR-493-5p	17_1790475_1833570	circRNA				-0.734316	0.00653792	0.0208088	no
chi-miR-504	17_1790475_1811077	circRNA				-0.761853	0.00397973	0.0162346	no
chi-miR-329b-3p	7_30508968_30606262	circRNA	ENSCHIG00000025474		teneurin-2 [Source:NCBI gene;Acc:108633191]	-0.776325	0.00298666	0.0137075	no
chi-miR-193b-3p	2_29711456_29798577	circRNA				-0.787522	0.00235775	0.0118485	no
chi-miR-504	1_146914668_146941336	circRNA	ENSCHIG00000016792	RUNX1	runt related transcription factor 1 [Source:NCBI gene;Acc:102178020]	-0.741259	0.00580115	0.0197721	no
chi-miR-34a	11_96714402_96756768	circRNA	ENSCHIG00000013327	MVB12B	multivesicular body subunit 12B [Source:NCBI gene;Acc:102187499]	-0.777584	0.00291017	0.0137075	no
chi-miR-200a	13_33179100_33272240	circRNA	ENSCHIG00000016385	ZEB1	zinc finger E-box binding homeobox 1 [Source:NCBI gene;Acc:106502734]	-0.79021	0.00222314	0.0113699	no
chi-miR-125a-5p	19_41224623_41264269	circRNA				-0.725137	0.00761729	0.0227305	no
chi-miR-221-3p	10_96324160_96341261	circRNA	ENSCHIG00000025037	LVRN	laeverin [Source:NCBI gene;Acc:102185571]	-0.74389	0.00553894	0.0194963	no
chi-miR-221-5p	4_28177351_28196356	circRNA	ENSCHIG00000023390	SND1	staphylococcal nuclease and tudor domain containing 1 [Source:NCBI gene;Acc:102172121]	-0.717863	0.00856333	0.0247067	no
chi-miR-145-5p	2_51163786_51203156	circRNA	ENSCHIG00000012868	HECW2	HECT, C2 and WW domain containing E3 ubiquitin protein ligase 2 [Source:NCBI gene;Acc:102169918]	-0.685315	0.013906	0.0344654	no
chi-miR-532-5p	9_15671584_15680484	circRNA	ENSCHIG00000021420	SMPDL3A	sphingomyelin phosphodiesterase acid like 3A [Source:NCBI gene;Acc:102191799]	-0.676264	0.0157521	0.0378821	no
chi-miR-214-3p	19_41224843_41264566	circRNA				-0.752674	0.00472788	0.0174375	no
chi-miR-410-3p	19_41224623_41264269	circRNA				-0.725137	0.00761729	0.0227305	no
chi-miR-3431-5p	19_40625362_40635698	circRNA				-0.769685	0.00341549	0.0150422	no
chi-miR-135a	28_7042267_7045526	circRNA				-0.752674	0.00472788	0.0174375	no
chi-miR-27b-3p	7_14146902_14183277	circRNA	ENSCHIG00000012539	LNPEP	leucyl and cystinyl aminopeptidase [Source:NCBI gene;Acc:102186394]	-0.949899	2.28e-06	0.000317169	no
chi-miR-125a-5p	7_30508968_30606262	circRNA	ENSCHIG00000025474		teneurin-2 [Source:NCBI gene;Acc:108633191]	-0.589708	0.0435783	0.0779446	no
chi-miR-376c-5p	17_1790475_1811077	circRNA				-0.752674	0.00472788	0.0174375	no
chi-miR-146b-3p	2_29711456_29798577	circRNA				-0.798719	0.00183541	0.0103462	no
chi-miR-323a-3p	6_68272249_68299586	circRNA	ENSCHIG00000024006	DCUN1D4	defective in cullin neddylation 1 domain containing 4 [Source:NCBI gene;Acc:102178894]	-0.734266	0.00654349	0.0208088	no
chi-miR-767	23_24033577_24076325	circRNA				-0.653192	0.0212685	0.0469558	no
chi-miR-329a-3p	7_30508968_30606262	circRNA	ENSCHIG00000025474		teneurin-2 [Source:NCBI gene;Acc:108633191]	-0.72034	0.00823184	0.0240034	no
chi-miR-432-5p	5_27299842_27329315	circRNA				-0.752674	0.00472788	0.0174375	no
chi-miR-500-5p	3_71250442_71278523	circRNA	ENSCHIG00000011428	ARHGAP29	Rho GTPase activating protein 29 [Source:NCBI gene;Acc:102185622]	-0.594406	0.0415215	0.0747889	no
chi-miR-200a	11_96714402_96756768	circRNA	ENSCHIG00000013327	MVB12B	multivesicular body subunit 12B [Source:NCBI gene;Acc:102187499]	-0.777584	0.00291017	0.0137075	no
chi-miR-758	3_85693064_85709217	circRNA				-0.855634	0.000385575	0.00442408	no
chi-miR-338-3p	7_172120_202865	circRNA	ENSCHIG00000011930	CAMK4	calcium/calmodulin dependent protein kinase IV [Source:NCBI gene;Acc:102187484]	-0.683116	0.014339	0.0354035	no
chi-miR-188-5p	9_2488189_2504251	circRNA	ENSCHIG00000009406	SENP6	SUMO specific peptidase 6 [Source:NCBI gene;Acc:102188944]	-0.699301	0.0113742	0.0299838	no
chi-miR-34b-3p	19_41264441_41317024	circRNA				-0.761853	0.00397973	0.0162346	no
chi-miR-17-5p	1_7833330_7845998	circRNA	ENSCHIG00000018986	ADAMTS5	ADAM metallopeptidase with thrombospondin type 1 motif 5 [Source:NCBI gene;Acc:102172097]	-0.79021	0.00222314	0.0113699	no
chi-miR-532-5p	8_55432434_55460431	circRNA	ENSCHIG00000019651	TLE4	TLE family member 4, transcriptional corepressor [Source:NCBI gene;Acc:102171243]	-0.761853	0.00397973	0.0162346	no
chi-miR-135b-5p	7_106074945_106082030	circRNA	ENSCHIG00000026141	OBSCN	obscurin, cytoskeletal calmodulin and titin-interacting RhoGEF [Source:NCBI gene;Acc:106502252]	-0.725214	0.00760775	0.0227305	no
chi-miR-23a	5_30305142_30343396	circRNA				-0.833626	0.000753851	0.00623472	no
chi-miR-767	19_41243691_41317024	circRNA				-0.734316	0.00653792	0.0208088	no
chi-miR-338-3p	2_107548050_107575268	circRNA				-0.679511	0.0150702	0.0368991	no
chi-let-7g-3p	19_18405450_18435938	circRNA	ENSCHIG00000010629	NF1	neurofibromin 1 [Source:NCBI gene;Acc:102183001]	-0.81879	0.00112535	0.00771266	no
chi-miR-146b-5p	6_114513010_114525156	circRNA	ENSCHIG00000019315	ABLIM2	actin binding LIM protein family member 2 [Source:NCBI gene;Acc:102176216]	-0.694022	0.0122857	0.0320631	no
chi-miR-34c-5p	17_1790475_1811077	circRNA				-0.725137	0.00761729	0.0227305	no
chi-miR-135b-5p	12_35520126_35552054	circRNA	ENSCHIG00000005312	LMO7	LIM domain 7 [Source:NCBI gene;Acc:102182606]	-0.787598	0.00235387	0.0118469	no
chi-miR-135b-5p	1_7833330_7845998	circRNA	ENSCHIG00000018986	ADAMTS5	ADAM metallopeptidase with thrombospondin type 1 motif 5 [Source:NCBI gene;Acc:102172097]	-0.776224	0.00299286	0.0137075	no
chi-miR-146b-5p	24_10984009_11000039	circRNA	ENSCHIG00000016363	CDH7	cadherin 7 [Source:NCBI gene;Acc:102169638]	-0.706294	0.0102452	0.0279658	no
chi-miR-141	14_12624379_12660440	circRNA				-0.647903	0.0227091	0.0488963	no
chi-miR-29a-3p	18_21745096_21775026	circRNA	ENSCHIG00000014739	NETO2	neuropilin and tolloid like 2 [Source:NCBI gene;Acc:102182820]	-0.929601	1.21e-05	0.000722885	no
chi-miR-195-3p	21_23975771_23990240	circRNA	ENSCHIG00000016013	SH3GL3	SH3 domain containing GRB2 like 3, endophilin A3 [Source:NCBI gene;Acc:102168209]	-0.95777	9.85e-07	0.000203713	no
chi-miR-24-5p	LWLT01000042.1_310269_326220	circRNA	ENSCHIG00000000152	MAPK1	mitogen-activated protein kinase 1 [Source:NCBI gene;Acc:102186040]	-0.804196	0.00161477	0.00939149	no
chi-miR-145-3p	7_172120_230877	circRNA	ENSCHIG00000011930	CAMK4	calcium/calmodulin dependent protein kinase IV [Source:NCBI gene;Acc:102187484]	-0.608392	0.035806	0.0671753	no
chi-miR-424-3p	3_71250442_71278523	circRNA	ENSCHIG00000011428	ARHGAP29	Rho GTPase activating protein 29 [Source:NCBI gene;Acc:102185622]	-0.636364	0.0260969	0.0536812	no
chi-miR-221-3p	19_14385907_14397043	circRNA	ENSCHIG00000019283		adaptor related protein complex 2 subunit beta 1 [Source:NCBI gene;Acc:102172093]	-0.733012	0.00668381	0.0211851	no
chi-miR-125b-5p	19_41224623_41317024	circRNA				-0.725137	0.00761729	0.0227305	no
chi-miR-17-5p	16_43412593_43466290	circRNA	ENSCHIG00000025014	RERE	arginine-glutamic acid dipeptide repeats [Source:NCBI gene;Acc:102178646]	-0.658495	0.0198921	0.0449851	no
chi-miR-195-3p	21_63533632_63560955	circRNA	ENSCHIG00000019860	BCL11B	BCL11B, BAF complex component [Source:NCBI gene;Acc:102177104]	-0.816922	0.00118061	0.00790922	no
chi-miR-188-5p	2_111987328_111999238	circRNA				-0.734316	0.00653792	0.0208088	no
chi-miR-497-5p	13_33179100_33272240	circRNA	ENSCHIG00000016385	ZEB1	zinc finger E-box binding homeobox 1 [Source:NCBI gene;Acc:106502734]	-0.755245	0.00450843	0.0174375	no
chi-miR-146b-5p	22_28687216_28699682	circRNA	ENSCHIG00000011713	GXYLT2	glucoside xylosyltransferase 2 [Source:NCBI gene;Acc:102169917]	-0.704738	0.0104888	0.0285797	no
chi-miR-145-3p	7_84193926_84212544	circRNA	ENSCHIG00000026659	PRRC1	proline rich coiled-coil 1 [Source:NCBI gene;Acc:102185173]	-0.699301	0.0113742	0.0299838	no
chi-miR-27a-3p	22_28687216_28699682	circRNA	ENSCHIG00000011713	GXYLT2	glucoside xylosyltransferase 2 [Source:NCBI gene;Acc:102169917]	-0.875583	0.000189842	0.00307419	no
chi-miR-135b-5p	10_91508829_91592619	circRNA	ENSCHIG00000014180	LHFPL2	LHFPL tetraspan subfamily member 2 [Source:NCBI gene;Acc:102189127]	-0.788752	0.00229539	0.011665	no
chi-miR-338-3p	5_20846275_20862392	circRNA	ENSCHIG00000018030	DCN	decorin [Source:NCBI gene;Acc:100860944]	-0.58042	0.047856	0.0829136	no
chi-miR-145-3p	2_29711456_29798577	circRNA				-0.847239	0.000503977	0.00507581	no
chi-miR-146b-3p	16_62008118_62074761	circRNA				-0.787598	0.00235387	0.0118469	no
chi-miR-412-3p	23_24033577_24076325	circRNA				-0.703118	0.0107471	0.0291315	no
chi-miR-146b-5p	29_28684057_28729825	circRNA	ENSCHIG00000006678	CDON	cell adhesion associated, oncogene regulated [Source:NCBI gene;Acc:102188923]	-0.657343	0.0201855	0.0449851	no
chi-miR-296-3p	19_41224623_41317024	circRNA				-0.725137	0.00761729	0.0227305	no
chi-miR-502b-3p	19_41224623_41317024	circRNA				-0.752674	0.00472788	0.0174375	no
chi-miR-27a-3p	2_29711456_29798577	circRNA				-0.850971	0.000448294	0.00468596	no
chi-miR-29a-5p	19_44164067_44165653	circRNA				-0.594406	0.0415215	0.0747889	no
chi-miR-145-3p	24_42654784_42656566	circRNA	ENSCHIG00000010227		piezo type mechanosensitive ion channel component 2 [Source:NCBI gene;Acc:102178229]	-0.664336	0.0184527	0.0422524	no
chi-miR-200c	19_17783114_17803011	circRNA	ENSCHIG00000021351	CRLF3	cytokine receptor like factor 3 [Source:NCBI gene;Acc:102188795]	-0.64423	0.0237505	0.0507254	no
chi-miR-485-5p	5_27299842_27329315	circRNA				-0.725137	0.00761729	0.0227305	no
chi-miR-34c-5p	19_41224623_41317024	circRNA				-0.761853	0.00397973	0.0162346	no
chi-miR-146b-5p	16_69271526_69272417	circRNA	ENSCHIG00000011863	VASH2	vasohibin 2 [Source:NCBI gene;Acc:102180692]	-0.615385	0.0331699	0.0636096	no
chi-miR-27b-3p	2_29711456_29798577	circRNA				-0.843507	0.000564883	0.00541687	no
chi-miR-214-3p	4_33600215_33618663	circRNA	ENSCHIG00000009703	AASS	aminoadipate-semialdehyde synthase [Source:NCBI gene;Acc:102185894]	-0.762238	0.00395045	0.0162346	no
chi-miR-543-5p	8_55432434_55460431	circRNA	ENSCHIG00000019651	TLE4	TLE family member 4, transcriptional corepressor [Source:NCBI gene;Acc:102171243]	-0.660884	0.0192937	0.0439046	no
chi-miR-24-3p	23_32008875_32016615	circRNA				-0.725137	0.00761729	0.0227305	no
chi-miR-378-3p	LWLT01000264.1_21229_27916	circRNA				-0.755245	0.00450843	0.0174375	no
chi-miR-487b-5p	3_3505853_3508695	circRNA	ENSCHIG00000006587		LRR binding FLII interacting protein 1 [Source:NCBI gene;Acc:102170479]	-0.804196	0.00161477	0.00939149	no
chi-miR-376c-5p	17_1790475_1833570	circRNA				-0.734316	0.00653792	0.0208088	no
chi-miR-27b-5p	3_119473360_119499163	circRNA	ENSCHIG00000024329	DCAF6	DDB1 and CUL4 associated factor 6 [Source:NCBI gene;Acc:102172777]	-0.870137	0.000232967	0.00344077	no
chi-miR-125a-5p	2_111987328_111999238	circRNA				-0.752674	0.00472788	0.0174375	no
chi-miR-497-5p	27_26263263_26281959	circRNA	ENSCHIG00000018661	PCM1	pericentriolar material 1 [Source:NCBI gene;Acc:102191676]	-0.657343	0.0201855	0.0449851	no
chi-miR-145-5p	2_29711456_29798577	circRNA				-0.612102	0.0343893	0.0656372	no
chi-miR-497-5p	10_91508829_91592619	circRNA	ENSCHIG00000014180	LHFPL2	LHFPL tetraspan subfamily member 2 [Source:NCBI gene;Acc:102189127]	-0.683116	0.014339	0.0354035	no
chi-miR-125b-5p	15_78002037_78006800	circRNA	ENSCHIG00000006770	PDGFD	platelet derived growth factor D [Source:NCBI gene;Acc:102168651]	-0.594406	0.0415215	0.0747889	no
chi-miR-193a	23_42333788_42406135	circRNA	ENSCHIG00000020109			-0.85778	0.000359119	0.00414931	no
chi-miR-376b-5p	17_1790475_1833570	circRNA				-0.734316	0.00653792	0.0208088	no
chi-miR-34c-5p	3_85693064_85709217	circRNA				-0.870137	0.000232967	0.00344077	no
chi-miR-432-5p	11_30388771_30408264	circRNA				-0.725137	0.00761729	0.0227305	no
chi-miR-323a-3p	1_146914668_146941336	circRNA	ENSCHIG00000016792	RUNX1	runt related transcription factor 1 [Source:NCBI gene;Acc:102178020]	-0.811189	0.00136331	0.00845946	no
chi-miR-1197-3p	19_41224623_41317024	circRNA				-0.752674	0.00472788	0.0174375	no
chi-miR-338-3p	7_106074945_106082030	circRNA	ENSCHIG00000026141	OBSCN	obscurin, cytoskeletal calmodulin and titin-interacting RhoGEF [Source:NCBI gene;Acc:106502252]	-0.772002	0.00326088	0.0147211	no
chi-miR-378-3p	5_43950436_43963546	circRNA	ENSCHIG00000010792	CPSF6	cleavage and polyadenylation specific factor 6 [Source:NCBI gene;Acc:102186747]	-0.853147	0.000418118	0.00442648	no
chi-miR-3431-5p	18_37371228_37380440	circRNA	ENSCHIG00000018029	CDH1	cadherin 1 [Source:NCBI gene;Acc:102170451]	-0.818182	0.0011431	0.00771266	no
chi-miR-184	6_67622313_67629625	circRNA	ENSCHIG00000013405	SLAIN2	SLAIN motif family member 2 [Source:NCBI gene;Acc:102189565]	-0.580163	0.0479782	0.0830963	no
chi-miR-214-3p	8_27506440_27547321	circRNA	ENSCHIG00000026061	BNC2	basonuclin 2 [Source:NCBI gene;Acc:102186591]	-0.636364	0.0260969	0.0536812	no
chi-miR-188-5p	13_6662199_6686474	circRNA	ENSCHIG00000011776	ISM1	isthmin 1 [Source:NCBI gene;Acc:102184352]	-0.86014	0.000331668	0.00393286	no
chi-miR-195-5p	7_106071302_106083419	circRNA	ENSCHIG00000026141	OBSCN	obscurin, cytoskeletal calmodulin and titin-interacting RhoGEF [Source:NCBI gene;Acc:106502252]	-0.769685	0.00341549	0.0150422	no
chi-miR-365-3p	22_58305714_58404500	circRNA				-0.839161	0.000642826	0.00565106	no
chi-miR-493-3p	19_41224623_41264269	circRNA				-0.734316	0.00653792	0.0208088	no
chi-miR-502b-3p	7_30508968_30606262	circRNA	ENSCHIG00000025474		teneurin-2 [Source:NCBI gene;Acc:108633191]	-0.809916	0.00140668	0.00866593	no
chi-miR-34a	4_26634562_26642536	circRNA				-0.790374	0.00221511	0.0113699	no
chi-miR-127-5p	11_74750881_74761497	circRNA	ENSCHIG00000008772	UBXN2A	UBX domain protein 2A [Source:NCBI gene;Acc:102172817]	-0.615385	0.0331699	0.0636096	no
chi-miR-27b-3p	16_43412593_43466290	circRNA	ENSCHIG00000025014	RERE	arginine-glutamic acid dipeptide repeats [Source:NCBI gene;Acc:102178646]	-0.647987	0.0226858	0.0488832	no
chi-miR-378-5p	29_27757487_27772458	circRNA	ENSCHIG00000006217	CCDC15	coiled-coil domain containing 15 [Source:NCBI gene;Acc:102182948]	-0.79372	0.00205628	0.0109812	no
chi-miR-502b-3p	8_112475884_112495957	circRNA	ENSCHIG00000023106	SH3YL1	SH3 and SYLF domain containing 1 [Source:NCBI gene;Acc:102186310]	-0.832872	0.000770065	0.00623472	no
chi-miR-485-5p	7_30567072_30606262	circRNA	ENSCHIG00000025474		teneurin-2 [Source:NCBI gene;Acc:108633191]	-0.802837	0.00166751	0.00960534	no
chi-miR-136-5p	8_94379232_94407339	circRNA				-0.752674	0.00472788	0.0174375	no
chi-miR-660	19_30415586_30452644	circRNA	ENSCHIG00000025624	MAP2K4	mitogen-activated protein kinase kinase 4 [Source:NCBI gene;Acc:102175799]	-0.636364	0.0260969	0.0536812	no
chi-miR-1197-3p	5_41858147_41881467	circRNA	ENSCHIG00000026435	CPNE8	copine 8 [Source:NCBI gene;Acc:102190022]	-0.746061	0.00532944	0.0188472	no
chi-miR-127-5p	3_34947311_34971589	circRNA				-0.781087	0.0027053	0.0129429	no
chi-miR-504	8_27506440_27547321	circRNA	ENSCHIG00000026061	BNC2	basonuclin 2 [Source:NCBI gene;Acc:102186591]	-0.664336	0.0184527	0.0422524	no
chi-miR-493-3p	23_24033577_24076325	circRNA				-0.81545	0.00122559	0.00811473	no
chi-miR-135b-5p	7_106069342_106082030	circRNA	ENSCHIG00000026141	OBSCN	obscurin, cytoskeletal calmodulin and titin-interacting RhoGEF [Source:NCBI gene;Acc:106502252]	-0.6381	0.0255651	0.0534514	no
chi-miR-376e-3p	12_40186002_40205920	circRNA	ENSCHIG00000003476	DACH1	dachshund family transcription factor 1 [Source:NCBI gene;Acc:102178371]	-0.704243	0.0105672	0.0287697	no
chi-miR-544-5p	9_26231856_26242268	circRNA				-0.713287	0.00920178	0.0258316	no
chi-miR-20a-5p	5_33471247_33488926	circRNA				-0.767076	0.00359618	0.0155115	no
chi-miR-130b-5p	7_30508968_30606262	circRNA	ENSCHIG00000025474		teneurin-2 [Source:NCBI gene;Acc:108633191]	-0.627032	0.0290927	0.0582904	no
chi-miR-20a-5p	8_59812602_59816811	circRNA	ENSCHIG00000013918	TMEM8B	transmembrane protein 8B [Source:NCBI gene;Acc:102182129]	-0.608392	0.035806	0.0671753	no
chi-miR-127-5p	19_41224623_41264269	circRNA				-0.734316	0.00653792	0.0208088	no
chi-miR-493-5p	19_41224843_41264566	circRNA				-0.752674	0.00472788	0.0174375	no
chi-miR-127-5p	19_40625362_40635698	circRNA				-0.778006	0.00288491	0.0136999	no
chi-miR-493-5p	19_41224623_41317024	circRNA				-0.761853	0.00397973	0.0162346	no
chi-miR-432-3p	5_27299842_27329315	circRNA				-0.734316	0.00653792	0.0208088	no
chi-miR-105a	1_146914668_146941336	circRNA	ENSCHIG00000016792	RUNX1	runt related transcription factor 1 [Source:NCBI gene;Acc:102178020]	-0.706294	0.0102452	0.0279658	no
chi-let-7b-5p	19_18405450_18435938	circRNA	ENSCHIG00000010629	NF1	neurofibromin 1 [Source:NCBI gene;Acc:102183001]	-0.795396	0.00198009	0.0106691	no
chi-miR-485-5p	7_30508968_30606262	circRNA	ENSCHIG00000025474		teneurin-2 [Source:NCBI gene;Acc:108633191]	-0.67182	0.0167217	0.0396093	no
chi-miR-27a-5p	13_57238800_57259672	circRNA	ENSCHIG00000023510	VAPB	VAMP associated protein B and C [Source:NCBI gene;Acc:102176246]	-0.713287	0.00920178	0.0258316	no
chi-miR-146a	7_87786751_87807127	circRNA	ENSCHIG00000020997	FNIP1	folliculin interacting protein 1 [Source:NCBI gene;Acc:102182584]	-0.746061	0.00532944	0.0188472	no
chi-miR-27b-5p	29_28684057_28729825	circRNA	ENSCHIG00000006678	CDON	cell adhesion associated, oncogene regulated [Source:NCBI gene;Acc:102188923]	-0.72028	0.00823977	0.0240034	no
chi-miR-154b-5p	24_58175423_58177785	circRNA	ENSCHIG00000009576	ZNF532	zinc finger protein 532 [Source:NCBI gene;Acc:102173802]	-0.832168	0.000785442	0.00623472	no
chi-miR-338-3p	7_106069342_106082030	circRNA	ENSCHIG00000026141	OBSCN	obscurin, cytoskeletal calmodulin and titin-interacting RhoGEF [Source:NCBI gene;Acc:106502252]	-0.732365	0.00675706	0.0213375	no
chi-miR-195-5p	3_40056419_40078403	circRNA	ENSCHIG00000012365	CACHD1	cache domain containing 1 [Source:NCBI gene;Acc:102183121]	-0.754568	0.00456545	0.0174375	no
chi-miR-125a-5p	19_40625362_40635698	circRNA				-0.769685	0.00341549	0.0150422	no
chi-miR-329b-3p	3_75922095_75973157	circRNA	ENSCHIG00000017438		sorting nexin 7 [Source:NCBI gene;Acc:102180557]	-0.692308	0.012593	0.0322295	no
chi-miR-34a	7_87786751_87807127	circRNA	ENSCHIG00000020997	FNIP1	folliculin interacting protein 1 [Source:NCBI gene;Acc:102182584]	-0.577934	0.0490488	0.084589	no
chi-miR-141	5_12285972_12311446	circRNA	ENSCHIG00000021548	TMTC2	transmembrane and tetratricopeptide repeat containing 2 [Source:NCBI gene;Acc:102190760]	-0.769231	0.00344645	0.0150422	no
chi-miR-379-5p	17_1790475_1833570	circRNA				-0.725137	0.00761729	0.0227305	no
chi-miR-195-5p	7_106074945_106082030	circRNA	ENSCHIG00000026141	OBSCN	obscurin, cytoskeletal calmodulin and titin-interacting RhoGEF [Source:NCBI gene;Acc:106502252]	-0.795396	0.00198009	0.0106691	no
chi-miR-34a	8_59812602_59816811	circRNA	ENSCHIG00000013918	TMEM8B	transmembrane protein 8B [Source:NCBI gene;Acc:102182129]	-0.713287	0.00920178	0.0258316	no
chi-miR-221-3p	2_29711456_29798577	circRNA				-0.724072	0.00775063	0.023066	no
chi-miR-378-5p	14_24243368_24258519	circRNA	ENSCHIG00000020362	OXR1	oxidation resistance 1 [Source:NCBI gene;Acc:102190975]	-0.587413	0.0446093	0.0788368	no
chi-miR-193b-3p	13_33258516_33272240	circRNA	ENSCHIG00000016385	ZEB1	zinc finger E-box binding homeobox 1 [Source:NCBI gene;Acc:106502734]	-0.825175	0.000951363	0.00690982	no
chi-miR-532-5p	19_41243691_41317024	circRNA				-0.761853	0.00397973	0.0162346	no
chi-miR-29c-3p	LWLT01000021.1_53251116_53322201	circRNA	ENSCHIG00000011491	REPS2	RALBP1 associated Eps domain containing 2 [Source:NCBI gene;Acc:102174285]	-0.868653	0.000245942	0.00349172	no
chi-miR-502b-3p	19_41224623_41264269	circRNA				-0.752674	0.00472788	0.0174375	no
chi-miR-27a-3p	23_42333788_42392758	circRNA	ENSCHIG00000020109			-0.786327	0.00241956	0.0121406	no
chi-miR-432-5p	7_30508968_30606262	circRNA	ENSCHIG00000025474		teneurin-2 [Source:NCBI gene;Acc:108633191]	-0.638229	0.0255261	0.0534261	no
chi-miR-24-3p	14_33358612_33374397	circRNA	ENSCHIG00000015490	TRPS1	transcriptional repressor GATA binding 1 [Source:NCBI gene;Acc:102184827]	-0.692308	0.012593	0.0322295	no
chi-miR-362-5p	24_61106670_61114405	circRNA	ENSCHIG00000016298	ZCCHC2	zinc finger CCHC-type containing 2 [Source:NCBI gene;Acc:102183197]	-0.629371	0.0283197	0.0569031	no
chi-miR-27b-5p	10_91508829_91592619	circRNA	ENSCHIG00000014180	LHFPL2	LHFPL tetraspan subfamily member 2 [Source:NCBI gene;Acc:102189127]	-0.866219	0.000268443	0.00357864	no
chi-miR-27b-5p	24_41105431_41135344	circRNA	ENSCHIG00000015240	PTPRM	protein tyrosine phosphatase, receptor type M [Source:NCBI gene;Acc:102173248]	-0.58042	0.047856	0.0829136	no
chi-miR-141	14_12418438_12425224	circRNA	ENSCHIG00000015977	VIRMA	vir like m6A methyltransferase associated [Source:NCBI gene;Acc:102186498]	-0.776224	0.00299286	0.0137075	no
chi-miR-483	1_146914668_146941336	circRNA	ENSCHIG00000016792	RUNX1	runt related transcription factor 1 [Source:NCBI gene;Acc:102178020]	-0.657343	0.0201855	0.0449851	no
chi-miR-193b-3p	10_96324160_96341261	circRNA	ENSCHIG00000025037	LVRN	laeverin [Source:NCBI gene;Acc:102185571]	-0.861346	0.000318283	0.00393286	no
chi-miR-29a-3p	LWLT01000021.1_8553591_8594629	circRNA				-0.826588	0.000915842	0.00690982	no
chi-miR-146b-5p	LWLT01000021.1_53251116_53322201	circRNA	ENSCHIG00000011491	REPS2	RALBP1 associated Eps domain containing 2 [Source:NCBI gene;Acc:102174285]	-0.71804	0.00853932	0.024677	no
chi-miR-221-3p	3_62283557_62294562	circRNA	ENSCHIG00000014781	SYDE2	synapse defective Rho GTPase homolog 2 [Source:NCBI gene;Acc:102186263]	-0.755245	0.00450843	0.0174375	no
chi-miR-146b-5p	23_42354033_42406135	circRNA	ENSCHIG00000020109			-0.686224	0.0137298	0.0344654	no
chi-miR-429	LWLT01000021.1_8553591_8594629	circRNA				-0.709618	0.00973881	0.0271625	no
chi-miR-708-3p	5_12285972_12338205	circRNA	ENSCHIG00000021548	TMTC2	transmembrane and tetratricopeptide repeat containing 2 [Source:NCBI gene;Acc:102190760]	-0.608392	0.035806	0.0671753	no
chi-let-7b-5p	LWLT01000021.1_53251116_53322201	circRNA	ENSCHIG00000011491	REPS2	RALBP1 associated Eps domain containing 2 [Source:NCBI gene;Acc:102174285]	-0.746061	0.00532944	0.0188472	no
chi-miR-1185-3p	19_41264441_41317024	circRNA				-0.734316	0.00653792	0.0208088	no
chi-miR-17-5p	7_85052007_85118197	circRNA	ENSCHIG00000013312	FBN2	fibrillin 2 [Source:NCBI gene;Acc:102173553]	-0.811189	0.00136331	0.00845946	no
chi-miR-143-3p	14_17325515_17397222	circRNA	ENSCHIG00000016789			-0.727273	0.00735503	0.0224232	no
chi-miR-24-3p	7_172120_230877	circRNA	ENSCHIG00000011930	CAMK4	calcium/calmodulin dependent protein kinase IV [Source:NCBI gene;Acc:102187484]	-0.615385	0.0331699	0.0636096	no
chi-miR-146b-5p	1_45523147_45539217	circRNA	ENSCHIG00000010277	IMPG2	interphotoreceptor matrix proteoglycan 2 [Source:NCBI gene;Acc:102183182]	-0.795794	0.00196229	0.0106279	no
chi-miR-144-5p	6_2399934_2465968	circRNA				-0.752674	0.00472788	0.0174375	no
chi-miR-485-5p	13_6662199_6671983	circRNA	ENSCHIG00000011776	ISM1	isthmin 1 [Source:NCBI gene;Acc:102184352]	-0.608392	0.035806	0.0671753	no
chi-miR-365-3p	3_62283557_62294562	circRNA	ENSCHIG00000014781	SYDE2	synapse defective Rho GTPase homolog 2 [Source:NCBI gene;Acc:102186263]	-0.608392	0.035806	0.0671753	no
chi-miR-27b-5p	LWLT01000021.1_51692245_51705256	circRNA				-0.692308	0.012593	0.0322295	no
chi-let-7g-3p	7_86075420_86092932	circRNA	ENSCHIG00000018817	ADAMTS19	ADAM metallopeptidase with thrombospondin type 1 motif 19 [Source:NCBI gene;Acc:102170967]	-0.640861	0.0247359	0.0520105	no
chi-miR-378-3p	4_41207111_41254724	circRNA	ENSCHIG00000015297	GLI3	GLI family zinc finger 3 [Source:NCBI gene;Acc:102178142]	-0.717863	0.00856333	0.0247067	no
chi-miR-141	3_26908088_26924264	circRNA	ENSCHIG00000023944	TUT4	terminal uridylyl transferase 4 [Source:NCBI gene;Acc:102184303]	-0.873261	0.000207389	0.00311162	no
chi-miR-135b-5p	16_63542706_63560758	circRNA	ENSCHIG00000017821	RGL1	ral guanine nucleotide dissociation stimulator like 1 [Source:NCBI gene;Acc:102173025]	-0.832168	0.000785442	0.00623472	no
chi-miR-128-3p	19_41224623_41317024	circRNA				-0.734316	0.00653792	0.0208088	no
chi-miR-708-5p	10_96324160_96341261	circRNA	ENSCHIG00000025037	LVRN	laeverin [Source:NCBI gene;Acc:102185571]	-0.815076	0.00123724	0.00817852	no
chi-let-7g-3p	22_28687216_28699682	circRNA	ENSCHIG00000011713	GXYLT2	glucoside xylosyltransferase 2 [Source:NCBI gene;Acc:102169917]	-0.779483	0.00279771	0.013324	no
chi-miR-27a-3p	23_42333788_42406135	circRNA	ENSCHIG00000020109			-0.85778	0.000359119	0.00414931	no
chi-miR-20a-5p	21_65118441_65144687	circRNA	ENSCHIG00000010656	RTL1	retrotransposon Gag like 1 [Source:NCBI gene;Acc:102180435]	-0.74081	0.00584681	0.0199073	no
chi-miR-130b-5p	19_41224843_41264566	circRNA				-0.734316	0.00653792	0.0208088	no
chi-miR-487a-3p	1_146914668_146941336	circRNA	ENSCHIG00000016792	RUNX1	runt related transcription factor 1 [Source:NCBI gene;Acc:102178020]	-0.846154	0.000521134	0.00507581	no
chi-let-7g-3p	14_93232044_93282219	circRNA	ENSCHIG00000011011	RIMS1	regulating synaptic membrane exocytosis 1 [Source:NCBI gene;Acc:102184538]	-0.769231	0.00344645	0.0150422	no
chi-miR-133a-5p	3_75922095_75973157	circRNA	ENSCHIG00000017438		sorting nexin 7 [Source:NCBI gene;Acc:102180557]	-0.685315	0.013906	0.0344654	no
chi-miR-200a	3_119473360_119499163	circRNA	ENSCHIG00000024329	DCAF6	DDB1 and CUL4 associated factor 6 [Source:NCBI gene;Acc:102172777]	-0.754118	0.00460361	0.0174375	no
chi-miR-33a-3p	19_18405450_18435938	circRNA	ENSCHIG00000010629	NF1	neurofibromin 1 [Source:NCBI gene;Acc:102183001]	-0.600446	0.0389791	0.071523	no
chi-miR-34a	26_27620469_27621462	circRNA	ENSCHIG00000021908	NEURL1	neuralized E3 ubiquitin protein ligase 1 [Source:NCBI gene;Acc:102170578]	-0.884562	0.000132601	0.00254311	no
chi-miR-29a-3p	22_2762718_2778459	circRNA	ENSCHIG00000022736	ZCWPW2	zinc finger CW-type and PWWP domain containing 2 [Source:NCBI gene;Acc:102168495]	-0.672704	0.0165253	0.039507	no
chi-miR-504	27_18607920_18650811	circRNA				-0.637479	0.0257544	0.0536812	no
chi-miR-29b-3p	29_28684057_28729825	circRNA	ENSCHIG00000006678	CDON	cell adhesion associated, oncogene regulated [Source:NCBI gene;Acc:102188923]	-0.65035	0.0220342	0.0476499	no
chi-miR-193b-3p	23_42333788_42392758	circRNA	ENSCHIG00000020109			-0.81545	0.00122559	0.00811473	no
chi-miR-200a	LWLT01000042.1_310269_326220	circRNA	ENSCHIG00000000152	MAPK1	mitogen-activated protein kinase 1 [Source:NCBI gene;Acc:102186040]	-0.734266	0.00654349	0.0208088	no
chi-miR-214-3p	9_89761790_89768790	circRNA	ENSCHIG00000022083	AFDN	afadin, adherens junction formation factor [Source:NCBI gene;Acc:106502495]	-0.622378	0.0306759	0.0602888	no
chi-miR-146b-5p	23_42333788_42406135	circRNA	ENSCHIG00000020109			-0.70182	0.0109574	0.0296367	no
chi-miR-432-5p	1_19404630_19454650	circRNA				-0.601519	0.0385394	0.0708848	no
chi-miR-329b-3p	3_34947311_34971589	circRNA				-0.844134	0.000554262	0.00532789	no
chi-miR-376c-3p	5_33934307_33943369	circRNA	ENSCHIG00000010883	ARID2	AT-rich interaction domain 2 [Source:NCBI gene;Acc:102168890]	-0.830124	0.000831418	0.00648219	no
chi-miR-27a-3p	13_33258516_33272240	circRNA	ENSCHIG00000016385	ZEB1	zinc finger E-box binding homeobox 1 [Source:NCBI gene;Acc:106502734]	-0.79021	0.00222314	0.0113699	no
chi-miR-3959-3p	19_41224843_41264566	circRNA				-0.752674	0.00472788	0.0174375	no
chi-miR-378-3p	13_27614314_27632737	circRNA	ENSCHIG00000000499		pre-mRNA processing factor 18 [Source:NCBI gene;Acc:102174754]	-0.804196	0.00161477	0.00939149	no
chi-miR-362-5p	23_24035889_24054601	circRNA				-0.734316	0.00653792	0.0208088	no
chi-miR-127-5p	7_30508968_30606262	circRNA	ENSCHIG00000025474		teneurin-2 [Source:NCBI gene;Acc:108633191]	-0.675552	0.0159045	0.0381148	no
chi-miR-146b-3p	22_10308020_10312570	circRNA	ENSCHIG00000021299	LRRFIP2	LRR binding FLII interacting protein 2 [Source:NCBI gene;Acc:102180895]	-0.7798	0.00277927	0.0132521	no
chi-miR-502b-3p	8_94379232_94407339	circRNA				-0.734316	0.00653792	0.0208088	no
chi-miR-412-3p	6_68272249_68299586	circRNA	ENSCHIG00000024006	DCUN1D4	defective in cullin neddylation 1 domain containing 4 [Source:NCBI gene;Acc:102178894]	-0.86014	0.000331668	0.00393286	no
chi-miR-497-5p	4_28177351_28196356	circRNA	ENSCHIG00000023390	SND1	staphylococcal nuclease and tudor domain containing 1 [Source:NCBI gene;Acc:102172121]	-0.89189	9.68e-05	0.00217509	no
chi-miR-200c	13_57238800_57259672	circRNA	ENSCHIG00000023510	VAPB	VAMP associated protein B and C [Source:NCBI gene;Acc:102176246]	-0.797203	0.00190037	0.0103462	no
chi-miR-378-5p	15_78002037_78006800	circRNA	ENSCHIG00000006770	PDGFD	platelet derived growth factor D [Source:NCBI gene;Acc:102168651]	-0.797203	0.00190037	0.0103462	no
chi-miR-27b-3p	4_58963091_58983051	circRNA	ENSCHIG00000013805	2023-09-07	septin 7 [Source:NCBI gene;Acc:102190377]	-0.788092	0.00232868	0.0117679	no
chi-miR-130b-5p	19_41224623_41317024	circRNA				-0.725137	0.00761729	0.0227305	no
chi-miR-1197-3p	13_27614314_27632737	circRNA	ENSCHIG00000000499		pre-mRNA processing factor 18 [Source:NCBI gene;Acc:102174754]	-0.727273	0.00735503	0.0224232	no
chi-miR-93-5p	29_28684057_28729825	circRNA	ENSCHIG00000006678	CDON	cell adhesion associated, oncogene regulated [Source:NCBI gene;Acc:102188923]	-0.741259	0.00580115	0.0197721	no
chi-miR-381	12_40062027_40121789	circRNA	ENSCHIG00000003476	DACH1	dachshund family transcription factor 1 [Source:NCBI gene;Acc:102178371]	-0.664355	0.0184481	0.0422524	no
chi-miR-105b-5p	22_44277031_44317361	circRNA	ENSCHIG00000018878,ENSCHIG00000025264	TASOR,CCDC66		-0.664336	0.0184527	0.0422524	no
chi-miR-380-5p	4_33600215_33618663	circRNA	ENSCHIG00000009703	AASS	aminoadipate-semialdehyde synthase [Source:NCBI gene;Acc:102185894]	-0.608392	0.035806	0.0671753	no
chi-miR-29c-3p	24_40253104_40263109	circRNA	ENSCHIG00000022452	ARHGAP28	Rho GTPase activating protein 28 [Source:NCBI gene;Acc:102172677]	-0.881119	0.000152674	0.00263758	no
chi-miR-145-5p	11_96714402_96756768	circRNA	ENSCHIG00000013327	MVB12B	multivesicular body subunit 12B [Source:NCBI gene;Acc:102187499]	-0.588442	0.0441448	0.0788087	no
chi-miR-141	19_14385907_14397043	circRNA	ENSCHIG00000019283		adaptor related protein complex 2 subunit beta 1 [Source:NCBI gene;Acc:102172093]	-0.733012	0.00668381	0.0211851	no
chi-miR-338-3p	4_56393857_56404364	circRNA	ENSCHIG00000013518	FKBP9	FKBP prolyl isomerase 9 [Source:NCBI gene;Acc:102170482]	-0.622378	0.0306759	0.0602888	no
chi-miR-34a	LWLT01000021.1_53251116_53322201	circRNA	ENSCHIG00000011491	REPS2	RALBP1 associated Eps domain containing 2 [Source:NCBI gene;Acc:102174285]	-0.837129	0.000682001	0.00591167	no
chi-miR-135b-5p	7_106074945_106081450	circRNA	ENSCHIG00000026141	OBSCN	obscurin, cytoskeletal calmodulin and titin-interacting RhoGEF [Source:NCBI gene;Acc:106502252]	-0.586625	0.044967	0.0793983	no
chi-miR-432-3p	8_55432434_55460431	circRNA	ENSCHIG00000019651	TLE4	TLE family member 4, transcriptional corepressor [Source:NCBI gene;Acc:102171243]	-0.734316	0.00653792	0.0208088	no
chi-miR-17-5p	21_23975771_23990240	circRNA	ENSCHIG00000016013	SH3GL3	SH3 domain containing GRB2 like 3, endophilin A3 [Source:NCBI gene;Acc:102168209]	-0.838049	0.000664043	0.00579651	no
chi-miR-20a-5p	16_43412593_43466290	circRNA	ENSCHIG00000025014	RERE	arginine-glutamic acid dipeptide repeats [Source:NCBI gene;Acc:102178646]	-0.6655	0.0181751	0.0422524	no
chi-miR-2332	7_85052007_85118197	circRNA	ENSCHIG00000013312	FBN2	fibrillin 2 [Source:NCBI gene;Acc:102173553]	-0.601399	0.0385885	0.0708848	no
chi-miR-27a-3p	14_93232044_93282219	circRNA	ENSCHIG00000011011	RIMS1	regulating synaptic membrane exocytosis 1 [Source:NCBI gene;Acc:102184538]	-0.601399	0.0385885	0.0708848	no
chi-miR-125b-5p	19_41224843_41264566	circRNA				-0.734316	0.00653792	0.0208088	no
chi-miR-758	19_41224623_41264269	circRNA				-0.752674	0.00472788	0.0174375	no
chi-miR-382-5p	6_77332183_77341172	circRNA				-0.76886	0.00347187	0.0151265	no
chi-miR-27b-5p	5_115017045_115041174	circRNA	ENSCHIG00000014589	ATXN10	ataxin 10 [Source:NCBI gene;Acc:102177039]	-0.65035	0.0220342	0.0476499	no
chi-miR-34a	23_42354033_42406135	circRNA	ENSCHIG00000020109			-0.725214	0.00760775	0.0227305	no
chi-miR-497-5p	19_14385907_14397043	circRNA	ENSCHIG00000019283		adaptor related protein complex 2 subunit beta 1 [Source:NCBI gene;Acc:102172093]	-0.826588	0.000915842	0.00690982	no
chi-miR-224-5p	22_44277031_44317361	circRNA	ENSCHIG00000018878,ENSCHIG00000025264	TASOR,CCDC66		-0.818182	0.0011431	0.00771266	no
chi-miR-3959-5p	11_74750881_74761497	circRNA	ENSCHIG00000008772	UBXN2A	UBX domain protein 2A [Source:NCBI gene;Acc:102172817]	-0.65035	0.0220342	0.0476499	no
chi-miR-338-3p	LWLT01000021.1_8553591_8594629	circRNA				-0.70182	0.0109574	0.0296367	no
chi-miR-338-3p	3_119473360_119499163	circRNA	ENSCHIG00000024329	DCAF6	DDB1 and CUL4 associated factor 6 [Source:NCBI gene;Acc:102172777]	-0.70336	0.0107081	0.0290536	no
chi-miR-221-3p	24_40253104_40263109	circRNA	ENSCHIG00000022452	ARHGAP28	Rho GTPase activating protein 28 [Source:NCBI gene;Acc:102172677]	-0.748252	0.00512408	0.0182641	no
chi-miR-378-5p	19_41224623_41317024	circRNA				-0.752674	0.00472788	0.0174375	no
chi-miR-29a-5p	10_91508829_91592619	circRNA	ENSCHIG00000014180	LHFPL2	LHFPL tetraspan subfamily member 2 [Source:NCBI gene;Acc:102189127]	-0.633819	0.0268907	0.0551369	no
chi-miR-432-3p	19_41224623_41317024	circRNA				-0.734316	0.00653792	0.0208088	no
chi-miR-141	22_58305714_58404500	circRNA				-0.804196	0.00161477	0.00939149	no
chi-miR-379-5p	12_40062027_40121789	circRNA	ENSCHIG00000003476	DACH1	dachshund family transcription factor 1 [Source:NCBI gene;Acc:102178371]	-0.787522	0.00235775	0.0118485	no
chi-miR-497-5p	2_42407861_42445850	circRNA	ENSCHIG00000007723	PARD3B	par-3 family cell polarity regulator beta [Source:NCBI gene;Acc:102173793]	-0.739001	0.00603345	0.0203162	no
chi-miR-105b-5p	15_78002037_78006800	circRNA	ENSCHIG00000006770	PDGFD	platelet derived growth factor D [Source:NCBI gene;Acc:102168651]	-0.769231	0.00344645	0.0150422	no
chi-miR-380-3p	19_41224843_41264566	circRNA				-0.725137	0.00761729	0.0227305	no
chi-miR-497-5p	24_41105431_41135344	circRNA	ENSCHIG00000015240	PTPRM	protein tyrosine phosphatase, receptor type M [Source:NCBI gene;Acc:102173248]	-0.601399	0.0385885	0.0708848	no
chi-miR-135b-5p	11_96714402_96756768	circRNA	ENSCHIG00000013327	MVB12B	multivesicular body subunit 12B [Source:NCBI gene;Acc:102187499]	-0.721542	0.00807444	0.0239435	no
chi-miR-146b-3p	24_29162254_29171481	circRNA	ENSCHIG00000018662	CDH2	cadherin 2 [Source:NCBI gene;Acc:102188004]	-0.882663	0.000143397	0.00263758	no
chi-miR-660	8_112475884_112495957	circRNA	ENSCHIG00000023106	SH3YL1	SH3 and SYLF domain containing 1 [Source:NCBI gene;Acc:102186310]	-0.918295	2.5e-05	0.00110885	no
chi-miR-200a	10_91508829_91592619	circRNA	ENSCHIG00000014180	LHFPL2	LHFPL tetraspan subfamily member 2 [Source:NCBI gene;Acc:102189127]	-0.711285	0.00949192	0.0265672	no
chi-miR-146b-3p	29_28684057_28729825	circRNA	ENSCHIG00000006678	CDON	cell adhesion associated, oncogene regulated [Source:NCBI gene;Acc:102188923]	-0.811189	0.00136331	0.00845946	no
chi-miR-497-5p	11_96714402_96756768	circRNA	ENSCHIG00000013327	MVB12B	multivesicular body subunit 12B [Source:NCBI gene;Acc:102187499]	-0.830124	0.000831418	0.00648219	no
chi-miR-496-3p	3_14571221_14575269	circRNA	ENSCHIG00000013259	TRIT1	tRNA isopentenyltransferase 1 [Source:NCBI gene;Acc:102190093]	-0.674356	0.0161631	0.0387018	no
chi-miR-17-5p	5_7389082_7415006	circRNA	ENSCHIG00000012255	NAV3	neuron navigator 3 [Source:NCBI gene;Acc:102182566]	-0.69406	0.0122789	0.0320631	no
chi-miR-214-3p	19_41224623_41317024	circRNA				-0.734316	0.00653792	0.0208088	no
chi-miR-296-3p	23_23531594_23581098	circRNA				-0.67182	0.0167217	0.0396093	no
chi-miR-130b-3p	19_41224623_41317024	circRNA				-0.725137	0.00761729	0.0227305	no
chi-miR-24-3p	11_37378664_37381829	circRNA	ENSCHIG00000007157	RTN4	reticulon 4 [Source:NCBI gene;Acc:102186405]	-0.794648	0.00201382	0.0107661	no
chi-miR-130b-5p	25_13954229_13960749	circRNA	ENSCHIG00000010603,ENSCHIG00000023722	MYH11,NDE1		-0.633552	0.0269747	0.0552864	no
chi-miR-27a-5p	22_58305714_58404500	circRNA				-0.818182	0.0011431	0.00771266	no
chi-miR-497-5p	6_2399934_2465968	circRNA				-0.752674	0.00472788	0.0174375	no
chi-miR-20a-5p	6_6537220_6549706	circRNA	ENSCHIG00000012778	MYOZ2	myozenin 2 [Source:NCBI gene;Acc:102169268]	-0.803194	0.00165353	0.00958044	no
chi-miR-432-3p	6_68272249_68299586	circRNA	ENSCHIG00000024006	DCUN1D4	defective in cullin neddylation 1 domain containing 4 [Source:NCBI gene;Acc:102178894]	-0.657343	0.0201855	0.0449851	no
chi-miR-338-3p	19_14385907_14397043	circRNA	ENSCHIG00000019283		adaptor related protein complex 2 subunit beta 1 [Source:NCBI gene;Acc:102172093]	-0.787598	0.00235387	0.0118469	no
chi-miR-410-5p	3_14571221_14575269	circRNA	ENSCHIG00000013259	TRIT1	tRNA isopentenyltransferase 1 [Source:NCBI gene;Acc:102190093]	-0.761369	0.00401672	0.0163318	no
chi-miR-338-3p	7_85052007_85118197	circRNA	ENSCHIG00000013312	FBN2	fibrillin 2 [Source:NCBI gene;Acc:102173553]	-0.783217	0.00258622	0.0125455	no
chi-miR-409-5p	13_27614314_27632737	circRNA	ENSCHIG00000000499		pre-mRNA processing factor 18 [Source:NCBI gene;Acc:102174754]	-0.727273	0.00735503	0.0224232	no
chi-miR-329a-3p	5_27299842_27329315	circRNA				-0.734316	0.00653792	0.0208088	no
chi-miR-1185-3p	19_41243691_41317024	circRNA				-0.725137	0.00761729	0.0227305	no
chi-miR-105a	23_23531594_23581098	circRNA				-0.589708	0.0435783	0.0779446	no
chi-miR-29a-3p	13_33179100_33272240	circRNA	ENSCHIG00000016385	ZEB1	zinc finger E-box binding homeobox 1 [Source:NCBI gene;Acc:106502734]	-0.755245	0.00450843	0.0174375	no
chi-miR-485-3p	16_54872062_54880782	circRNA	ENSCHIG00000016451	TNN	tenascin N [Source:NCBI gene;Acc:102181229]	-0.725137	0.00761729	0.0227305	no
chi-miR-500-5p	23_23531594_23581098	circRNA				-0.828577	0.000867564	0.00673227	no
chi-miR-34c-3p	19_41224623_41317024	circRNA				-0.761853	0.00397973	0.0162346	no
chi-miR-224-5p	4_41207111_41254724	circRNA	ENSCHIG00000015297	GLI3	GLI family zinc finger 3 [Source:NCBI gene;Acc:102178142]	-0.899141	6.92e-05	0.00179204	no
chi-miR-34a	7_85052007_85118197	circRNA	ENSCHIG00000013312	FBN2	fibrillin 2 [Source:NCBI gene;Acc:102173553]	-0.944056	3.93e-06	0.000389781	no
chi-miR-127-5p	1_146914668_146941336	circRNA	ENSCHIG00000016792	RUNX1	runt related transcription factor 1 [Source:NCBI gene;Acc:102178020]	-0.797203	0.00190037	0.0103462	no
chi-miR-143-5p	16_63542706_63560758	circRNA	ENSCHIG00000017821	RGL1	ral guanine nucleotide dissociation stimulator like 1 [Source:NCBI gene;Acc:102173025]	-0.58042	0.047856	0.0829136	no
chi-miR-365-3p	12_60568820_60613884	circRNA	ENSCHIG00000024367	NBEA	neurobeachin [Source:NCBI gene;Acc:102186605]	-0.679823	0.0150058	0.0368783	no
chi-miR-338-3p	12_35520126_35552054	circRNA	ENSCHIG00000005312	LMO7	LIM domain 7 [Source:NCBI gene;Acc:102182606]	-0.70182	0.0109574	0.0296367	no
chi-miR-20a-5p	5_7389082_7415006	circRNA	ENSCHIG00000012255	NAV3	neuron navigator 3 [Source:NCBI gene;Acc:102182566]	-0.708297	0.00993769	0.0276628	no
chi-miR-383	19_41264441_41317024	circRNA				-0.752674	0.00472788	0.0174375	no
chi-miR-143-3p	5_12285972_12311446	circRNA	ENSCHIG00000021548	TMTC2	transmembrane and tetratricopeptide repeat containing 2 [Source:NCBI gene;Acc:102190760]	-0.783217	0.00258622	0.0125455	no
chi-miR-376c-5p	9_26231856_26242268	circRNA				-0.895105	8.37e-05	0.00191113	no
chi-miR-378-3p	12_40062027_40121789	circRNA	ENSCHIG00000003476	DACH1	dachshund family transcription factor 1 [Source:NCBI gene;Acc:102178371]	-0.780057	0.00276436	0.0132032	no
chi-let-7b-5p	24_23828087_23885973	circRNA	ENSCHIG00000000206	ASXL3	ASXL transcriptional regulator 3 [Source:NCBI gene;Acc:102185524]	-0.754118	0.00460361	0.0174375	no
chi-miR-410-3p	19_41224623_41317024	circRNA				-0.725137	0.00761729	0.0227305	no
chi-miR-338-3p	22_58305714_58404500	circRNA				-0.65035	0.0220342	0.0476499	no
chi-miR-1197-3p	9_89761790_89768790	circRNA	ENSCHIG00000022083	AFDN	afadin, adherens junction formation factor [Source:NCBI gene;Acc:106502495]	-0.79021	0.00222314	0.0113699	no
chi-miR-29a-5p	27_26263263_26281959	circRNA	ENSCHIG00000018661	PCM1	pericentriolar material 1 [Source:NCBI gene;Acc:102191676]	-0.594406	0.0415215	0.0747889	no
chi-miR-758	1_19404630_19454650	circRNA				-0.729653	0.0070708	0.0221871	no
chi-miR-378-5p	12_40062027_40121789	circRNA	ENSCHIG00000003476	DACH1	dachshund family transcription factor 1 [Source:NCBI gene;Acc:102178371]	-0.794986	0.00199849	0.0107159	no
chi-miR-497-5p	12_35520126_35552054	circRNA	ENSCHIG00000005312	LMO7	LIM domain 7 [Source:NCBI gene;Acc:102182606]	-0.888972	0.00010998	0.00224534	no
chi-miR-502b-3p	17_1790475_1833570	circRNA				-0.752674	0.00472788	0.0174375	no
chi-miR-296-3p	17_1790475_1833570	circRNA				-0.752674	0.00472788	0.0174375	no
chi-miR-27b-3p	23_42333788_42392758	circRNA	ENSCHIG00000020109			-0.832092	0.000787114	0.00623472	no
chi-miR-127-5p	23_24033577_24076325	circRNA				-0.740562	0.00587214	0.0199524	no
chi-miR-3431-5p	3_85681727_85709217	circRNA				-0.802451	0.00168271	0.00966487	no
chi-miR-2332	23_42354033_42406135	circRNA	ENSCHIG00000020109			-0.600446	0.0389791	0.071523	no
chi-miR-141	3_119473360_119499163	circRNA	ENSCHIG00000024329	DCAF6	DDB1 and CUL4 associated factor 6 [Source:NCBI gene;Acc:102172777]	-0.768621	0.00348837	0.0151718	no
chi-miR-532-3p	3_3505853_3508695	circRNA	ENSCHIG00000006587		LRR binding FLII interacting protein 1 [Source:NCBI gene;Acc:102170479]	-0.706294	0.0102452	0.0279658	no
chi-miR-146b-3p	10_91508829_91592619	circRNA	ENSCHIG00000014180	LHFPL2	LHFPL tetraspan subfamily member 2 [Source:NCBI gene;Acc:102189127]	-0.6972	0.0117306	0.030817	no
chi-miR-27b-3p	21_65118441_65144687	circRNA	ENSCHIG00000010656	RTL1	retrotransposon Gag like 1 [Source:NCBI gene;Acc:102180435]	-0.795396	0.00198009	0.0106691	no
chi-miR-338-3p	2_29711456_29798577	circRNA				-0.709143	0.00980999	0.0273418	no
chi-miR-224-5p	19_41224623_41317024	circRNA				-0.725137	0.00761729	0.0227305	no
chi-miR-493-3p	19_41224623_41243518	circRNA	ENSCHIG00000025510		keratin, type I microfibrillar 48 kDa, component 8C-1 [Source:NCBI gene;Acc:102176726]	-0.734316	0.00653792	0.0208088	no
chi-miR-221-5p	10_91508829_91592619	circRNA	ENSCHIG00000014180	LHFPL2	LHFPL tetraspan subfamily member 2 [Source:NCBI gene;Acc:102189127]	-0.6972	0.0117306	0.030817	no
chi-miR-145-3p	4_28177351_28196356	circRNA	ENSCHIG00000023390	SND1	staphylococcal nuclease and tudor domain containing 1 [Source:NCBI gene;Acc:102172121]	-0.739616	0.00596952	0.0202072	no
chi-miR-502b-3p	19_41224623_41243518	circRNA	ENSCHIG00000025510		keratin, type I microfibrillar 48 kDa, component 8C-1 [Source:NCBI gene;Acc:102176726]	-0.752674	0.00472788	0.0174375	no
chi-miR-23b-3p	LWLT01000021.1_51692245_51705256	circRNA				-0.783217	0.00258622	0.0125455	no
chi-miR-136-5p	8_112475884_112495957	circRNA	ENSCHIG00000023106	SH3YL1	SH3 and SYLF domain containing 1 [Source:NCBI gene;Acc:102186310]	-0.825754	0.000936688	0.00690982	no
chi-miR-532-3p	6_102437660_102447350	circRNA	ENSCHIG00000008450	AFF1	AF4/FMR2 family member 1 [Source:NCBI gene;Acc:102185996]	-0.751009	0.00487425	0.0179473	no
chi-miR-338-3p	5_33471247_33488926	circRNA				-0.889669	0.0001067	0.00224534	no
chi-miR-27a-3p	LWLT01000033.1_487666_506588	circRNA	ENSCHIG00000015457	CASK	calcium/calmodulin dependent serine protein kinase [Source:NCBI gene;Acc:102171047]	-0.718328	0.00850036	0.0246432	no
chi-miR-141	13_33179100_33272240	circRNA	ENSCHIG00000016385	ZEB1	zinc finger E-box binding homeobox 1 [Source:NCBI gene;Acc:106502734]	-0.804196	0.00161477	0.00939149	no
chi-miR-708-5p	7_14146902_14183277	circRNA	ENSCHIG00000012539	LNPEP	leucyl and cystinyl aminopeptidase [Source:NCBI gene;Acc:102186394]	-0.95715	1.06e-06	0.000216627	no
chi-miR-146b-5p	21_65000513_65014965	circRNA				-0.748608	0.00509129	0.0182641	no
chi-miR-485-5p	5_41858147_41881467	circRNA	ENSCHIG00000026435	CPNE8	copine 8 [Source:NCBI gene;Acc:102190022]	-0.672505	0.0165693	0.0395741	no
chi-miR-3959-3p	19_41224623_41317024	circRNA				-0.761853	0.00397973	0.0162346	no
chi-miR-146b-5p	14_12418438_12425224	circRNA	ENSCHIG00000015977	VIRMA	vir like m6A methyltransferase associated [Source:NCBI gene;Acc:102186498]	-0.818182	0.0011431	0.00771266	no
chi-miR-211	19_41243691_41317024	circRNA				-0.725137	0.00761729	0.0227305	no
chi-miR-200b	LWLT01000021.1_53251116_53322201	circRNA	ENSCHIG00000011491	REPS2	RALBP1 associated Eps domain containing 2 [Source:NCBI gene;Acc:102174285]	-0.816113	0.00120515	0.00803301	no
chi-miR-146b-5p	7_87786751_87807127	circRNA	ENSCHIG00000020997	FNIP1	folliculin interacting protein 1 [Source:NCBI gene;Acc:102182584]	-0.619966	0.0315202	0.0617436	no
chi-miR-224-5p	4_33600215_33618663	circRNA	ENSCHIG00000009703	AASS	aminoadipate-semialdehyde synthase [Source:NCBI gene;Acc:102185894]	-0.713287	0.00920178	0.0258316	no
chi-miR-660	22_44277031_44317361	circRNA	ENSCHIG00000018878,ENSCHIG00000025264	TASOR,CCDC66		-0.629371	0.0283197	0.0569031	no
chi-miR-34a	10_96341135_96348625	circRNA	ENSCHIG00000025037	LVRN	laeverin [Source:NCBI gene;Acc:102185571]	-0.728548	0.00720175	0.0224232	no
chi-miR-29b-5p	13_57238800_57259672	circRNA	ENSCHIG00000023510	VAPB	VAMP associated protein B and C [Source:NCBI gene;Acc:102176246]	-0.713287	0.00920178	0.0258316	no
chi-miR-496-5p	19_30415586_30452644	circRNA	ENSCHIG00000025624	MAP2K4	mitogen-activated protein kinase kinase 4 [Source:NCBI gene;Acc:102175799]	-0.601399	0.0385885	0.0708848	no
chi-miR-200a	13_33128511_33130321	circRNA	ENSCHIG00000016385	ZEB1	zinc finger E-box binding homeobox 1 [Source:NCBI gene;Acc:106502734]	-0.594406	0.0415215	0.0747889	no
chi-miR-3955-3p	19_41243691_41317024	circRNA				-0.752674	0.00472788	0.0174375	no
chi-miR-224-5p	19_41224843_41264566	circRNA				-0.734316	0.00653792	0.0208088	no
chi-miR-412-3p	17_1790475_1833570	circRNA				-0.734316	0.00653792	0.0208088	no
chi-miR-411b-3p	1_146914668_146941336	circRNA	ENSCHIG00000016792	RUNX1	runt related transcription factor 1 [Source:NCBI gene;Acc:102178020]	-0.846154	0.000521134	0.00507581	no
chi-miR-200a	3_26908088_26924264	circRNA	ENSCHIG00000023944	TUT4	terminal uridylyl transferase 4 [Source:NCBI gene;Acc:102184303]	-0.866219	0.000268443	0.00357864	no
chi-miR-376a	23_23531594_23581098	circRNA				-0.865901	0.000271496	0.00361449	no
chi-miR-20a-5p	29_28684057_28729825	circRNA	ENSCHIG00000006678	CDON	cell adhesion associated, oncogene regulated [Source:NCBI gene;Acc:102188923]	-0.776224	0.00299286	0.0137075	no
chi-miR-100-3p	17_1790475_1833570	circRNA				-0.725137	0.00761729	0.0227305	no
chi-miR-195-3p	13_57238800_57259672	circRNA	ENSCHIG00000023510	VAPB	VAMP associated protein B and C [Source:NCBI gene;Acc:102176246]	-0.888112	0.000114134	0.00224534	no
chi-miR-493-5p	11_30388771_30408264	circRNA				-0.734316	0.00653792	0.0208088	no
chi-miR-378-5p	5_41858147_41881467	circRNA	ENSCHIG00000026435	CPNE8	copine 8 [Source:NCBI gene;Acc:102190022]	-0.73205	0.00679293	0.0213963	no
chi-miR-381	22_44277031_44317361	circRNA	ENSCHIG00000018878,ENSCHIG00000025264	TASOR,CCDC66		-0.587413	0.0446093	0.0788368	no
chi-miR-34a	13_57238800_57259672	circRNA	ENSCHIG00000023510	VAPB	VAMP associated protein B and C [Source:NCBI gene;Acc:102176246]	-0.825175	0.000951363	0.00690982	no
chi-miR-493-3p	19_41224843_41264566	circRNA				-0.725137	0.00761729	0.0227305	no
chi-miR-3955-5p	24_54467559_54469536	circRNA	ENSCHIG00000016115	RAB27B	RAB27B, member RAS oncogene family [Source:NCBI gene;Acc:102188005]	-0.678322	0.0153173	0.0368991	no
chi-miR-34c-5p	19_41243691_41317024	circRNA				-0.761853	0.00397973	0.0162346	no
chi-miR-29a-3p	24_40253104_40263109	circRNA	ENSCHIG00000022452	ARHGAP28	Rho GTPase activating protein 28 [Source:NCBI gene;Acc:102172677]	-0.916084	2.84e-05	0.00111082	no
chi-miR-23b-3p	18_21745096_21775026	circRNA	ENSCHIG00000014739	NETO2	neuropilin and tolloid like 2 [Source:NCBI gene;Acc:102182820]	-0.866219	0.000268443	0.00357864	no
chi-miR-200a	22_58305714_58404500	circRNA				-0.846154	0.000521134	0.00507581	no
chi-miR-34c-5p	8_72567296_72569854	circRNA	ENSCHIG00000015791	KCTD9	potassium channel tetramerization domain containing 9 [Source:NCBI gene;Acc:102180763]	-0.780057	0.00276436	0.0132032	no
chi-miR-497-5p	12_60568820_60613884	circRNA	ENSCHIG00000024367	NBEA	neurobeachin [Source:NCBI gene;Acc:102186605]	-0.726094	0.00749897	0.0227305	no
chi-miR-378-5p	19_41224623_41264269	circRNA				-0.752674	0.00472788	0.0174375	no
chi-miR-136-5p	23_24033577_24076325	circRNA				-0.665674	0.0181341	0.0422341	no
chi-miR-20a-5p	24_23828087_23885973	circRNA	ENSCHIG00000000206	ASXL3	ASXL transcriptional regulator 3 [Source:NCBI gene;Acc:102185524]	-0.775872	0.00301455	0.0137592	no
chi-miR-135b-5p	3_40056419_40078403	circRNA	ENSCHIG00000012365	CACHD1	cache domain containing 1 [Source:NCBI gene;Acc:102183121]	-0.718975	0.00841326	0.0244407	no
chi-miR-495-3p	21_41963748_41989094	circRNA	ENSCHIG00000010874	ARHGAP5	Rho GTPase activating protein 5 [Source:NCBI gene;Acc:102178574]	-0.739616	0.00596952	0.0202072	no
chi-miR-29a-5p	19_44163401_44165653	circRNA				-0.734266	0.00654349	0.0208088	no
chi-miR-29a-3p	5_115017045_115041174	circRNA	ENSCHIG00000014589	ATXN10	ataxin 10 [Source:NCBI gene;Acc:102177039]	-0.678322	0.0153173	0.0368991	no
chi-miR-17-5p	26_20666895_20672954	circRNA	ENSCHIG00000017120	RBM20	RNA binding motif protein 20 [Source:NCBI gene;Acc:102186742]	-0.807129	0.0015053	0.00917136	no
chi-miR-34c-5p	19_40625362_40635698	circRNA				-0.840413	0.000619568	0.00565106	no
chi-miR-17-5p	24_23828087_23885973	circRNA	ENSCHIG00000000206	ASXL3	ASXL transcriptional regulator 3 [Source:NCBI gene;Acc:102185524]	-0.725114	0.00762017	0.0227305	no
chi-miR-767	8_27506440_27547321	circRNA	ENSCHIG00000026061	BNC2	basonuclin 2 [Source:NCBI gene;Acc:102186591]	-0.839161	0.000642826	0.00565106	no
chi-miR-411b-3p	23_23531594_23581098	circRNA				-0.850971	0.000448294	0.00468596	no
chi-miR-19b-5p	21_23975771_23990240	circRNA	ENSCHIG00000016013	SH3GL3	SH3 domain containing GRB2 like 3, endophilin A3 [Source:NCBI gene;Acc:102168209]	-0.795794	0.00196229	0.0106279	no
chi-miR-362-5p	1_19404630_19454650	circRNA				-0.633552	0.0269747	0.0552864	no
chi-miR-146b-3p	27_26263263_26281959	circRNA	ENSCHIG00000018661	PCM1	pericentriolar material 1 [Source:NCBI gene;Acc:102191676]	-0.636364	0.0260969	0.0536812	no
chi-miR-410-3p	19_41224843_41264566	circRNA				-0.734316	0.00653792	0.0208088	no
chi-miR-338-3p	7_95966409_95973779	circRNA	ENSCHIG00000014171	INSR	insulin receptor [Source:NCBI gene;Acc:102168996]	-0.590785	0.0431005	0.0771456	no
chi-miR-660	13_27614314_27632737	circRNA	ENSCHIG00000000499		pre-mRNA processing factor 18 [Source:NCBI gene;Acc:102174754]	-0.692308	0.012593	0.0322295	no
chi-miR-23a	18_21745096_21775026	circRNA	ENSCHIG00000014739	NETO2	neuropilin and tolloid like 2 [Source:NCBI gene;Acc:102182820]	-0.943685	4.06e-06	0.000394714	no
chi-let-7b-5p	2_29711456_29798577	circRNA				-0.802451	0.00168271	0.00966487	no
chi-miR-200c	LWLT01000021.1_8553591_8594629	circRNA				-0.733012	0.00668381	0.0211851	no
chi-miR-17-5p	6_2399934_2465968	circRNA				-0.6976	0.0116622	0.0306737	no
chi-miR-125b-5p	5_27299842_27329315	circRNA				-0.725137	0.00761729	0.0227305	no
chi-miR-27b-3p	5_105662044_105677440	circRNA				-0.832092	0.000787114	0.00623472	no
chi-miR-128-3p	7_14454570_14464761	circRNA	ENSCHIG00000027166	CAST	calpastatin [Source:NCBI gene;Acc:100861304]	-0.774667	0.00308965	0.0140567	no
chi-miR-146b-5p	8_59812602_59816811	circRNA	ENSCHIG00000013918	TMEM8B	transmembrane protein 8B [Source:NCBI gene;Acc:102182129]	-0.664336	0.0184527	0.0422524	no
chi-miR-145-5p	14_1349025_1356777	circRNA				-0.706294	0.0102452	0.0279658	no
chi-miR-127-5p	19_41224843_41264566	circRNA				-0.725137	0.00761729	0.0227305	no
chi-miR-376b-5p	9_26231856_26242268	circRNA				-0.895105	8.37e-05	0.00191113	no
chi-miR-145-5p	5_61526783_61541794	circRNA	ENSCHIG00000026050	APAF1	apoptotic peptidase activating factor 1 [Source:NCBI gene;Acc:102188830]	-0.664336	0.0184527	0.0422524	no
chi-miR-125a-5p	19_41224623_41243518	circRNA	ENSCHIG00000025510		keratin, type I microfibrillar 48 kDa, component 8C-1 [Source:NCBI gene;Acc:102176726]	-0.725137	0.00761729	0.0227305	no
chi-miR-381	5_41858147_41881467	circRNA	ENSCHIG00000026435	CPNE8	copine 8 [Source:NCBI gene;Acc:102190022]	-0.58494	0.0457391	0.0805966	no
chi-miR-34b-3p	19_41224623_41317024	circRNA				-0.752674	0.00472788	0.0174375	no
chi-miR-378-5p	6_102437660_102447350	circRNA	ENSCHIG00000008450	AFF1	AF4/FMR2 family member 1 [Source:NCBI gene;Acc:102185996]	-0.775924	0.00301135	0.0137592	no
chi-miR-708-5p	2_107548050_107575268	circRNA				-0.767076	0.00359618	0.0155115	no
chi-miR-200c	16_43412593_43466290	circRNA	ENSCHIG00000025014	RERE	arginine-glutamic acid dipeptide repeats [Source:NCBI gene;Acc:102178646]	-0.704029	0.0106012	0.0287848	no
chi-miR-200a	5_105662044_105677440	circRNA				-0.769685	0.00341549	0.0150422	no
chi-let-7g-3p	20_66412881_66426883	circRNA	ENSCHIG00000017328	TENT4A	terminal nucleotidyltransferase 4A [Source:NCBI gene;Acc:102172200]	-0.79021	0.00222314	0.0113699	no
chi-miR-380-3p	19_41224623_41264269	circRNA				-0.734316	0.00653792	0.0208088	no
chi-miR-224-5p	19_41224623_41243518	circRNA	ENSCHIG00000025510		keratin, type I microfibrillar 48 kDa, component 8C-1 [Source:NCBI gene;Acc:102176726]	-0.725137	0.00761729	0.0227305	no
chi-miR-136-5p	6_20095624_20108750	circRNA	ENSCHIG00000008289	PPA2	pyrophosphatase (inorganic) 2 [Source:NCBI gene;Acc:102172978]	-0.710612	0.0095911	0.0267656	no
chi-miR-500-5p	12_40186002_40205920	circRNA	ENSCHIG00000003476	DACH1	dachshund family transcription factor 1 [Source:NCBI gene;Acc:102178371]	-0.704243	0.0105672	0.0287697	no
chi-miR-532-5p	19_41224623_41317024	circRNA				-0.761853	0.00397973	0.0162346	no
chi-miR-214-3p	19_41264441_41317024	circRNA				-0.752674	0.00472788	0.0174375	no
chi-miR-24-3p	11_96714402_96756768	circRNA	ENSCHIG00000013327	MVB12B	multivesicular body subunit 12B [Source:NCBI gene;Acc:102187499]	-0.833626	0.000753851	0.00623472	no
chi-miR-497-5p	23_32008875_32016615	circRNA				-0.725137	0.00761729	0.0227305	no
chi-miR-493-5p	19_41243691_41317024	circRNA				-0.761853	0.00397973	0.0162346	no
chi-miR-130b-3p	17_1790475_1811077	circRNA				-0.761853	0.00397973	0.0162346	no
chi-miR-146b-3p	23_42354033_42406135	circRNA	ENSCHIG00000020109			-0.70182	0.0109574	0.0296367	no
chi-miR-128-3p	19_41264441_41317024	circRNA				-0.752674	0.00472788	0.0174375	no
chi-miR-708-3p	LWLT01000033.1_487666_506588	circRNA	ENSCHIG00000015457	CASK	calcium/calmodulin dependent serine protein kinase [Source:NCBI gene;Acc:102171047]	-0.72537	0.00758833	0.0227305	no
chi-miR-496-5p	6_68272249_68299586	circRNA	ENSCHIG00000024006	DCUN1D4	defective in cullin neddylation 1 domain containing 4 [Source:NCBI gene;Acc:102178894]	-0.643357	0.0240032	0.0507254	no
chi-miR-708-3p	12_60568820_60613884	circRNA	ENSCHIG00000024367	NBEA	neurobeachin [Source:NCBI gene;Acc:102186605]	-0.633552	0.0269747	0.0552864	no
chi-miR-27a-3p	18_41985462_41995049	circRNA				-0.676008	0.0158067	0.0379124	no
chi-miR-378-5p	27_18607920_18650811	circRNA				-0.823119	0.00100495	0.00722237	no
chi-miR-221-3p	10_91508829_91592619	circRNA	ENSCHIG00000014180	LHFPL2	LHFPL tetraspan subfamily member 2 [Source:NCBI gene;Acc:102189127]	-0.591564	0.0427573	0.0766904	no
chi-miR-3431-5p	21_41963748_41989094	circRNA	ENSCHIG00000010874	ARHGAP5	Rho GTPase activating protein 5 [Source:NCBI gene;Acc:102178574]	-0.688858	0.0132287	0.0335749	no
chi-miR-708-3p	28_2965973_2976036	circRNA	ENSCHIG00000025521	MAPK8	mitogen-activated protein kinase 8 [Source:NCBI gene;Acc:100861087]	-0.727273	0.00735503	0.0224232	no
chi-miR-224-5p	23_23531594_23581098	circRNA				-0.862168	0.000309405	0.00393286	no
chi-miR-29c-3p	5_12285972_12338205	circRNA	ENSCHIG00000021548	TMTC2	transmembrane and tetratricopeptide repeat containing 2 [Source:NCBI gene;Acc:102190760]	-0.58042	0.047856	0.0829136	no
chi-miR-27b-3p	23_42333788_42406135	circRNA	ENSCHIG00000020109			-0.873376	0.000206495	0.00311162	no
chi-miR-19b-5p	7_172120_230877	circRNA	ENSCHIG00000011930	CAMK4	calcium/calmodulin dependent protein kinase IV [Source:NCBI gene;Acc:102187484]	-0.615385	0.0331699	0.0636096	no
chi-miR-29a-3p	LWLT01000021.1_53251116_53322201	circRNA	ENSCHIG00000011491	REPS2	RALBP1 associated Eps domain containing 2 [Source:NCBI gene;Acc:102174285]	-0.858145	0.000354759	0.00414931	no
chi-miR-376c-3p	8_27506440_27547321	circRNA	ENSCHIG00000026061	BNC2	basonuclin 2 [Source:NCBI gene;Acc:102186591]	-0.615385	0.0331699	0.0636096	no
chi-miR-412-5p	24_58175423_58177785	circRNA	ENSCHIG00000009576	ZNF532	zinc finger protein 532 [Source:NCBI gene;Acc:102173802]	-0.874126	0.000200713	0.00307419	no
chi-miR-100-3p	29_27757487_27772458	circRNA	ENSCHIG00000006217	CCDC15	coiled-coil domain containing 15 [Source:NCBI gene;Acc:102182948]	-0.637112	0.0258669	0.0536812	no
chi-miR-188-5p	4_41207111_41254724	circRNA	ENSCHIG00000015297	GLI3	GLI family zinc finger 3 [Source:NCBI gene;Acc:102178142]	-0.630849	0.0278388	0.0568577	no
chi-miR-146b-5p	1_44775766_44792088	circRNA	ENSCHIG00000022648		transmembrane protein 45A [Source:NCBI gene;Acc:102180889]	-0.662027	0.0190123	0.0433702	no
chi-miR-135b-5p	14_33358612_33374397	circRNA	ENSCHIG00000015490	TRPS1	transcriptional repressor GATA binding 1 [Source:NCBI gene;Acc:102184827]	-0.706294	0.0102452	0.0279658	no
chi-miR-145-3p	11_21869724_21873258	circRNA	ENSCHIG00000009934	TMEM178A	transmembrane protein 178A [Source:NCBI gene;Acc:102181506]	-0.732413	0.00675165	0.0213375	no
chi-miR-141	13_33128511_33130321	circRNA	ENSCHIG00000016385	ZEB1	zinc finger E-box binding homeobox 1 [Source:NCBI gene;Acc:106502734]	-0.615385	0.0331699	0.0636096	no
chi-miR-758	19_41224843_41264566	circRNA				-0.761853	0.00397973	0.0162346	no
chi-miR-495-3p	3_14571221_14575269	circRNA	ENSCHIG00000013259	TRIT1	tRNA isopentenyltransferase 1 [Source:NCBI gene;Acc:102190093]	-0.739616	0.00596952	0.0202072	no
chi-let-7b-3p	7_84193926_84212544	circRNA	ENSCHIG00000026659	PRRC1	proline rich coiled-coil 1 [Source:NCBI gene;Acc:102185173]	-0.594406	0.0415215	0.0747889	no
chi-miR-532-3p	5_41858147_41881467	circRNA	ENSCHIG00000026435	CPNE8	copine 8 [Source:NCBI gene;Acc:102190022]	-0.760071	0.00411738	0.0166456	no
chi-miR-376e-5p	17_1790475_1833570	circRNA				-0.734316	0.00653792	0.0208088	no
chi-miR-3958-3p	3_75922095_75973157	circRNA	ENSCHIG00000017438		sorting nexin 7 [Source:NCBI gene;Acc:102180557]	-0.629371	0.0283197	0.0569031	no
chi-miR-3431-3p	8_112475884_112495957	circRNA	ENSCHIG00000023106	SH3YL1	SH3 and SYLF domain containing 1 [Source:NCBI gene;Acc:102186310]	-0.886261	0.000123491	0.00239414	no
chi-miR-200c	22_28687216_28699682	circRNA	ENSCHIG00000011713	GXYLT2	glucoside xylosyltransferase 2 [Source:NCBI gene;Acc:102169917]	-0.804398	0.00160704	0.00939149	no
chi-miR-487a-5p	27_18607920_18650811	circRNA				-0.669003	0.0173586	0.0406091	no
chi-miR-211	17_1790475_1833570	circRNA				-0.752674	0.00472788	0.0174375	no
chi-miR-502b-3p	11_30388771_30408264	circRNA				-0.752674	0.00472788	0.0174375	no
chi-miR-214-3p	19_41224623_41264269	circRNA				-0.734316	0.00653792	0.0208088	no
chi-miR-758	19_41264441_41317024	circRNA				-0.761853	0.00397973	0.0162346	no
chi-miR-497-5p	12_35520126_35550205	circRNA	ENSCHIG00000005312	LMO7	LIM domain 7 [Source:NCBI gene;Acc:102182606]	-0.794648	0.00201382	0.0107661	no
chi-miR-381	23_23531594_23581098	circRNA				-0.914421	3.13e-05	0.00118673	no
chi-miR-146b-3p	14_33358612_33374397	circRNA	ENSCHIG00000015490	TRPS1	transcriptional repressor GATA binding 1 [Source:NCBI gene;Acc:102184827]	-0.615385	0.0331699	0.0636096	no
chi-miR-27a-5p	5_30305142_30343396	circRNA				-0.802103	0.00169653	0.00970215	no
chi-miR-34c-5p	19_41264441_41317024	circRNA				-0.752674	0.00472788	0.0174375	no
chi-miR-143-3p	2_91581430_91582895	circRNA	ENSCHIG00000014281	NEB	nebulin [Source:NCBI gene;Acc:102180806]	-0.810992	0.00136996	0.00847686	no
chi-miR-758	4_33600215_33618663	circRNA	ENSCHIG00000009703	AASS	aminoadipate-semialdehyde synthase [Source:NCBI gene;Acc:102185894]	-0.615385	0.0331699	0.0636096	no
chi-miR-135b-5p	14_93232044_93282219	circRNA	ENSCHIG00000011011	RIMS1	regulating synaptic membrane exocytosis 1 [Source:NCBI gene;Acc:102184538]	-0.72028	0.00823977	0.0240034	no
chi-miR-412-5p	7_30567072_30606262	circRNA	ENSCHIG00000025474		teneurin-2 [Source:NCBI gene;Acc:108633191]	-0.880304	0.000157757	0.00269956	no
chi-miR-708-5p	22_58305714_58404500	circRNA				-0.804196	0.00161477	0.00939149	no
chi-miR-502b-3p	6_68272249_68299586	circRNA	ENSCHIG00000024006	DCUN1D4	defective in cullin neddylation 1 domain containing 4 [Source:NCBI gene;Acc:102178894]	-0.755245	0.00450843	0.0174375	no
chi-miR-128-3p	19_30415586_30452644	circRNA	ENSCHIG00000025624	MAP2K4	mitogen-activated protein kinase kinase 4 [Source:NCBI gene;Acc:102175799]	-0.601399	0.0385885	0.0708848	no
chi-miR-125b-5p	19_41224623_41264269	circRNA				-0.725137	0.00761729	0.0227305	no
chi-miR-432-3p	19_41224623_41243518	circRNA	ENSCHIG00000025510		keratin, type I microfibrillar 48 kDa, component 8C-1 [Source:NCBI gene;Acc:102176726]	-0.734316	0.00653792	0.0208088	no
chi-miR-338-3p	18_41985462_41995049	circRNA				-0.58494	0.0457391	0.0805966	no
chi-miR-758	3_75922095_75973157	circRNA	ENSCHIG00000017438		sorting nexin 7 [Source:NCBI gene;Acc:102180557]	-0.706294	0.0102452	0.0279658	no
chi-miR-224-5p	6_102437660_102447350	circRNA	ENSCHIG00000008450	AFF1	AF4/FMR2 family member 1 [Source:NCBI gene;Acc:102185996]	-0.622874	0.030504	0.0602888	no
chi-miR-27b-3p	13_33258516_33272240	circRNA	ENSCHIG00000016385	ZEB1	zinc finger E-box binding homeobox 1 [Source:NCBI gene;Acc:106502734]	-0.825175	0.000951363	0.00690982	no
chi-miR-224-5p	23_24033577_24076325	circRNA				-0.832092	0.000787114	0.00623472	no
chi-miR-381	5_17701229_17705803	circRNA	ENSCHIG00000010170	CEP290	centrosomal protein 290 [Source:NCBI gene;Acc:102170299]	-0.787598	0.00235387	0.0118469	no
chi-miR-502b-3p	6_102317689_102321272	circRNA	ENSCHIG00000008450	AFF1	AF4/FMR2 family member 1 [Source:NCBI gene;Acc:102185996]	-0.644871	0.0235663	0.050512	no
chi-miR-145-3p	6_6537220_6549706	circRNA	ENSCHIG00000012778	MYOZ2	myozenin 2 [Source:NCBI gene;Acc:102169268]	-0.849982	0.00046257	0.00479979	no
chi-miR-27b-5p	2_42407861_42445850	circRNA	ENSCHIG00000007723	PARD3B	par-3 family cell polarity regulator beta [Source:NCBI gene;Acc:102173793]	-0.742734	0.00565303	0.0197721	no
chi-miR-143-3p	9_82862722_82883121	circRNA	ENSCHIG00000023614	FNDC1	fibronectin type III domain containing 1 [Source:NCBI gene;Acc:102170875]	-0.612691	0.0341681	0.0652528	no
chi-miR-130b-5p	19_41224623_41264269	circRNA				-0.725137	0.00761729	0.0227305	no
chi-miR-432-5p	19_41224623_41317024	circRNA				-0.752674	0.00472788	0.0174375	no
chi-miR-378-5p	5_27299842_27329315	circRNA				-0.752674	0.00472788	0.0174375	no
chi-miR-27b-3p	10_91508829_91592619	circRNA	ENSCHIG00000014180	LHFPL2	LHFPL tetraspan subfamily member 2 [Source:NCBI gene;Acc:102189127]	-0.767625	0.00355762	0.0154189	no
chi-miR-767	8_94379232_94407339	circRNA				-0.725137	0.00761729	0.0227305	no
chi-miR-34b-3p	22_44277031_44317361	circRNA	ENSCHIG00000018878,ENSCHIG00000025264	TASOR,CCDC66		-0.678322	0.0153173	0.0368991	no
chi-miR-27b-3p	18_41985462_41995049	circRNA				-0.676008	0.0158067	0.0379124	no
chi-miR-141	16_62008118_62074761	circRNA				-0.85778	0.000359119	0.00414931	no
chi-miR-214-3p	19_41243691_41317024	circRNA				-0.734316	0.00653792	0.0208088	no
chi-miR-500-5p	27_18607920_18650811	circRNA				-0.781087	0.0027053	0.0129429	no
chi-miR-17-5p	12_35520126_35550205	circRNA	ENSCHIG00000005312	LMO7	LIM domain 7 [Source:NCBI gene;Acc:102182606]	-0.81545	0.00122559	0.00811473	no
chi-miR-767	8_55432434_55460431	circRNA	ENSCHIG00000019651	TLE4	TLE family member 4, transcriptional corepressor [Source:NCBI gene;Acc:102171243]	-0.734316	0.00653792	0.0208088	no
chi-miR-485-5p	19_40625362_40635698	circRNA				-0.732241	0.00677118	0.0213651	no
chi-miR-136-5p	2_111987328_111999238	circRNA				-0.734316	0.00653792	0.0208088	no
chi-miR-1185-5p	8_55432434_55460431	circRNA	ENSCHIG00000019651	TLE4	TLE family member 4, transcriptional corepressor [Source:NCBI gene;Acc:102171243]	-0.734316	0.00653792	0.0208088	no
chi-miR-17-5p	8_44255914_44266821	circRNA	ENSCHIG00000006743	PGM5	phosphoglucomutase 5 [Source:NCBI gene;Acc:102179194]	-0.762238	0.00395045	0.0162346	no
chi-miR-708-5p	23_42333788_42392758	circRNA	ENSCHIG00000020109			-0.81545	0.00122559	0.00811473	no
chi-miR-130b-5p	19_41264441_41317024	circRNA				-0.734316	0.00653792	0.0208088	no
chi-miR-500-5p	21_41963748_41989094	circRNA	ENSCHIG00000010874	ARHGAP5	Rho GTPase activating protein 5 [Source:NCBI gene;Acc:102178574]	-0.659854	0.0195502	0.0444171	no
chi-miR-27b-3p	22_58305714_58404500	circRNA				-0.804196	0.00161477	0.00939149	no
chi-let-7b-5p	16_62008118_62074761	circRNA				-0.826588	0.000915842	0.00690982	no
chi-miR-485-5p	21_41963748_41989094	circRNA	ENSCHIG00000010874	ARHGAP5	Rho GTPase activating protein 5 [Source:NCBI gene;Acc:102178574]	-0.681607	0.0146417	0.0360281	no
chi-miR-338-3p	1_44775766_44792088	circRNA	ENSCHIG00000022648		transmembrane protein 45A [Source:NCBI gene;Acc:102180889]	-0.583722	0.0463025	0.0814738	no
chi-miR-592	3_105111861_105202142	circRNA				-0.690481	0.0129267	0.032956	no
chi-miR-412-5p	3_75922095_75973157	circRNA	ENSCHIG00000017438		sorting nexin 7 [Source:NCBI gene;Acc:102180557]	-0.671329	0.0168315	0.0396093	no
chi-miR-29b-5p	2_29711456_29798577	circRNA				-0.791254	0.00217245	0.0113699	no
chi-miR-224-5p	3_71250442_71278523	circRNA	ENSCHIG00000011428	ARHGAP29	Rho GTPase activating protein 29 [Source:NCBI gene;Acc:102185622]	-0.748252	0.00512408	0.0182641	no
chi-miR-2318	23_42333788_42406135	circRNA	ENSCHIG00000020109			-0.74081	0.00584681	0.0199073	no
chi-miR-200a	2_107548050_107575268	circRNA				-0.900177	6.59e-05	0.00171392	no
chi-miR-200a	14_12418438_12425224	circRNA	ENSCHIG00000015977	VIRMA	vir like m6A methyltransferase associated [Source:NCBI gene;Acc:102186498]	-0.692308	0.012593	0.0322295	no
chi-miR-708-3p	3_40056419_40078403	circRNA	ENSCHIG00000012365	CACHD1	cache domain containing 1 [Source:NCBI gene;Acc:102183121]	-0.829313	0.000850228	0.00662363	no
chi-miR-378-3p	1_146914668_146941336	circRNA	ENSCHIG00000016792	RUNX1	runt related transcription factor 1 [Source:NCBI gene;Acc:102178020]	-0.853147	0.000418118	0.00442648	no
chi-let-7b-5p	7_172120_230877	circRNA	ENSCHIG00000011930	CAMK4	calcium/calmodulin dependent protein kinase IV [Source:NCBI gene;Acc:102187484]	-0.587413	0.0446093	0.0788368	no
chi-miR-379-3p	23_23531594_23581098	circRNA				-0.854704	0.000397509	0.00442648	no
chi-miR-27b-3p	22_28687216_28699682	circRNA	ENSCHIG00000011713	GXYLT2	glucoside xylosyltransferase 2 [Source:NCBI gene;Acc:102169917]	-0.847109	0.000506007	0.00507581	no
chi-miR-214-3p	7_30508968_30606262	circRNA	ENSCHIG00000025474		teneurin-2 [Source:NCBI gene;Acc:108633191]	-0.638229	0.0255261	0.0534261	no
chi-miR-188-5p	13_6662199_6671983	circRNA	ENSCHIG00000011776	ISM1	isthmin 1 [Source:NCBI gene;Acc:102184352]	-0.58042	0.047856	0.0829136	no
chi-miR-34c-5p	2_111987328_111999238	circRNA				-0.734316	0.00653792	0.0208088	no
chi-miR-379-5p	2_31619716_31621316	circRNA	ENSCHIG00000022047	XRCC5	X-ray repair cross complementing 5 [Source:NCBI gene;Acc:102185877]	-0.633819	0.0268907	0.0551369	no
chi-miR-338-3p	18_21745096_21775026	circRNA	ENSCHIG00000014739	NETO2	neuropilin and tolloid like 2 [Source:NCBI gene;Acc:102182820]	-0.838049	0.000664043	0.00579651	no
chi-miR-130b-5p	14_35283004_35285207	circRNA	ENSCHIG00000009165	MED30	mediator complex subunit 30 [Source:NCBI gene;Acc:102183081]	-0.707532	0.0100544	0.027921	no
chi-miR-143-3p	22_58305714_58404500	circRNA				-0.636364	0.0260969	0.0536812	no
chi-miR-1185-3p	23_23531594_23581098	circRNA				-0.910689	3.85e-05	0.00132895	no
chi-miR-195-5p	23_42354033_42406135	circRNA	ENSCHIG00000020109			-0.694022	0.0122857	0.0320631	no
chi-miR-17-5p	12_35520126_35552054	circRNA	ENSCHIG00000005312	LMO7	LIM domain 7 [Source:NCBI gene;Acc:102182606]	-0.795396	0.00198009	0.0106691	no
chi-miR-200a	16_43412593_43466290	circRNA	ENSCHIG00000025014	RERE	arginine-glutamic acid dipeptide repeats [Source:NCBI gene;Acc:102178646]	-0.753066	0.00469389	0.0174375	no
chi-miR-188-5p	23_23531594_23581098	circRNA				-0.824845	0.000959803	0.00696349	no
chi-miR-362-5p	23_24033577_24076325	circRNA				-0.794648	0.00201382	0.0107661	no
chi-miR-195-5p	23_42333788_42406135	circRNA	ENSCHIG00000020109			-0.7798	0.00277927	0.0132521	no
chi-miR-338-3p	23_42333788_42406135	circRNA	ENSCHIG00000020109			-0.686224	0.0137298	0.0344654	no
chi-miR-433	7_30508968_30606262	circRNA	ENSCHIG00000025474		teneurin-2 [Source:NCBI gene;Acc:108633191]	-0.753931	0.0046196	0.0174375	no
chi-miR-136-5p	17_1790475_1833570	circRNA				-0.734316	0.00653792	0.0208088	no
chi-miR-200c	3_40056419_40078403	circRNA	ENSCHIG00000012365	CACHD1	cache domain containing 1 [Source:NCBI gene;Acc:102183121]	-0.775924	0.00301135	0.0137592	no
chi-miR-27b-3p	LWLT01000033.1_487666_506588	circRNA	ENSCHIG00000015457	CASK	calcium/calmodulin dependent serine protein kinase [Source:NCBI gene;Acc:102171047]	-0.72537	0.00758833	0.0227305	no
chi-miR-34c-3p	19_41243691_41317024	circRNA				-0.761853	0.00397973	0.0162346	no
chi-miR-338-3p	23_42354033_42406135	circRNA	ENSCHIG00000020109			-0.577052	0.0494774	0.0851876	no
chi-miR-767	19_41264441_41317024	circRNA				-0.752674	0.00472788	0.0174375	no
chi-miR-502b-3p	2_111987328_111999238	circRNA				-0.752674	0.00472788	0.0174375	no
chi-miR-19b-5p	7_172120_202865	circRNA	ENSCHIG00000011930	CAMK4	calcium/calmodulin dependent protein kinase IV [Source:NCBI gene;Acc:102187484]	-0.669031	0.0173522	0.0406091	no
chi-miR-708-3p	7_172120_230877	circRNA	ENSCHIG00000011930	CAMK4	calcium/calmodulin dependent protein kinase IV [Source:NCBI gene;Acc:102187484]	-0.629371	0.0283197	0.0569031	no
chi-miR-143-3p	2_29711456_29798577	circRNA				-0.839774	0.000631345	0.00565106	no
chi-miR-211	1_19404630_19454650	circRNA				-0.5944	0.0415238	0.0747889	no
chi-miR-3959-3p	19_41243691_41317024	circRNA				-0.761853	0.00397973	0.0162346	no
chi-miR-221-5p	5_12285972_12311446	circRNA	ENSCHIG00000021548	TMTC2	transmembrane and tetratricopeptide repeat containing 2 [Source:NCBI gene;Acc:102190760]	-0.678322	0.0153173	0.0368991	no
chi-miR-432-5p	19_41243691_41317024	circRNA				-0.752674	0.00472788	0.0174375	no
chi-miR-224-5p	19_41224623_41264269	circRNA				-0.725137	0.00761729	0.0227305	no
chi-miR-378-3p	28_39102885_39111412	circRNA	ENSCHIG00000015700	MAP3K21	mitogen-activated protein kinase kinase kinase 21 [Source:NCBI gene;Acc:102191110]	-0.713287	0.00920178	0.0258316	no
chi-miR-143-3p	21_23975771_23990240	circRNA	ENSCHIG00000016013	SH3GL3	SH3 domain containing GRB2 like 3, endophilin A3 [Source:NCBI gene;Acc:102168209]	-0.838049	0.000664043	0.00579651	no
chi-miR-432-5p	4_41207111_41254724	circRNA	ENSCHIG00000015297	GLI3	GLI family zinc finger 3 [Source:NCBI gene;Acc:102178142]	-0.754118	0.00460361	0.0174375	no
chi-miR-432-5p	19_41264441_41317024	circRNA				-0.734316	0.00653792	0.0208088	no
chi-miR-497-5p	6_46267159_46293564	circRNA	ENSCHIG00000022041	RBPJ	recombination signal binding protein for immunoglobulin kappa J region [Source:NCBI gene;Acc:102185075]	-0.685315	0.013906	0.0344654	no
chi-miR-24-3p	13_33179100_33272240	circRNA	ENSCHIG00000016385	ZEB1	zinc finger E-box binding homeobox 1 [Source:NCBI gene;Acc:106502734]	-0.811189	0.00136331	0.00845946	no
chi-miR-130b-5p	19_41243691_41317024	circRNA				-0.725137	0.00761729	0.0227305	no
chi-miR-2318	3_119473360_119499163	circRNA	ENSCHIG00000024329	DCAF6	DDB1 and CUL4 associated factor 6 [Source:NCBI gene;Acc:102172777]	-0.761369	0.00401672	0.0163318	no
chi-miR-708-5p	23_42354033_42406135	circRNA	ENSCHIG00000020109			-0.826588	0.000915842	0.00690982	no
chi-miR-125b-5p	19_41224623_41243518	circRNA	ENSCHIG00000025510		keratin, type I microfibrillar 48 kDa, component 8C-1 [Source:NCBI gene;Acc:102176726]	-0.725137	0.00761729	0.0227305	no
chi-miR-1197-3p	19_41224623_41264269	circRNA				-0.752674	0.00472788	0.0174375	no
chi-miR-708-3p	7_14146902_14183277	circRNA	ENSCHIG00000012539	LNPEP	leucyl and cystinyl aminopeptidase [Source:NCBI gene;Acc:102186394]	-0.949899	2.28e-06	0.000317169	no
chi-miR-296-3p	19_41264441_41317024	circRNA				-0.734316	0.00653792	0.0208088	no
chi-miR-200b	19_17783114_17803011	circRNA	ENSCHIG00000021351	CRLF3	cytokine receptor like factor 3 [Source:NCBI gene;Acc:102188795]	-0.629993	0.0281165	0.0569031	no
chi-miR-17-5p	16_63542706_63560758	circRNA	ENSCHIG00000017821	RGL1	ral guanine nucleotide dissociation stimulator like 1 [Source:NCBI gene;Acc:102173025]	-0.678322	0.0153173	0.0368991	no
chi-miR-27a-5p	24_23828087_23885973	circRNA	ENSCHIG00000000206	ASXL3	ASXL transcriptional regulator 3 [Source:NCBI gene;Acc:102185524]	-0.710612	0.0095911	0.0267656	no
chi-miR-376e-5p	8_112475884_112495957	circRNA	ENSCHIG00000023106	SH3YL1	SH3 and SYLF domain containing 1 [Source:NCBI gene;Acc:102186310]	-0.832872	0.000770065	0.00623472	no
chi-miR-655	6_68272249_68299586	circRNA	ENSCHIG00000024006	DCUN1D4	defective in cullin neddylation 1 domain containing 4 [Source:NCBI gene;Acc:102178894]	-0.727273	0.00735503	0.0224232	no
chi-miR-145-3p	16_62008118_62074761	circRNA				-0.85778	0.000359119	0.00414931	no
chi-miR-34c-3p	12_40062027_40121789	circRNA	ENSCHIG00000003476	DACH1	dachshund family transcription factor 1 [Source:NCBI gene;Acc:102178371]	-0.813648	0.00128246	0.00844617	no
chi-miR-497-5p	29_28684057_28729825	circRNA	ENSCHIG00000006678	CDON	cell adhesion associated, oncogene regulated [Source:NCBI gene;Acc:102188923]	-0.755245	0.00450843	0.0174375	no
chi-miR-494	4_41207111_41254724	circRNA	ENSCHIG00000015297	GLI3	GLI family zinc finger 3 [Source:NCBI gene;Acc:102178142]	-0.833881	0.000748445	0.00623472	no
chi-miR-34c-5p	23_24033577_24076325	circRNA				-0.778006	0.00288491	0.0136999	no
chi-miR-105b-5p	9_26231856_26242268	circRNA				-0.608392	0.035806	0.0671753	no
chi-miR-188-5p	9_89761790_89768790	circRNA	ENSCHIG00000022083	AFDN	afadin, adherens junction formation factor [Source:NCBI gene;Acc:106502495]	-0.825175	0.000951363	0.00690982	no
chi-miR-34a	10_91508829_91592619	circRNA	ENSCHIG00000014180	LHFPL2	LHFPL tetraspan subfamily member 2 [Source:NCBI gene;Acc:102189127]	-0.711285	0.00949192	0.0265672	no
chi-miR-296-3p	14_26164890_26175776	circRNA	ENSCHIG00000020722	EMC2	ER membrane protein complex subunit 2 [Source:NCBI gene;Acc:102188239]	-0.643357	0.0240032	0.0507254	no
chi-miR-211	19_41264441_41317024	circRNA				-0.734316	0.00653792	0.0208088	no
chi-miR-221-5p	11_96714402_96756768	circRNA	ENSCHIG00000013327	MVB12B	multivesicular body subunit 12B [Source:NCBI gene;Acc:102187499]	-0.591945	0.0425902	0.0764528	no
chi-miR-504	19_39123932_39131374	circRNA	ENSCHIG00000019675	LASP1	LIM and SH3 protein 1 [Source:NCBI gene;Acc:102177372]	-0.630849	0.0278388	0.0568577	no
chi-miR-412-5p	23_23531594_23581098	circRNA				-0.690481	0.0129267	0.032956	no
chi-miR-27b-5p	14_93232044_93282219	circRNA	ENSCHIG00000011011	RIMS1	regulating synaptic membrane exocytosis 1 [Source:NCBI gene;Acc:102184538]	-0.685315	0.013906	0.0344654	no
chi-miR-381	4_41207111_41254724	circRNA	ENSCHIG00000015297	GLI3	GLI family zinc finger 3 [Source:NCBI gene;Acc:102178142]	-0.761369	0.00401672	0.0163318	no
chi-miR-708-5p	23_42333788_42406135	circRNA	ENSCHIG00000020109			-0.888972	0.00010998	0.00224534	no
chi-miR-27a-3p	13_33179100_33272240	circRNA	ENSCHIG00000016385	ZEB1	zinc finger E-box binding homeobox 1 [Source:NCBI gene;Acc:106502734]	-0.776224	0.00299286	0.0137075	no
chi-miR-500-5p	13_6662199_6686474	circRNA	ENSCHIG00000011776	ISM1	isthmin 1 [Source:NCBI gene;Acc:102184352]	-0.923077	1.86e-05	0.000857647	no
chi-miR-544-5p	8_55432434_55460431	circRNA	ENSCHIG00000019651	TLE4	TLE family member 4, transcriptional corepressor [Source:NCBI gene;Acc:102171243]	-0.752674	0.00472788	0.0174375	no
chi-miR-145-5p	4_58963091_58983051	circRNA	ENSCHIG00000013805	2023-09-07	septin 7 [Source:NCBI gene;Acc:102190377]	-0.725045	0.00762875	0.0227305	no
chi-miR-211	19_41224623_41317024	circRNA				-0.725137	0.00761729	0.0227305	no
chi-miR-128-3p	14_1349025_1357098	circRNA				-0.58042	0.047856	0.0829136	no
chi-miR-532-3p	6_68272249_68299586	circRNA	ENSCHIG00000024006	DCUN1D4	defective in cullin neddylation 1 domain containing 4 [Source:NCBI gene;Acc:102178894]	-0.748252	0.00512408	0.0182641	no
chi-miR-532-3p	5_27299842_27329315	circRNA				-0.734316	0.00653792	0.0208088	no
chi-miR-532-5p	5_41858147_41881467	circRNA	ENSCHIG00000026435	CPNE8	copine 8 [Source:NCBI gene;Acc:102190022]	-0.697024	0.011761	0.0308273	no
chi-miR-34b-3p	19_41243691_41317024	circRNA				-0.752674	0.00472788	0.0174375	no
chi-miR-141	5_105662044_105677440	circRNA				-0.832092	0.000787114	0.00623472	no
chi-miR-193a	13_33258516_33272240	circRNA	ENSCHIG00000016385	ZEB1	zinc finger E-box binding homeobox 1 [Source:NCBI gene;Acc:106502734]	-0.825175	0.000951363	0.00690982	no
chi-miR-329b-3p	5_27299842_27329315	circRNA				-0.725137	0.00761729	0.0227305	no
chi-miR-134	3_75922095_75973157	circRNA	ENSCHIG00000017438		sorting nexin 7 [Source:NCBI gene;Acc:102180557]	-0.65035	0.0220342	0.0476499	no
chi-miR-136-5p	17_1790475_1811077	circRNA				-0.752674	0.00472788	0.0174375	no
chi-miR-146b-3p	23_42333788_42406135	circRNA	ENSCHIG00000020109			-0.756406	0.00441191	0.0174375	no
chi-miR-23b-3p	24_23828087_23885973	circRNA	ENSCHIG00000000206	ASXL3	ASXL transcriptional regulator 3 [Source:NCBI gene;Acc:102185524]	-0.819379	0.00110835	0.00771266	no
chi-miR-146b-5p	4_28177351_28196356	circRNA	ENSCHIG00000023390	SND1	staphylococcal nuclease and tudor domain containing 1 [Source:NCBI gene;Acc:102172121]	-0.768621	0.00348837	0.0151718	no
chi-miR-34c-5p	8_27506440_27547321	circRNA	ENSCHIG00000026061	BNC2	basonuclin 2 [Source:NCBI gene;Acc:102186591]	-0.727273	0.00735503	0.0224232	no
chi-miR-211	11_30388771_30408264	circRNA				-0.752674	0.00472788	0.0174375	no
chi-miR-758	19_41224623_41243518	circRNA	ENSCHIG00000025510		keratin, type I microfibrillar 48 kDa, component 8C-1 [Source:NCBI gene;Acc:102176726]	-0.752674	0.00472788	0.0174375	no
chi-miR-378-3p	9_2488189_2504251	circRNA	ENSCHIG00000009406	SENP6	SUMO specific peptidase 6 [Source:NCBI gene;Acc:102188944]	-0.706294	0.0102452	0.0279658	no
chi-miR-487a-3p	12_40186002_40205920	circRNA	ENSCHIG00000003476	DACH1	dachshund family transcription factor 1 [Source:NCBI gene;Acc:102178371]	-0.767625	0.00355762	0.0154189	no
chi-miR-24-3p	7_87786751_87807127	circRNA	ENSCHIG00000020997	FNIP1	folliculin interacting protein 1 [Source:NCBI gene;Acc:102182584]	-0.753066	0.00469389	0.0174375	no
chi-miR-432-3p	19_41264441_41317024	circRNA				-0.725137	0.00761729	0.0227305	no
chi-miR-497-5p	7_86121160_86143481	circRNA	ENSCHIG00000018817	ADAMTS19	ADAM metallopeptidase with thrombospondin type 1 motif 19 [Source:NCBI gene;Acc:102170967]	-0.78171	0.00267007	0.0128393	no
chi-miR-494	5_41858147_41881467	circRNA	ENSCHIG00000026435	CPNE8	copine 8 [Source:NCBI gene;Acc:102190022]	-0.71804	0.00853932	0.024677	no
chi-miR-3431-5p	7_30567072_30606262	circRNA	ENSCHIG00000025474		teneurin-2 [Source:NCBI gene;Acc:108633191]	-0.746497	0.00528802	0.0187575	no
chi-miR-19b-5p	5_30305142_30343396	circRNA				-0.71804	0.00853932	0.024677	no
chi-miR-338-3p	5_30305142_30343396	circRNA				-0.630474	0.0279603	0.0569031	no
chi-miR-497-5p	3_15759071_15766136	circRNA	ENSCHIG00000024918	SCMH1	Scm polycomb group protein homolog 1 [Source:NCBI gene;Acc:102181748]	-0.636364	0.0260969	0.0536812	no
chi-miR-29b-5p	18_21745096_21775026	circRNA	ENSCHIG00000014739	NETO2	neuropilin and tolloid like 2 [Source:NCBI gene;Acc:102182820]	-0.647903	0.0227091	0.0488963	no
chi-miR-378-5p	3_85681727_85709217	circRNA				-0.67182	0.0167217	0.0396093	no
chi-miR-432-3p	19_41224623_41264269	circRNA				-0.734316	0.00653792	0.0208088	no
chi-miR-378-5p	18_37371228_37380440	circRNA	ENSCHIG00000018029	CDH1	cadherin 1 [Source:NCBI gene;Acc:102170451]	-0.783217	0.00258622	0.0125455	no
chi-miR-27b-5p	18_21745096_21775026	circRNA	ENSCHIG00000014739	NETO2	neuropilin and tolloid like 2 [Source:NCBI gene;Acc:102182820]	-0.894388	8.65e-05	0.0019613	no
chi-miR-758	19_41243691_41317024	circRNA				-0.752674	0.00472788	0.0174375	no
chi-miR-485-3p	8_27506440_27547321	circRNA	ENSCHIG00000026061	BNC2	basonuclin 2 [Source:NCBI gene;Acc:102186591]	-0.748252	0.00512408	0.0182641	no
chi-miR-338-3p	7_106070143_106081450	circRNA	ENSCHIG00000026141	OBSCN	obscurin, cytoskeletal calmodulin and titin-interacting RhoGEF [Source:NCBI gene;Acc:106502252]	-0.61499	0.033315	0.0638385	no
chi-miR-188-5p	5_27299842_27329315	circRNA				-0.734316	0.00653792	0.0208088	no
chi-miR-24-3p	6_2399934_2465968	circRNA				-0.752674	0.00472788	0.0174375	no
chi-miR-130b-5p	6_102317689_102321272	circRNA	ENSCHIG00000008450	AFF1	AF4/FMR2 family member 1 [Source:NCBI gene;Acc:102185996]	-0.72392	0.00776983	0.0231162	no
chi-miR-432-5p	12_40062027_40121789	circRNA	ENSCHIG00000003476	DACH1	dachshund family transcription factor 1 [Source:NCBI gene;Acc:102178371]	-0.806183	0.00153995	0.00936809	no
chi-miR-338-3p	LWLT01000021.1_51692245_51705256	circRNA				-0.615385	0.0331699	0.0636096	no
chi-miR-17-5p	5_7374069_7389105	circRNA	ENSCHIG00000012255	NAV3	neuron navigator 3 [Source:NCBI gene;Acc:102182566]	-0.683382	0.014286	0.0353631	no
chi-miR-338-3p	24_41071359_41083479	circRNA	ENSCHIG00000015240	PTPRM	protein tyrosine phosphatase, receptor type M [Source:NCBI gene;Acc:102173248]	-0.706294	0.0102452	0.0279658	no
chi-miR-362-5p	4_41207111_41254724	circRNA	ENSCHIG00000015297	GLI3	GLI family zinc finger 3 [Source:NCBI gene;Acc:102178142]	-0.775872	0.00301455	0.0137592	no
chi-miR-411a-3p	20_39057022_39061849	circRNA	ENSCHIG00000010864	PRLR	prolactin receptor [Source:NCBI gene;Acc:100861318]	-0.612961	0.0340673	0.0651041	no
chi-miR-125b-5p	19_40625362_40635698	circRNA				-0.694797	0.0121486	0.031768	no
chi-miR-495-3p	12_40062027_40121789	circRNA	ENSCHIG00000003476	DACH1	dachshund family transcription factor 1 [Source:NCBI gene;Acc:102178371]	-0.690481	0.0129267	0.032956	no
chi-miR-145-5p	10_91508829_91592619	circRNA	ENSCHIG00000014180	LHFPL2	LHFPL tetraspan subfamily member 2 [Source:NCBI gene;Acc:102189127]	-0.626776	0.0291781	0.0583385	no
chi-miR-141	10_91508829_91592619	circRNA	ENSCHIG00000014180	LHFPL2	LHFPL tetraspan subfamily member 2 [Source:NCBI gene;Acc:102189127]	-0.746497	0.00528802	0.0187575	no
chi-miR-708-5p	7_85052007_85118197	circRNA	ENSCHIG00000013312	FBN2	fibrillin 2 [Source:NCBI gene;Acc:102173553]	-0.881119	0.000152674	0.00263758	no
chi-miR-493-5p	12_40062027_40121789	circRNA	ENSCHIG00000003476	DACH1	dachshund family transcription factor 1 [Source:NCBI gene;Acc:102178371]	-0.731537	0.00685173	0.021561	no
chi-miR-34a	2_42407861_42445850	circRNA	ENSCHIG00000007723	PARD3B	par-3 family cell polarity regulator beta [Source:NCBI gene;Acc:102173793]	-0.724072	0.00775063	0.023066	no
chi-miR-154b-5p	7_30508968_30606262	circRNA	ENSCHIG00000025474		teneurin-2 [Source:NCBI gene;Acc:108633191]	-0.668087	0.0175694	0.0410731	no
chi-miR-27b-5p	2_91581430_91582895	circRNA	ENSCHIG00000014281	NEB	nebulin [Source:NCBI gene;Acc:102180806]	-0.842184	0.00058779	0.00558527	no
chi-miR-146b-3p	3_119473360_119499163	circRNA	ENSCHIG00000024329	DCAF6	DDB1 and CUL4 associated factor 6 [Source:NCBI gene;Acc:102172777]	-0.725114	0.00762017	0.0227305	no
chi-miR-146b-5p	2_29711456_29798577	circRNA				-0.619567	0.0316615	0.0618888	no
chi-miR-29c-3p	18_21745096_21775026	circRNA	ENSCHIG00000014739	NETO2	neuropilin and tolloid like 2 [Source:NCBI gene;Acc:102182820]	-0.922558	1.92e-05	0.000874006	no
chi-miR-708-5p	10_91508829_91592619	circRNA	ENSCHIG00000014180	LHFPL2	LHFPL tetraspan subfamily member 2 [Source:NCBI gene;Acc:102189127]	-0.732413	0.00675165	0.0213375	no
chi-miR-17-5p	5_33471247_33488926	circRNA				-0.71804	0.00853932	0.024677	no
chi-miR-221-5p	3_26908088_26924264	circRNA	ENSCHIG00000023944	TUT4	terminal uridylyl transferase 4 [Source:NCBI gene;Acc:102184303]	-0.633819	0.0268907	0.0551369	no
chi-miR-188-5p	10_51560088_51583797	circRNA	ENSCHIG00000007232	ADAM10	ADAM metallopeptidase domain 10 [Source:NCBI gene;Acc:102172903]	-0.601399	0.0385885	0.0708848	no
chi-miR-411b-5p	6_72912630_72916918	circRNA	ENSCHIG00000015747			-0.880304	0.000157757	0.00269956	no
chi-miR-497-5p	16_20403453_20432602	circRNA	ENSCHIG00000022660	TGFB2	transforming growth factor beta 2 [Source:NCBI gene;Acc:100861228]	-0.654946	0.0208059	0.0460228	no
chi-miR-221-5p	22_58305714_58404500	circRNA				-0.671329	0.0168315	0.0396093	no
chi-miR-338-3p	7_14146902_14183277	circRNA	ENSCHIG00000012539	LNPEP	leucyl and cystinyl aminopeptidase [Source:NCBI gene;Acc:102186394]	-0.732365	0.00675706	0.0213375	no
chi-miR-432-5p	8_94379232_94407339	circRNA				-0.761853	0.00397973	0.0162346	no
chi-miR-376b-5p	17_1790475_1811077	circRNA				-0.752674	0.00472788	0.0174375	no
chi-miR-27a-5p	5_87777483_87780399	circRNA	ENSCHIG00000025590	PDE3A	phosphodiesterase 3A [Source:NCBI gene;Acc:102168704]	-0.659854	0.0195502	0.0444171	no
chi-miR-3955-3p	19_41264441_41317024	circRNA				-0.734316	0.00653792	0.0208088	no
chi-miR-767	19_41224623_41317024	circRNA				-0.734316	0.00653792	0.0208088	no
chi-miR-34c-3p	19_41264441_41317024	circRNA				-0.752674	0.00472788	0.0174375	no
chi-miR-767	7_14454570_14464761	circRNA	ENSCHIG00000027166	CAST	calpastatin [Source:NCBI gene;Acc:100861304]	-0.704243	0.0105672	0.0287697	no
chi-miR-146b-3p	5_61526783_61541794	circRNA	ENSCHIG00000026050	APAF1	apoptotic peptidase activating factor 1 [Source:NCBI gene;Acc:102188830]	-0.923077	1.86e-05	0.000857647	no
chi-miR-193b-3p	23_42333788_42406135	circRNA	ENSCHIG00000020109			-0.85778	0.000359119	0.00414931	no
chi-miR-146b-5p	2_107548050_107575268	circRNA				-0.893171	9.14e-05	0.00206548	no
chi-miR-708-3p	7_85052007_85118197	circRNA	ENSCHIG00000013312	FBN2	fibrillin 2 [Source:NCBI gene;Acc:102173553]	-0.944056	3.93e-06	0.000389781	no
chi-miR-143-5p	5_30305142_30343396	circRNA				-0.58494	0.0457391	0.0805966	no
chi-miR-378-3p	7_30508968_30606262	circRNA	ENSCHIG00000025474		teneurin-2 [Source:NCBI gene;Acc:108633191]	-0.716608	0.00873505	0.0251546	no
chi-miR-767	23_24035889_24054601	circRNA				-0.725137	0.00761729	0.0227305	no
chi-miR-432-5p	1_146914668_146941336	circRNA	ENSCHIG00000016792	RUNX1	runt related transcription factor 1 [Source:NCBI gene;Acc:102178020]	-0.825175	0.000951363	0.00690982	no
chi-miR-27b-3p	2_42407861_42445850	circRNA	ENSCHIG00000007723	PARD3B	par-3 family cell polarity regulator beta [Source:NCBI gene;Acc:102173793]	-0.683017	0.0143587	0.0354035	no
chi-miR-141	LWLT01000042.1_310269_326220	circRNA	ENSCHIG00000000152	MAPK1	mitogen-activated protein kinase 1 [Source:NCBI gene;Acc:102186040]	-0.832168	0.000785442	0.00623472	no
chi-miR-708-5p	5_7374069_7389105	circRNA	ENSCHIG00000012255	NAV3	neuron navigator 3 [Source:NCBI gene;Acc:102182566]	-0.718975	0.00841326	0.0244407	no
chi-miR-410-3p	19_41243691_41317024	circRNA				-0.725137	0.00761729	0.0227305	no
chi-miR-429	2_129205844_129210008	circRNA	ENSCHIG00000012434	COL5A2	collagen type V alpha 2 chain [Source:HGNC Symbol;Acc:HGNC:2210]	-0.721542	0.00807444	0.0239435	no
chi-miR-708-5p	4_28177351_28196356	circRNA	ENSCHIG00000023390	SND1	staphylococcal nuclease and tudor domain containing 1 [Source:NCBI gene;Acc:102172121]	-0.768621	0.00348837	0.0151718	no
chi-miR-193a	23_42333788_42392758	circRNA	ENSCHIG00000020109			-0.81545	0.00122559	0.00811473	no
chi-miR-532-3p	17_1790475_1811077	circRNA				-0.752674	0.00472788	0.0174375	no
chi-miR-378-5p	24_26288144_26291014	circRNA	ENSCHIG00000006661	DSC1	desmocollin 1 [Source:NCBI gene;Acc:102183746]	-0.685315	0.013906	0.0344654	no
chi-miR-296-3p	19_41243691_41317024	circRNA				-0.725137	0.00761729	0.0227305	no
chi-miR-20a-5p	16_63542706_63560758	circRNA	ENSCHIG00000017821	RGL1	ral guanine nucleotide dissociation stimulator like 1 [Source:NCBI gene;Acc:102173025]	-0.706294	0.0102452	0.0279658	no
chi-miR-376e-5p	17_1790475_1811077	circRNA				-0.752674	0.00472788	0.0174375	no
chi-miR-20a-5p	6_46267159_46293564	circRNA	ENSCHIG00000022041	RBPJ	recombination signal binding protein for immunoglobulin kappa J region [Source:NCBI gene;Acc:102185075]	-0.587413	0.0446093	0.0788368	no
chi-miR-532-3p	17_1790475_1833570	circRNA				-0.734316	0.00653792	0.0208088	no
chi-miR-130b-3p	17_1790475_1833570	circRNA				-0.752674	0.00472788	0.0174375	no
chi-miR-127-5p	19_41243691_41317024	circRNA				-0.734316	0.00653792	0.0208088	no
chi-miR-146b-5p	3_119473360_119499163	circRNA	ENSCHIG00000024329	DCAF6	DDB1 and CUL4 associated factor 6 [Source:NCBI gene;Acc:102172777]	-0.725114	0.00762017	0.0227305	no
chi-miR-27a-3p	10_91508829_91592619	circRNA	ENSCHIG00000014180	LHFPL2	LHFPL tetraspan subfamily member 2 [Source:NCBI gene;Acc:102189127]	-0.746497	0.00528802	0.0187575	no
chi-miR-380-3p	19_41224623_41243518	circRNA	ENSCHIG00000025510		keratin, type I microfibrillar 48 kDa, component 8C-1 [Source:NCBI gene;Acc:102176726]	-0.734316	0.00653792	0.0208088	no
chi-miR-145-5p	22_28687216_28699682	circRNA	ENSCHIG00000011713	GXYLT2	glucoside xylosyltransferase 2 [Source:NCBI gene;Acc:102169917]	-0.622874	0.030504	0.0602888	no
chi-miR-432-5p	17_1790475_1811077	circRNA				-0.734316	0.00653792	0.0208088	no
chi-miR-20a-5p	8_44255914_44266821	circRNA	ENSCHIG00000006743	PGM5	phosphoglucomutase 5 [Source:NCBI gene;Acc:102179194]	-0.797203	0.00190037	0.0103462	no
chi-miR-497-5p	3_40056419_40078403	circRNA	ENSCHIG00000012365	CACHD1	cache domain containing 1 [Source:NCBI gene;Acc:102183121]	-0.751009	0.00487425	0.0179473	no
chi-miR-502b-3p	13_6662199_6686474	circRNA	ENSCHIG00000011776	ISM1	isthmin 1 [Source:NCBI gene;Acc:102184352]	-0.874126	0.000200713	0.00307419	no
chi-miR-200b	16_43412593_43466290	circRNA	ENSCHIG00000025014	RERE	arginine-glutamic acid dipeptide repeats [Source:NCBI gene;Acc:102178646]	-0.711034	0.00952876	0.026614	no
chi-miR-141	11_96714402_96756768	circRNA	ENSCHIG00000013327	MVB12B	multivesicular body subunit 12B [Source:NCBI gene;Acc:102187499]	-0.788092	0.00232868	0.0117679	no
chi-miR-338-3p	LWLT01000033.1_487666_506588	circRNA	ENSCHIG00000015457	CASK	calcium/calmodulin dependent serine protein kinase [Source:NCBI gene;Acc:102171047]	-0.683116	0.014339	0.0354035	no
chi-miR-130b-3p	19_41264441_41317024	circRNA				-0.734316	0.00653792	0.0208088	no
chi-miR-493-5p	19_41224623_41264269	circRNA				-0.761853	0.00397973	0.0162346	no
chi-miR-338-3p	7_106071302_106083419	circRNA	ENSCHIG00000026141	OBSCN	obscurin, cytoskeletal calmodulin and titin-interacting RhoGEF [Source:NCBI gene;Acc:106502252]	-0.740562	0.00587214	0.0199524	no
chi-miR-17-5p	2_29711456_29798577	circRNA				-0.705411	0.010383	0.0283146	no
chi-miR-27a-5p	2_42407861_42445850	circRNA	ENSCHIG00000007723	PARD3B	par-3 family cell polarity regulator beta [Source:NCBI gene;Acc:102173793]	-0.686749	0.0136288	0.0344654	no
chi-let-7g-3p	29_28684057_28729825	circRNA	ENSCHIG00000006678	CDON	cell adhesion associated, oncogene regulated [Source:NCBI gene;Acc:102188923]	-0.797203	0.00190037	0.0103462	no
chi-miR-502b-3p	19_41243691_41317024	circRNA				-0.752674	0.00472788	0.0174375	no
chi-miR-429	16_43412593_43466290	circRNA	ENSCHIG00000025014	RERE	arginine-glutamic acid dipeptide repeats [Source:NCBI gene;Acc:102178646]	-0.73205	0.00679293	0.0213963	no
chi-miR-188-5p	7_30508968_30606262	circRNA	ENSCHIG00000025474		teneurin-2 [Source:NCBI gene;Acc:108633191]	-0.612102	0.0343893	0.0656372	no
chi-miR-200a	5_12285972_12311446	circRNA	ENSCHIG00000021548	TMTC2	transmembrane and tetratricopeptide repeat containing 2 [Source:NCBI gene;Acc:102190760]	-0.699301	0.0113742	0.0299838	no
chi-miR-105b-5p	26_11416825_11423745	circRNA	ENSCHIG00000013810	PLPP4	phospholipid phosphatase 4 [Source:NCBI gene;Acc:102169156]	-0.638229	0.0255261	0.0534261	no
chi-miR-135b-5p	7_14146902_14183277	circRNA	ENSCHIG00000012539	LNPEP	leucyl and cystinyl aminopeptidase [Source:NCBI gene;Acc:102186394]	-0.790374	0.00221511	0.0113699	no
chi-miR-34a	6_2399934_2465968	circRNA				-0.761853	0.00397973	0.0162346	no
chi-miR-497-5p	7_172120_202865	circRNA	ENSCHIG00000011930	CAMK4	calcium/calmodulin dependent protein kinase IV [Source:NCBI gene;Acc:102187484]	-0.802837	0.00166751	0.00960534	no
chi-miR-497-5p	5_30305142_30343396	circRNA				-0.777584	0.00291017	0.0137075	no
chi-miR-29a-3p	10_91508829_91592619	circRNA	ENSCHIG00000014180	LHFPL2	LHFPL tetraspan subfamily member 2 [Source:NCBI gene;Acc:102189127]	-0.711285	0.00949192	0.0265672	no
chi-miR-378-3p	6_20095624_20108750	circRNA	ENSCHIG00000008289	PPA2	pyrophosphatase (inorganic) 2 [Source:NCBI gene;Acc:102172978]	-0.580091	0.0480125	0.0831485	no
chi-miR-23a	24_23828087_23885973	circRNA	ENSCHIG00000000206	ASXL3	ASXL transcriptional regulator 3 [Source:NCBI gene;Acc:102185524]	-0.768621	0.00348837	0.0151718	no
chi-miR-433	7_30567072_30606262	circRNA	ENSCHIG00000025474		teneurin-2 [Source:NCBI gene;Acc:108633191]	-0.78171	0.00267007	0.0128393	no
chi-miR-329a-3p	3_34947311_34971589	circRNA				-0.91769	2.59e-05	0.00111082	no
chi-miR-23a	LWLT01000021.1_51692245_51705256	circRNA				-0.804196	0.00161477	0.00939149	no
chi-miR-432-5p	6_68272249_68299586	circRNA	ENSCHIG00000024006	DCUN1D4	defective in cullin neddylation 1 domain containing 4 [Source:NCBI gene;Acc:102178894]	-0.832168	0.000785442	0.00623472	no
chi-miR-143-3p	12_35520126_35550205	circRNA	ENSCHIG00000005312	LMO7	LIM domain 7 [Source:NCBI gene;Acc:102182606]	-0.694797	0.0121486	0.031768	no
chi-miR-193a	2_29711456_29798577	circRNA				-0.787522	0.00235775	0.0118485	no
chi-miR-195-5p	16_43412593_43466290	circRNA	ENSCHIG00000025014	RERE	arginine-glutamic acid dipeptide repeats [Source:NCBI gene;Acc:102178646]	-0.760071	0.00411738	0.0166456	no
chi-miR-193b-3p	13_33179100_33272240	circRNA	ENSCHIG00000016385	ZEB1	zinc finger E-box binding homeobox 1 [Source:NCBI gene;Acc:106502734]	-0.832168	0.000785442	0.00623472	no
chi-miR-544-5p	1_20724717_20751874	circRNA				-0.598606	0.0397413	0.0726729	no
chi-miR-1197-3p	19_41224843_41264566	circRNA				-0.734316	0.00653792	0.0208088	no
chi-miR-93-5p	11_96714402_96756768	circRNA	ENSCHIG00000013327	MVB12B	multivesicular body subunit 12B [Source:NCBI gene;Acc:102187499]	-0.704029	0.0106012	0.0287848	no
chi-miR-3431-5p	7_30508968_30606262	circRNA	ENSCHIG00000025474		teneurin-2 [Source:NCBI gene;Acc:108633191]	-0.787522	0.00235775	0.0118485	no
chi-let-7g-3p	5_33471247_33488926	circRNA				-0.686516	0.0136736	0.0344654	no
chi-miR-338-3p	19_18405450_18435938	circRNA	ENSCHIG00000010629	NF1	neurofibromin 1 [Source:NCBI gene;Acc:102183001]	-0.655032	0.0207834	0.0460228	no
chi-miR-532-3p	19_30415586_30452644	circRNA	ENSCHIG00000025624	MAP2K4	mitogen-activated protein kinase kinase 4 [Source:NCBI gene;Acc:102175799]	-0.643357	0.0240032	0.0507254	no
chi-miR-214-3p	19_30415586_30452644	circRNA	ENSCHIG00000025624	MAP2K4	mitogen-activated protein kinase kinase 4 [Source:NCBI gene;Acc:102175799]	-0.734266	0.00654349	0.0208088	no
chi-miR-27a-5p	5_87769796_87780399	circRNA	ENSCHIG00000025590	PDE3A	phosphodiesterase 3A [Source:NCBI gene;Acc:102168704]	-0.881119	0.000152674	0.00263758	no
chi-miR-19b-5p	1_151487374_151491495	circRNA	ENSCHIG00000018630	COL6A6	collagen type VI alpha 6 chain [Source:NCBI gene;Acc:102178401]	-0.862168	0.000309405	0.00393286	no
chi-miR-296-3p	23_24033577_24076325	circRNA				-0.719759	0.00830862	0.0241721	no
chi-miR-1197-3p	5_43950436_43963546	circRNA	ENSCHIG00000010792	CPSF6	cleavage and polyadenylation specific factor 6 [Source:NCBI gene;Acc:102186747]	-0.881119	0.000152674	0.00263758	no
chi-let-7g-3p	3_26908088_26924264	circRNA	ENSCHIG00000023944	TUT4	terminal uridylyl transferase 4 [Source:NCBI gene;Acc:102184303]	-0.711285	0.00949192	0.0265672	no
chi-miR-27a-3p	18_21745096_21775026	circRNA	ENSCHIG00000014739	NETO2	neuropilin and tolloid like 2 [Source:NCBI gene;Acc:102182820]	-0.915516	2.94e-05	0.00112566	no
chi-miR-195-5p	10_91508829_91592619	circRNA	ENSCHIG00000014180	LHFPL2	LHFPL tetraspan subfamily member 2 [Source:NCBI gene;Acc:102189127]	-0.669031	0.0173522	0.0406091	no
chi-miR-338-3p	12_35520126_35550205	circRNA	ENSCHIG00000005312	LMO7	LIM domain 7 [Source:NCBI gene;Acc:102182606]	-0.590785	0.0431005	0.0771456	no
chi-miR-432-5p	10_87716946_87720801	circRNA	ENSCHIG00000012651	SMAD6	SMAD family member 6 [Source:NCBI gene;Acc:102169389]	-0.601399	0.0385885	0.0708848	no
chi-miR-338-3p	3_63276860_63312137	circRNA	ENSCHIG00000020640	COL24A1	collagen type XXIV alpha 1 chain [Source:NCBI gene;Acc:102185420]	-0.686941	0.0135919	0.0344654	no
chi-miR-532-5p	23_24033577_24076325	circRNA				-0.81545	0.00122559	0.00811473	no
chi-miR-224-5p	19_41264441_41317024	circRNA				-0.734316	0.00653792	0.0208088	no
chi-miR-758	5_41858147_41881467	circRNA	ENSCHIG00000026435	CPNE8	copine 8 [Source:NCBI gene;Acc:102190022]	-0.746061	0.00532944	0.0188472	no
chi-miR-221-3p	7_172120_202865	circRNA	ENSCHIG00000011930	CAMK4	calcium/calmodulin dependent protein kinase IV [Source:NCBI gene;Acc:102187484]	-0.683116	0.014339	0.0354035	no
chi-miR-379-5p	17_1790475_1811077	circRNA				-0.734316	0.00653792	0.0208088	no
chi-miR-200b	LWLT01000021.1_8553591_8594629	circRNA				-0.748608	0.00509129	0.0182641	no
chi-miR-200a	7_85052007_85118197	circRNA	ENSCHIG00000013312	FBN2	fibrillin 2 [Source:NCBI gene;Acc:102173553]	-0.944056	3.93e-06	0.000389781	no
chi-miR-105a	22_44277031_44317361	circRNA	ENSCHIG00000018878,ENSCHIG00000025264	TASOR,CCDC66		-0.741259	0.00580115	0.0197721	no
chi-miR-708-5p	23_42354033_42376610	circRNA	ENSCHIG00000020109			-0.81545	0.00122559	0.00811473	no
chi-miR-127-5p	3_85681727_85709217	circRNA				-0.597173	0.0403425	0.0737316	no
chi-miR-502b-3p	17_1790475_1811077	circRNA				-0.734316	0.00653792	0.0208088	no
chi-miR-105a	3_85681727_85709217	circRNA				-0.664355	0.0184481	0.0422524	no
chi-miR-27b-3p	18_21745096_21775026	circRNA	ENSCHIG00000014739	NETO2	neuropilin and tolloid like 2 [Source:NCBI gene;Acc:102182820]	-0.929601	1.21e-05	0.000722885	no
chi-miR-432-3p	17_1790475_1811077	circRNA				-0.752674	0.00472788	0.0174375	no
chi-miR-429	5_30305142_30343396	circRNA				-0.735553	0.00640179	0.0208088	no
chi-miR-193b-3p	10_96332805_96348625	circRNA	ENSCHIG00000025037	LVRN	laeverin [Source:NCBI gene;Acc:102185571]	-0.591564	0.0427573	0.0766904	no
chi-miR-432-3p	19_41224843_41264566	circRNA				-0.725137	0.00761729	0.0227305	no
chi-miR-193a	13_33179100_33272240	circRNA	ENSCHIG00000016385	ZEB1	zinc finger E-box binding homeobox 1 [Source:NCBI gene;Acc:106502734]	-0.832168	0.000785442	0.00623472	no
chi-miR-338-3p	16_43412593_43466290	circRNA	ENSCHIG00000025014	RERE	arginine-glutamic acid dipeptide repeats [Source:NCBI gene;Acc:102178646]	-0.697024	0.011761	0.0308273	no
chi-miR-93-5p	19_18405450_18435938	circRNA	ENSCHIG00000010629	NF1	neurofibromin 1 [Source:NCBI gene;Acc:102183001]	-0.810992	0.00136996	0.00847686	no
chi-miR-1185-3p	19_41224623_41317024	circRNA				-0.725137	0.00761729	0.0227305	no
chi-miR-130b-3p	19_41243691_41317024	circRNA				-0.725137	0.00761729	0.0227305	no
chi-miR-34a	7_172120_230877	circRNA	ENSCHIG00000011930	CAMK4	calcium/calmodulin dependent protein kinase IV [Source:NCBI gene;Acc:102187484]	-0.608392	0.035806	0.0671753	no
chi-miR-500-5p	7_30508968_30606262	circRNA	ENSCHIG00000025474		teneurin-2 [Source:NCBI gene;Acc:108633191]	-0.675552	0.0159045	0.0381148	no
chi-miR-146b-5p	5_87769796_87780399	circRNA	ENSCHIG00000025590	PDE3A	phosphodiesterase 3A [Source:NCBI gene;Acc:102168704]	-0.776224	0.00299286	0.0137075	no
chi-miR-193b-3p	24_23828087_23885973	circRNA	ENSCHIG00000000206	ASXL3	ASXL transcriptional regulator 3 [Source:NCBI gene;Acc:102185524]	-0.841132	0.000606506	0.00565106	no
chi-miR-493-5p	7_30508968_30606262	circRNA	ENSCHIG00000025474		teneurin-2 [Source:NCBI gene;Acc:108633191]	-0.798719	0.00183541	0.0103462	no
chi-miR-296-3p	1_20724717_20751874	circRNA				-0.619734	0.0316024	0.0617855	no
chi-miR-504	8_55432434_55460431	circRNA	ENSCHIG00000019651	TLE4	TLE family member 4, transcriptional corepressor [Source:NCBI gene;Acc:102171243]	-0.725137	0.00761729	0.0227305	no
chi-miR-214-3p	17_1790475_1811077	circRNA				-0.752674	0.00472788	0.0174375	no
chi-miR-708-5p	19_45922248_45924701	circRNA	ENSCHIG00000015146	MYL4	myosin light chain 4 [Source:NCBI gene;Acc:102168763]	-0.694022	0.0122857	0.0320631	no
chi-miR-211	16_54872062_54880782	circRNA	ENSCHIG00000016451	TNN	tenascin N [Source:NCBI gene;Acc:102181229]	-0.734316	0.00653792	0.0208088	no
chi-miR-193b-3p	6_2399934_2465968	circRNA				-0.761853	0.00397973	0.0162346	no
chi-miR-34c-5p	3_85681727_85709217	circRNA				-0.731537	0.00685173	0.021561	no
chi-miR-432-5p	17_1790475_1833570	circRNA				-0.725137	0.00761729	0.0227305	no
chi-miR-338-3p	10_91508829_91592619	circRNA	ENSCHIG00000014180	LHFPL2	LHFPL tetraspan subfamily member 2 [Source:NCBI gene;Acc:102189127]	-0.72537	0.00758833	0.0227305	no
chi-miR-27b-3p	13_33179100_33272240	circRNA	ENSCHIG00000016385	ZEB1	zinc finger E-box binding homeobox 1 [Source:NCBI gene;Acc:106502734]	-0.811189	0.00136331	0.00845946	no
chi-miR-665	8_112475884_112495957	circRNA	ENSCHIG00000023106	SH3YL1	SH3 and SYLF domain containing 1 [Source:NCBI gene;Acc:102186310]	-0.911176	3.75e-05	0.00132895	no
chi-miR-3431-3p	4_33600215_33618663	circRNA	ENSCHIG00000009703	AASS	aminoadipate-semialdehyde synthase [Source:NCBI gene;Acc:102185894]	-0.685315	0.013906	0.0344654	no
chi-miR-487b-5p	9_15671584_15680484	circRNA	ENSCHIG00000021420	SMPDL3A	sphingomyelin phosphodiesterase acid like 3A [Source:NCBI gene;Acc:102191799]	-0.701179	0.0110624	0.029884	no
chi-miR-27a-5p	14_12624379_12660440	circRNA				-0.626776	0.0291781	0.0583385	no
chi-miR-380-3p	19_41224623_41317024	circRNA				-0.734316	0.00653792	0.0208088	no
chi-miR-504	17_1790475_1833570	circRNA				-0.752674	0.00472788	0.0174375	no
chi-miR-34a	23_42333788_42406135	circRNA	ENSCHIG00000020109			-0.810992	0.00136996	0.00847686	no
chi-miR-497-5p	LWLT01000021.1_53251116_53322201	circRNA	ENSCHIG00000011491	REPS2	RALBP1 associated Eps domain containing 2 [Source:NCBI gene;Acc:102174285]	-0.907182	4.63e-05	0.001433	no
chi-miR-154b-5p	17_53520080_53522215	circRNA				-0.761853	0.00397973	0.0162346	no
chi-miR-27a-5p	6_2399934_2465968	circRNA				-0.734316	0.00653792	0.0208088	no
chi-miR-206	9_26231856_26242268	circRNA				-0.594406	0.0415215	0.0747889	no
chi-miR-29b-3p	18_21745096_21775026	circRNA	ENSCHIG00000014739	NETO2	neuropilin and tolloid like 2 [Source:NCBI gene;Acc:102182820]	-0.809879	0.00140794	0.00866593	no
chi-miR-497-5p	3_26908088_26924264	circRNA	ENSCHIG00000023944	TUT4	terminal uridylyl transferase 4 [Source:NCBI gene;Acc:102184303]	-0.866219	0.000268443	0.00357864	no
chi-miR-543-5p	13_6662199_6686474	circRNA	ENSCHIG00000011776	ISM1	isthmin 1 [Source:NCBI gene;Acc:102184352]	-0.685315	0.013906	0.0344654	no
chi-miR-3955-3p	13_6662199_6686474	circRNA	ENSCHIG00000011776	ISM1	isthmin 1 [Source:NCBI gene;Acc:102184352]	-0.776224	0.00299286	0.0137075	no
chi-miR-1306-3p	12_74495943_74523691	circRNA	ENSCHIG00000014923	VWA8	von Willebrand factor A domain containing 8 [Source:NCBI gene;Acc:102176618]	-0.622378	0.0306759	0.0602888	no
chi-miR-485-5p	1_19404630_19454650	circRNA				-0.608637	0.0357109	0.0671753	no
chi-miR-200a	14_12624379_12660440	circRNA				-0.718328	0.00850036	0.0246432	no
chi-miR-1197-3p	19_41224623_41243518	circRNA	ENSCHIG00000025510		keratin, type I microfibrillar 48 kDa, component 8C-1 [Source:NCBI gene;Acc:102176726]	-0.752674	0.00472788	0.0174375	no
chi-miR-125a-5p	19_41224623_41317024	circRNA				-0.725137	0.00761729	0.0227305	no
chi-miR-141	7_85052007_85118197	circRNA	ENSCHIG00000013312	FBN2	fibrillin 2 [Source:NCBI gene;Acc:102173553]	-0.944056	3.93e-06	0.000389781	no
chi-miR-380-5p	7_30508968_30606262	circRNA	ENSCHIG00000025474		teneurin-2 [Source:NCBI gene;Acc:108633191]	-0.709143	0.00980999	0.0273418	no
chi-miR-383	19_41224623_41317024	circRNA				-0.734316	0.00653792	0.0208088	no
chi-miR-224-5p	11_30388771_30408264	circRNA				-0.752674	0.00472788	0.0174375	no
chi-miR-338-3p	LWLT01000021.1_53251116_53322201	circRNA	ENSCHIG00000011491	REPS2	RALBP1 associated Eps domain containing 2 [Source:NCBI gene;Acc:102174285]	-0.591945	0.0425902	0.0764528	no
chi-miR-145-5p	9_82862722_82883121	circRNA	ENSCHIG00000023614	FNDC1	fibronectin type III domain containing 1 [Source:NCBI gene;Acc:102170875]	-0.591564	0.0427573	0.0766904	no
chi-miR-502b-3p	19_41224843_41264566	circRNA				-0.761853	0.00397973	0.0162346	no
chi-miR-708-3p	2_29711456_29798577	circRNA				-0.843507	0.000564883	0.00541687	no
chi-miR-143-3p	12_35520126_35552054	circRNA	ENSCHIG00000005312	LMO7	LIM domain 7 [Source:NCBI gene;Acc:102182606]	-0.795396	0.00198009	0.0106691	no
chi-miR-544-5p	7_30567072_30606262	circRNA	ENSCHIG00000025474		teneurin-2 [Source:NCBI gene;Acc:108633191]	-0.901431	6.2e-05	0.00163383	no
chi-miR-767	17_1790475_1833570	circRNA				-0.761853	0.00397973	0.0162346	no
chi-miR-224-5p	19_41243691_41317024	circRNA				-0.725137	0.00761729	0.0227305	no
chi-miR-29a-3p	29_28684057_28729825	circRNA	ENSCHIG00000006678	CDON	cell adhesion associated, oncogene regulated [Source:NCBI gene;Acc:102188923]	-0.825175	0.000951363	0.00690982	no
chi-miR-338-3p	16_62008118_62074761	circRNA				-0.670628	0.0169891	0.039947	no
chi-miR-105b-5p	1_146914668_146941336	circRNA	ENSCHIG00000016792	RUNX1	runt related transcription factor 1 [Source:NCBI gene;Acc:102178020]	-0.748252	0.00512408	0.0182641	no
chi-miR-502b-3p	9_15671584_15680484	circRNA	ENSCHIG00000021420	SMPDL3A	sphingomyelin phosphodiesterase acid like 3A [Source:NCBI gene;Acc:102191799]	-0.722534	0.00794628	0.0236164	no
chi-miR-29c-3p	16_43412593_43466290	circRNA	ENSCHIG00000025014	RERE	arginine-glutamic acid dipeptide repeats [Source:NCBI gene;Acc:102178646]	-0.65149	0.0217247	0.0476499	no
chi-miR-432-3p	19_41243691_41317024	circRNA				-0.734316	0.00653792	0.0208088	no
chi-miR-432-5p	7_30567072_30606262	circRNA	ENSCHIG00000025474		teneurin-2 [Source:NCBI gene;Acc:108633191]	-0.901431	6.2e-05	0.00163383	no
chi-miR-493-3p	5_27299842_27329315	circRNA				-0.734316	0.00653792	0.0208088	no
chi-miR-532-5p	27_18607920_18650811	circRNA				-0.661998	0.0190195	0.0433702	no
chi-miR-129-3p	3_105111861_105202142	circRNA				-0.585976	0.0452632	0.0798633	no
chi-miR-195-5p	2_29711456_29798577	circRNA				-0.802451	0.00168271	0.00966487	no
chi-miR-378-5p	3_85693064_85709217	circRNA				-0.848383	0.000486369	0.00502311	no
chi-miR-381	8_112475884_112495957	circRNA	ENSCHIG00000023106	SH3YL1	SH3 and SYLF domain containing 1 [Source:NCBI gene;Acc:102186310]	-0.832872	0.000770065	0.00623472	no
chi-miR-211	22_44277031_44317361	circRNA	ENSCHIG00000018878,ENSCHIG00000025264	TASOR,CCDC66		-0.587413	0.0446093	0.0788368	no
chi-miR-502b-3p	19_41264441_41317024	circRNA				-0.761853	0.00397973	0.0162346	no
chi-miR-708-3p	3_119473360_119499163	circRNA	ENSCHIG00000024329	DCAF6	DDB1 and CUL4 associated factor 6 [Source:NCBI gene;Acc:102172777]	-0.797625	0.00188209	0.0103462	no
chi-miR-383	19_41243691_41317024	circRNA				-0.734316	0.00653792	0.0208088	no
chi-miR-154b-5p	1_19404630_19454650	circRNA				-0.64423	0.0237505	0.0507254	no
chi-miR-3959-3p	19_41224623_41264269	circRNA				-0.761853	0.00397973	0.0162346	no
chi-miR-141	2_107548050_107575268	circRNA				-0.903679	5.54e-05	0.00158955	no
chi-miR-93-5p	3_63276860_63312137	circRNA	ENSCHIG00000020640	COL24A1	collagen type XXIV alpha 1 chain [Source:NCBI gene;Acc:102185420]	-0.761686	0.00399243	0.0162731	no
chi-miR-29b-5p	7_85052007_85118197	circRNA	ENSCHIG00000013312	FBN2	fibrillin 2 [Source:NCBI gene;Acc:102173553]	-0.629371	0.0283197	0.0569031	no
chi-miR-767	6_102437660_102447350	circRNA	ENSCHIG00000008450	AFF1	AF4/FMR2 family member 1 [Source:NCBI gene;Acc:102185996]	-0.64423	0.0237505	0.0507254	no
chi-miR-338-3p	11_96714402_96756768	circRNA	ENSCHIG00000013327	MVB12B	multivesicular body subunit 12B [Source:NCBI gene;Acc:102187499]	-0.626971	0.0291129	0.0582904	no
chi-miR-193b-3p	23_42354033_42406135	circRNA	ENSCHIG00000020109			-0.826588	0.000915842	0.00690982	no
chi-miR-34a	26_2844102_2853858	circRNA	ENSCHIG00000019232	EBF3	EBF transcription factor 3 [Source:NCBI gene;Acc:102174998]	-0.839161	0.000642826	0.00565106	no
chi-miR-493-3p	19_41224623_41317024	circRNA				-0.734316	0.00653792	0.0208088	no
chi-miR-376b-5p	8_112475884_112495957	circRNA	ENSCHIG00000023106	SH3YL1	SH3 and SYLF domain containing 1 [Source:NCBI gene;Acc:102186310]	-0.832872	0.000770065	0.00623472	no
chi-miR-767	17_1790475_1811077	circRNA				-0.752674	0.00472788	0.0174375	no
chi-miR-433	9_7171167_7174760	circRNA	ENSCHIG00000006319	BCKDHB	branched chain keto acid dehydrogenase E1 subunit beta [Source:NCBI gene;Acc:102171071]	-0.767076	0.00359618	0.0155115	no
chi-let-7b-5p	7_172120_202865	circRNA	ENSCHIG00000011930	CAMK4	calcium/calmodulin dependent protein kinase IV [Source:NCBI gene;Acc:102187484]	-0.788752	0.00229539	0.011665	no
chi-miR-502b-3p	5_27299842_27329315	circRNA				-0.752674	0.00472788	0.0174375	no
chi-miR-378-5p	11_30388771_30408264	circRNA				-0.752674	0.00472788	0.0174375	no
chi-miR-432-3p	11_74750881_74761497	circRNA	ENSCHIG00000008772	UBXN2A	UBX domain protein 2A [Source:NCBI gene;Acc:102172817]	-0.643357	0.0240032	0.0507254	no
chi-miR-338-3p	5_115017045_115041174	circRNA	ENSCHIG00000014589	ATXN10	ataxin 10 [Source:NCBI gene;Acc:102177039]	-0.594406	0.0415215	0.0747889	no
chi-miR-27a-3p	22_58305714_58404500	circRNA				-0.783217	0.00258622	0.0125455	no
chi-miR-105a	11_30388771_30408264	circRNA				-0.734316	0.00653792	0.0208088	no
chi-miR-485-5p	12_40062027_40121789	circRNA	ENSCHIG00000003476	DACH1	dachshund family transcription factor 1 [Source:NCBI gene;Acc:102178371]	-0.750198	0.00494669	0.0181668	no
chi-miR-146b-5p	16_62008118_62074761	circRNA				-0.748608	0.00509129	0.0182641	no
chi-miR-214-3p	17_1790475_1833570	circRNA				-0.761853	0.00397973	0.0162346	no
chi-miR-376c-5p	8_112475884_112495957	circRNA	ENSCHIG00000023106	SH3YL1	SH3 and SYLF domain containing 1 [Source:NCBI gene;Acc:102186310]	-0.832872	0.000770065	0.00623472	no
chi-miR-127-5p	8_112475884_112495957	circRNA	ENSCHIG00000023106	SH3YL1	SH3 and SYLF domain containing 1 [Source:NCBI gene;Acc:102186310]	-0.832872	0.000770065	0.00623472	no
chi-miR-708-5p	19_14385907_14397043	circRNA	ENSCHIG00000019283		adaptor related protein complex 2 subunit beta 1 [Source:NCBI gene;Acc:102172093]	-0.787598	0.00235387	0.0118469	no
chi-miR-93-5p	16_43412593_43466290	circRNA	ENSCHIG00000025014	RERE	arginine-glutamic acid dipeptide repeats [Source:NCBI gene;Acc:102178646]	-0.700526	0.0111699	0.0299838	no
chi-miR-708-3p	5_12285972_12311446	circRNA	ENSCHIG00000021548	TMTC2	transmembrane and tetratricopeptide repeat containing 2 [Source:NCBI gene;Acc:102190760]	-0.811189	0.00136331	0.00845946	no
chi-miR-29a-3p	13_33258516_33272240	circRNA	ENSCHIG00000016385	ZEB1	zinc finger E-box binding homeobox 1 [Source:NCBI gene;Acc:106502734]	-0.818182	0.0011431	0.00771266	no
chi-miR-27b-3p	14_93232044_93282219	circRNA	ENSCHIG00000011011	RIMS1	regulating synaptic membrane exocytosis 1 [Source:NCBI gene;Acc:102184538]	-0.678322	0.0153173	0.0368991	no
chi-miR-127-5p	19_41224623_41317024	circRNA				-0.734316	0.00653792	0.0208088	no
chi-miR-224-5p	1_146914668_146941336	circRNA	ENSCHIG00000016792	RUNX1	runt related transcription factor 1 [Source:NCBI gene;Acc:102178020]	-0.811189	0.00136331	0.00845946	no
chi-miR-146b-5p	7_85052007_85118197	circRNA	ENSCHIG00000013312	FBN2	fibrillin 2 [Source:NCBI gene;Acc:102173553]	-0.769231	0.00344645	0.0150422	no
chi-miR-195-5p	5_7374069_7389105	circRNA	ENSCHIG00000012255	NAV3	neuron navigator 3 [Source:NCBI gene;Acc:102182566]	-0.722534	0.00794628	0.0236164	no
chi-miR-432-5p	5_17701229_17705803	circRNA	ENSCHIG00000010170	CEP290	centrosomal protein 290 [Source:NCBI gene;Acc:102170299]	-0.888972	0.00010998	0.00224534	no
chi-miR-2318	2_107548050_107575268	circRNA				-0.588442	0.0441448	0.0788087	no
chi-miR-412-5p	7_30508968_30606262	circRNA	ENSCHIG00000025474		teneurin-2 [Source:NCBI gene;Acc:108633191]	-0.585976	0.0452632	0.0798633	no
chi-miR-483	13_6662199_6686474	circRNA	ENSCHIG00000011776	ISM1	isthmin 1 [Source:NCBI gene;Acc:102184352]	-0.657343	0.0201855	0.0449851	no
chi-miR-23b-3p	5_30305142_30343396	circRNA				-0.753066	0.00469389	0.0174375	no
chi-miR-432-3p	17_1790475_1833570	circRNA				-0.734316	0.00653792	0.0208088	no
chi-miR-27a-5p	12_35520126_35552054	circRNA	ENSCHIG00000005312	LMO7	LIM domain 7 [Source:NCBI gene;Acc:102182606]	-0.865578	0.000274627	0.00361735	no
chi-miR-758	19_41224623_41317024	circRNA				-0.752674	0.00472788	0.0174375	no
chi-miR-497-5p	16_62008118_62074761	circRNA				-0.873376	0.000206495	0.00311162	no
chi-miR-24-5p	2_29711456_29798577	circRNA				-0.836042	0.000703706	0.00608918	no
chi-miR-335-5p	1_146914668_146941336	circRNA	ENSCHIG00000016792	RUNX1	runt related transcription factor 1 [Source:NCBI gene;Acc:102178020]	-0.874126	0.000200713	0.00307419	no
chi-miR-193b-3p	24_41105431_41135344	circRNA	ENSCHIG00000015240	PTPRM	protein tyrosine phosphatase, receptor type M [Source:NCBI gene;Acc:102173248]	-0.706294	0.0102452	0.0279658	no
chi-miR-376e-5p	9_26231856_26242268	circRNA				-0.895105	8.37e-05	0.00191113	no
chi-miR-708-5p	LWLT01000042.1_310269_326220	circRNA	ENSCHIG00000000152	MAPK1	mitogen-activated protein kinase 1 [Source:NCBI gene;Acc:102186040]	-0.895105	8.37e-05	0.00191113	no
chi-miR-146b-5p	23_42333788_42392758	circRNA	ENSCHIG00000020109			-0.757204	0.00434648	0.0174375	no
chi-miR-195-5p	7_106069342_106082030	circRNA	ENSCHIG00000026141	OBSCN	obscurin, cytoskeletal calmodulin and titin-interacting RhoGEF [Source:NCBI gene;Acc:106502252]	-0.674356	0.0161631	0.0387018	no
chi-miR-329a-3p	3_75922095_75973157	circRNA	ENSCHIG00000017438		sorting nexin 7 [Source:NCBI gene;Acc:102180557]	-0.741259	0.00580115	0.0197721	no
chi-miR-154b-5p	4_41207111_41254724	circRNA	ENSCHIG00000015297	GLI3	GLI family zinc finger 3 [Source:NCBI gene;Acc:102178142]	-0.674356	0.0161631	0.0387018	no
chi-miR-2332	10_91508829_91592619	circRNA	ENSCHIG00000014180	LHFPL2	LHFPL tetraspan subfamily member 2 [Source:NCBI gene;Acc:102189127]	-0.795794	0.00196229	0.0106279	no
chi-miR-105b-5p	11_30388771_30408264	circRNA				-0.752674	0.00472788	0.0174375	no
chi-miR-146b-5p	LWLT01000021.1_51692245_51705256	circRNA				-0.643357	0.0240032	0.0507254	no
chi-miR-494	6_68272249_68299586	circRNA	ENSCHIG00000024006	DCUN1D4	defective in cullin neddylation 1 domain containing 4 [Source:NCBI gene;Acc:102178894]	-0.699301	0.0113742	0.0299838	no
chi-miR-708-3p	19_17783114_17803011	circRNA	ENSCHIG00000021351	CRLF3	cytokine receptor like factor 3 [Source:NCBI gene;Acc:102188795]	-0.651349	0.0217628	0.0476499	no
chi-miR-1306-3p	29_27757487_27772458	circRNA	ENSCHIG00000006217	CCDC15	coiled-coil domain containing 15 [Source:NCBI gene;Acc:102182948]	-0.747449	0.00519858	0.0185164	no
chi-miR-24-3p	22_58305714_58404500	circRNA				-0.804196	0.00161477	0.00939149	no
chi-miR-338-3p	1_70019001_70030025	circRNA	ENSCHIG00000025525	LRCH3	leucine rich repeats and calponin homology domain containing 3 [Source:NCBI gene;Acc:102170820]	-0.732365	0.00675706	0.0213375	no
chi-miR-27b-3p	7_172120_230877	circRNA	ENSCHIG00000011930	CAMK4	calcium/calmodulin dependent protein kinase IV [Source:NCBI gene;Acc:102187484]	-0.615385	0.0331699	0.0636096	no
chi-miR-154b-5p	3_75922095_75973157	circRNA	ENSCHIG00000017438		sorting nexin 7 [Source:NCBI gene;Acc:102180557]	-0.706294	0.0102452	0.0279658	no
chi-miR-708-5p	2_29711456_29798577	circRNA				-0.750198	0.00494669	0.0181668	no
chi-miR-146b-3p	23_42333788_42392758	circRNA	ENSCHIG00000020109			-0.794648	0.00201382	0.0107661	no
chi-miR-193a	23_42354033_42406135	circRNA	ENSCHIG00000020109			-0.826588	0.000915842	0.00690982	no
chi-miR-758	3_85681727_85709217	circRNA				-0.72034	0.00823184	0.0240034	no
chi-miR-362-5p	9_26231856_26242268	circRNA				-0.888112	0.000114134	0.00224534	no
chi-miR-532-3p	LWLT01000264.1_21229_27916	circRNA				-0.727273	0.00735503	0.0224232	no
chi-miR-128-3p	12_40062027_40121789	circRNA	ENSCHIG00000003476	DACH1	dachshund family transcription factor 1 [Source:NCBI gene;Acc:102178371]	-0.780057	0.00276436	0.0132032	no
chi-miR-143-3p	5_12285972_12338205	circRNA	ENSCHIG00000021548	TMTC2	transmembrane and tetratricopeptide repeat containing 2 [Source:NCBI gene;Acc:102190760]	-0.664336	0.0184527	0.0422524	no
chi-miR-494	29_27757487_27772458	circRNA	ENSCHIG00000006217	CCDC15	coiled-coil domain containing 15 [Source:NCBI gene;Acc:102182948]	-0.676264	0.0157521	0.0378821	no
chi-miR-1197-3p	7_14454570_14464761	circRNA	ENSCHIG00000027166	CAST	calpastatin [Source:NCBI gene;Acc:100861304]	-0.859176	0.000342671	0.0040416	no
chi-miR-221-5p	21_65000513_65014965	circRNA				-0.66283	0.0188163	0.0430403	no
chi-miR-497-5p	LWLT01000021.1_51692245_51705256	circRNA				-0.867133	0.000259812	0.00349172	no
chi-miR-429	19_17783114_17803011	circRNA	ENSCHIG00000021351	CRLF3	cytokine receptor like factor 3 [Source:NCBI gene;Acc:102188795]	-0.654908	0.0208158	0.0460228	no
chi-miR-145-3p	18_41985462_41995049	circRNA				-0.637479	0.0257544	0.0536812	no
chi-miR-487b-3p	17_1790475_1833570	circRNA				-0.752674	0.00472788	0.0174375	no
22_33210	14_12624379_12660440	circRNA				-0.748749	0.0050783	0.0182641	no
23_34072	21_23975771_23990240	circRNA	ENSCHIG00000016013	SH3GL3	SH3 domain containing GRB2 like 3, endophilin A3 [Source:NCBI gene;Acc:102168209]	-0.75354	0.00465308	0.0174375	no
14_23147	29_28684057_28729825	circRNA	ENSCHIG00000006678	CDON	cell adhesion associated, oncogene regulated [Source:NCBI gene;Acc:102188923]	-0.678322	0.0153173	0.0368991	no
LWLT01000021.1_40726	22_58305714_58404500	circRNA				-0.657343	0.0201855	0.0449851	no
19_30034	1_20724717_20751874	circRNA				-0.718328	0.00850036	0.0246432	no
23_34072	24_23828087_23885973	circRNA	ENSCHIG00000000206	ASXL3	ASXL transcriptional regulator 3 [Source:NCBI gene;Acc:102185524]	-0.6381	0.0255651	0.0534514	no
11_19942	12_40186002_40205920	circRNA	ENSCHIG00000003476	DACH1	dachshund family transcription factor 1 [Source:NCBI gene;Acc:102178371]	-0.748749	0.0050783	0.0182641	no
26_37409	8_94379232_94407339	circRNA				-0.734316	0.00653792	0.0208088	no
LWLT01000021.1_40726	4_52659959_52663548	circRNA	ENSCHIG00000017696	CREB5	cAMP responsive element binding protein 5 [Source:NCBI gene;Acc:102190378]	-0.727273	0.00735503	0.0224232	no
19_30416	22_58305714_58404500	circRNA				-0.755245	0.00450843	0.0174375	no
4_7489	13_33179100_33272240	circRNA	ENSCHIG00000016385	ZEB1	zinc finger E-box binding homeobox 1 [Source:NCBI gene;Acc:106502734]	-0.608392	0.035806	0.0671753	no
22_33210	10_90131230_90146154	circRNA	ENSCHIG00000024576	SERINC5	serine incorporator 5 [Source:NCBI gene;Acc:102190521]	-0.748749	0.0050783	0.0182641	no
19_30034	8_27506440_27547321	circRNA	ENSCHIG00000026061	BNC2	basonuclin 2 [Source:NCBI gene;Acc:102186591]	-0.839161	0.000642826	0.00565106	no
1_2195	14_33358612_33374397	circRNA	ENSCHIG00000015490	TRPS1	transcriptional repressor GATA binding 1 [Source:NCBI gene;Acc:102184827]	-0.727273	0.00735503	0.0224232	no
16_25995	5_27272649_27273169	circRNA	ENSCHIG00000026301		keratin, type II cuticular Hb5 [Source:NCBI gene;Acc:102184693]	-0.832092	0.000787114	0.00623472	no
2_2962	8_768135_771034	circRNA	ENSCHIG00000026232	PALLD	palladin, cytoskeletal associated protein [Source:NCBI gene;Acc:102191795]	-0.6972	0.0117306	0.030817	no
22_33210	3_26908088_26924264	circRNA	ENSCHIG00000023944	TUT4	terminal uridylyl transferase 4 [Source:NCBI gene;Acc:102184303]	-0.748749	0.0050783	0.0182641	no
4_7489	5_102268251_102304409	circRNA	ENSCHIG00000023479	C1R	complement C1r [Source:NCBI gene;Acc:102188835]	-0.727273	0.00735503	0.0224232	no
1_2195	16_25215175_25219782	circRNA	ENSCHIG00000013995	SUSD4	sushi domain containing 4 [Source:NCBI gene;Acc:102183440]	-0.717863	0.00856333	0.0247067	no
22_33210	LWLT01000021.1_51692245_51705256	circRNA				-0.715958	0.00882492	0.0253913	no
1_2195	16_62008118_62074761	circRNA				-0.810992	0.00136996	0.00847686	no
16_25995	3_71250442_71278523	circRNA	ENSCHIG00000011428	ARHGAP29	Rho GTPase activating protein 29 [Source:NCBI gene;Acc:102185622]	-0.699301	0.0113742	0.0299838	no
20_31366	7_106069342_106082030	circRNA	ENSCHIG00000026141	OBSCN	obscurin, cytoskeletal calmodulin and titin-interacting RhoGEF [Source:NCBI gene;Acc:106502252]	-0.594593	0.0414408	0.0747889	no
16_26351	4_41207111_41254724	circRNA	ENSCHIG00000015297	GLI3	GLI family zinc finger 3 [Source:NCBI gene;Acc:102178142]	-0.584385	0.0459951	0.0809399	no
19_29204	18_54627313_54628617	circRNA	ENSCHIG00000018939	HIF3A	hypoxia inducible factor 3 subunit alpha [Source:NCBI gene;Acc:102168854]	-0.589074	0.0438617	0.0783949	no
14_23147	1_7833330_7845998	circRNA	ENSCHIG00000018986	ADAMTS5	ADAM metallopeptidase with thrombospondin type 1 motif 5 [Source:NCBI gene;Acc:102172097]	-0.937063	6.99e-06	0.000521858	no
4_7489	8_5654592_5666013	circRNA	ENSCHIG00000010238	GALNT7	polypeptide N-acetylgalactosaminyltransferase 7 [Source:NCBI gene;Acc:102185180]	-0.685315	0.013906	0.0344654	no
20_31366	10_91508829_91592619	circRNA	ENSCHIG00000014180	LHFPL2	LHFPL tetraspan subfamily member 2 [Source:NCBI gene;Acc:102189127]	-0.690158	0.0129864	0.0330361	no
22_33210	14_17352154_17397222	circRNA	ENSCHIG00000016789			-0.752674	0.00472788	0.0174375	no
21_32357	7_14454570_14464761	circRNA	ENSCHIG00000027166	CAST	calpastatin [Source:NCBI gene;Acc:100861304]	-0.823964	0.000982639	0.00710579	no
19_29204	6_2399934_2465968	circRNA				-0.610092	0.0351517	0.0670151	no
19_29953	7_85052007_85118197	circRNA	ENSCHIG00000013312	FBN2	fibrillin 2 [Source:NCBI gene;Acc:102173553]	-0.923077	1.86e-05	0.000857647	no
2_2962	3_119473360_119499163	circRNA	ENSCHIG00000024329	DCAF6	DDB1 and CUL4 associated factor 6 [Source:NCBI gene;Acc:102172777]	-0.732365	0.00675706	0.0213375	no
19_29204	13_33179100_33272240	circRNA	ENSCHIG00000016385	ZEB1	zinc finger E-box binding homeobox 1 [Source:NCBI gene;Acc:106502734]	-0.838049	0.000664043	0.00579651	no
20_31366	7_172120_230877	circRNA	ENSCHIG00000011930	CAMK4	calcium/calmodulin dependent protein kinase IV [Source:NCBI gene;Acc:102187484]	-0.643357	0.0240032	0.0507254	no
14_23147	5_33471247_33488926	circRNA				-0.588442	0.0441448	0.0788087	no
20_31366	21_824449_835286	circRNA				-0.577479	0.0492696	0.0849181	no
28_39154	5_20846275_20862392	circRNA	ENSCHIG00000018030	DCN	decorin [Source:NCBI gene;Acc:100860944]	-0.727273	0.00735503	0.0224232	no
20_31366	LWLT01000021.1_53251116_53322201	circRNA	ENSCHIG00000011491	REPS2	RALBP1 associated Eps domain containing 2 [Source:NCBI gene;Acc:102174285]	-0.690019	0.0130122	0.0330509	no
21_32908	24_41105431_41135344	circRNA	ENSCHIG00000015240	PTPRM	protein tyrosine phosphatase, receptor type M [Source:NCBI gene;Acc:102173248]	-0.846154	0.000521134	0.00507581	no
26_37409	14_24243368_24258519	circRNA	ENSCHIG00000020362	OXR1	oxidation resistance 1 [Source:NCBI gene;Acc:102190975]	-0.58042	0.047856	0.0829136	no
19_29065	1_45036289_45039468	circRNA	ENSCHIG00000026704	ABI3BP	ABI family member 3 binding protein [Source:NCBI gene;Acc:102182911]	-0.669031	0.0173522	0.0406091	no
19_29953	16_63542706_63560758	circRNA	ENSCHIG00000017821	RGL1	ral guanine nucleotide dissociation stimulator like 1 [Source:NCBI gene;Acc:102173025]	-0.587413	0.0446093	0.0788368	no
4_7489	7_86075420_86092932	circRNA	ENSCHIG00000018817	ADAMTS19	ADAM metallopeptidase with thrombospondin type 1 motif 19 [Source:NCBI gene;Acc:102170967]	-0.626776	0.0291781	0.0583385	no
20_31366	7_106070143_106081450	circRNA	ENSCHIG00000026141	OBSCN	obscurin, cytoskeletal calmodulin and titin-interacting RhoGEF [Source:NCBI gene;Acc:106502252]	-0.761853	0.00397973	0.0162346	no
4_7489	5_7389082_7415006	circRNA	ENSCHIG00000012255	NAV3	neuron navigator 3 [Source:NCBI gene;Acc:102182566]	-0.683382	0.014286	0.0353631	no
20_31366	5_12285972_12311446	circRNA	ENSCHIG00000021548	TMTC2	transmembrane and tetratricopeptide repeat containing 2 [Source:NCBI gene;Acc:102190760]	-0.643357	0.0240032	0.0507254	no
19_29204	29_28684057_28729825	circRNA	ENSCHIG00000006678	CDON	cell adhesion associated, oncogene regulated [Source:NCBI gene;Acc:102188923]	-0.718328	0.00850036	0.0246432	no
16_25995	7_30508968_30606262	circRNA	ENSCHIG00000025474		teneurin-2 [Source:NCBI gene;Acc:108633191]	-0.839774	0.000631345	0.00565106	no
26_37440	1_44775766_44792088	circRNA	ENSCHIG00000022648		transmembrane protein 45A [Source:NCBI gene;Acc:102180889]	-0.813151	0.00129851	0.00845946	no
22_33210	14_17325515_17397222	circRNA	ENSCHIG00000016789			-0.734316	0.00653792	0.0208088	no
19_30750	3_40056419_40078403	circRNA	ENSCHIG00000012365	CACHD1	cache domain containing 1 [Source:NCBI gene;Acc:102183121]	-0.622874	0.030504	0.0602888	no
19_30034	29_27757487_27772458	circRNA	ENSCHIG00000006217	CCDC15	coiled-coil domain containing 15 [Source:NCBI gene;Acc:102182948]	-0.772364	0.00323718	0.0146474	no
LWLT01000021.1_40726	LWLT01000021.1_53251116_53322201	circRNA	ENSCHIG00000011491	REPS2	RALBP1 associated Eps domain containing 2 [Source:NCBI gene;Acc:102174285]	-0.58494	0.0457391	0.0805966	no
4_7489	5_20846275_20862392	circRNA	ENSCHIG00000018030	DCN	decorin [Source:NCBI gene;Acc:100860944]	-0.608392	0.035806	0.0671753	no
2_2962	7_106071302_106083419	circRNA	ENSCHIG00000026141	OBSCN	obscurin, cytoskeletal calmodulin and titin-interacting RhoGEF [Source:NCBI gene;Acc:106502252]	-0.740562	0.00587214	0.0199524	no
16_26351	28_39102885_39111412	circRNA	ENSCHIG00000015700	MAP3K21	mitogen-activated protein kinase kinase kinase 21 [Source:NCBI gene;Acc:102191110]	-0.705411	0.010383	0.0283146	no
1_2195	24_23828087_23885973	circRNA	ENSCHIG00000000206	ASXL3	ASXL transcriptional regulator 3 [Source:NCBI gene;Acc:102185524]	-0.797625	0.00188209	0.0103462	no
20_31366	7_106074945_106082030	circRNA	ENSCHIG00000026141	OBSCN	obscurin, cytoskeletal calmodulin and titin-interacting RhoGEF [Source:NCBI gene;Acc:106502252]	-0.748608	0.00509129	0.0182641	no
1_2195	7_95966409_95973779	circRNA	ENSCHIG00000014171	INSR	insulin receptor [Source:NCBI gene;Acc:102168996]	-0.703118	0.0107471	0.0291315	no
22_33210	12_60568820_60613884	circRNA	ENSCHIG00000024367	NBEA	neurobeachin [Source:NCBI gene;Acc:102186605]	-0.67275	0.0165151	0.039497	no
28_39194	24_41105431_41135344	circRNA	ENSCHIG00000015240	PTPRM	protein tyrosine phosphatase, receptor type M [Source:NCBI gene;Acc:102173248]	-0.616347	0.0328184	0.0636096	no
26_37440	27_26263263_26281959	circRNA	ENSCHIG00000018661	PCM1	pericentriolar material 1 [Source:NCBI gene;Acc:102191676]	-0.802969	0.00166233	0.00960534	no
LWLT01000021.1_40726	5_64143969_64145981	circRNA	ENSCHIG00000026869	MYBPC1	myosin binding protein C, slow type [Source:NCBI gene;Acc:102172972]	-0.733012	0.00668381	0.0211851	no
20_31366	19_18405450_18435938	circRNA	ENSCHIG00000010629	NF1	neurofibromin 1 [Source:NCBI gene;Acc:102183001]	-0.608244	0.0358633	0.0672289	no
20_31366	23_42354033_42406135	circRNA	ENSCHIG00000020109			-0.756406	0.00441191	0.0174375	no
22_33210	3_40056419_40078403	circRNA	ENSCHIG00000012365	CACHD1	cache domain containing 1 [Source:NCBI gene;Acc:102183121]	-0.67275	0.0165151	0.039497	no
22_33210	7_86121160_86143481	circRNA	ENSCHIG00000018817	ADAMTS19	ADAM metallopeptidase with thrombospondin type 1 motif 19 [Source:NCBI gene;Acc:102170967]	-0.748749	0.0050783	0.0182641	no
21_32357	1_146914668_146941336	circRNA	ENSCHIG00000016792	RUNX1	runt related transcription factor 1 [Source:NCBI gene;Acc:102178020]	-0.832168	0.000785442	0.00623472	no
20_31366	16_62008118_62074761	circRNA				-0.686224	0.0137298	0.0344654	no
20_31366	7_106074945_106081450	circRNA	ENSCHIG00000026141	OBSCN	obscurin, cytoskeletal calmodulin and titin-interacting RhoGEF [Source:NCBI gene;Acc:106502252]	-0.719759	0.00830862	0.0241721	no
2_4026	1_50200527_50212707	circRNA	ENSCHIG00000024426	CBLB	Cbl proto-oncogene B [Source:NCBI gene;Acc:102186998]	-0.798719	0.00183541	0.0103462	no
26_37409	28_7042267_7045526	circRNA				-0.752674	0.00472788	0.0174375	no
23_35264	22_44277031_44317361	circRNA	ENSCHIG00000018878,ENSCHIG00000025264	TASOR,CCDC66		-0.678322	0.0153173	0.0368991	no
LWLT01000027.1_41541	8_112475884_112495957	circRNA	ENSCHIG00000023106	SH3YL1	SH3 and SYLF domain containing 1 [Source:NCBI gene;Acc:102186310]	-0.875583	0.000189842	0.00307419	no
20_31366	5_30305142_30343396	circRNA				-0.693521	0.0123749	0.0322295	no
19_29204	13_57238800_57259672	circRNA	ENSCHIG00000023510	VAPB	VAMP associated protein B and C [Source:NCBI gene;Acc:102176246]	-0.845091	0.000538366	0.00521186	no
26_37440	10_91508829_91592619	circRNA	ENSCHIG00000014180	LHFPL2	LHFPL tetraspan subfamily member 2 [Source:NCBI gene;Acc:102189127]	-0.754175	0.00459877	0.0174375	no
8_15561	10_91508829_91592619	circRNA	ENSCHIG00000014180	LHFPL2	LHFPL tetraspan subfamily member 2 [Source:NCBI gene;Acc:102189127]	-0.711285	0.00949192	0.0265672	no
LWLT01000021.1_40726	14_12418438_12425224	circRNA	ENSCHIG00000015977	VIRMA	vir like m6A methyltransferase associated [Source:NCBI gene;Acc:102186498]	-0.58042	0.047856	0.0829136	no
19_29204	12_35520126_35550205	circRNA	ENSCHIG00000005312	LMO7	LIM domain 7 [Source:NCBI gene;Acc:102182606]	-0.578201	0.0489199	0.0845502	no
4_7489	8_59812602_59816811	circRNA	ENSCHIG00000013918	TMEM8B	transmembrane protein 8B [Source:NCBI gene;Acc:102182129]	-0.671329	0.0168315	0.0396093	no
19_30416	2_29711456_29798577	circRNA				-0.750198	0.00494669	0.0181668	no
22_33210	13_33179100_33272240	circRNA	ENSCHIG00000016385	ZEB1	zinc finger E-box binding homeobox 1 [Source:NCBI gene;Acc:106502734]	-0.761853	0.00397973	0.0162346	no
19_29953	19_14385907_14397043	circRNA	ENSCHIG00000019283		adaptor related protein complex 2 subunit beta 1 [Source:NCBI gene;Acc:102172093]	-0.748608	0.00509129	0.0182641	no
1_2195	22_58305714_58404500	circRNA				-0.832168	0.000785442	0.00623472	no
LWLT01000021.1_40726	28_21013224_21021880	circRNA	ENSCHIG00000015250	MYPN	myopalladin [Source:NCBI gene;Acc:102182760]	-0.744722	0.00545789	0.0192603	no
19_29953	12_35520126_35550205	circRNA	ENSCHIG00000005312	LMO7	LIM domain 7 [Source:NCBI gene;Acc:102182606]	-0.740562	0.00587214	0.0199524	no
21_32357	8_94379232_94407339	circRNA				-0.734316	0.00653792	0.0208088	no
20_31366	2_29711456_29798577	circRNA				-0.675552	0.0159045	0.0381148	no
2_2962	7_106073544_106081450	circRNA	ENSCHIG00000026141	OBSCN	obscurin, cytoskeletal calmodulin and titin-interacting RhoGEF [Source:NCBI gene;Acc:106502252]	-0.660884	0.0192937	0.0439046	no
16_25995	7_30567072_30606262	circRNA	ENSCHIG00000025474		teneurin-2 [Source:NCBI gene;Acc:108633191]	-0.612691	0.0341681	0.0652528	no
20_31366	2_107548050_107575268	circRNA				-0.809108	0.00143474	0.00879	no
LWLT01000021.1_40726	16_25215175_25219782	circRNA	ENSCHIG00000013995	SUSD4	sushi domain containing 4 [Source:NCBI gene;Acc:102183440]	-0.797625	0.00188209	0.0103462	no
1_2195	13_57238800_57259672	circRNA	ENSCHIG00000023510	VAPB	VAMP associated protein B and C [Source:NCBI gene;Acc:102176246]	-0.72028	0.00823977	0.0240034	no
21_32431	2_44207256_44212985	circRNA	ENSCHIG00000025930	RAPH1	Ras association (RalGDS/AF-6) and pleckstrin homology domains 1 [Source:NCBI gene;Acc:102173512]	-0.804196	0.00161477	0.00939149	no
19_29953	1_151487374_151491495	circRNA	ENSCHIG00000018630	COL6A6	collagen type VI alpha 6 chain [Source:NCBI gene;Acc:102178401]	-0.604638	0.0372812	0.0695192	no
14_23491	24_42582919_42590325	circRNA	ENSCHIG00000010227		piezo type mechanosensitive ion channel component 2 [Source:NCBI gene;Acc:102178229]	-0.797203	0.00190037	0.0103462	no
23_34293	2_107548050_107575268	circRNA				-0.612961	0.0340673	0.0651041	no
20_31366	27_26263263_26281959	circRNA	ENSCHIG00000018661	PCM1	pericentriolar material 1 [Source:NCBI gene;Acc:102191676]	-0.608392	0.035806	0.0671753	no
14_23147	13_33179100_33272240	circRNA	ENSCHIG00000016385	ZEB1	zinc finger E-box binding homeobox 1 [Source:NCBI gene;Acc:106502734]	-0.629371	0.0283197	0.0569031	no
1_2195	28_2965973_2976036	circRNA	ENSCHIG00000025521	MAPK8	mitogen-activated protein kinase 8 [Source:NCBI gene;Acc:100861087]	-0.622378	0.0306759	0.0602888	no
20_31366	3_40056419_40078403	circRNA	ENSCHIG00000012365	CACHD1	cache domain containing 1 [Source:NCBI gene;Acc:102183121]	-0.868465	0.000247625	0.00349172	no
22_33210	24_23828087_23885973	circRNA	ENSCHIG00000000206	ASXL3	ASXL transcriptional regulator 3 [Source:NCBI gene;Acc:102185524]	-0.599619	0.0393202	0.0720956	no
14_23147	7_84193926_84212544	circRNA	ENSCHIG00000026659	PRRC1	proline rich coiled-coil 1 [Source:NCBI gene;Acc:102185173]	-0.72028	0.00823977	0.0240034	no
LWLT01000027.1_41541	22_44277031_44317361	circRNA	ENSCHIG00000018878,ENSCHIG00000025264	TASOR,CCDC66		-0.734266	0.00654349	0.0208088	no
21_32431	1_70019001_70030025	circRNA	ENSCHIG00000025525	LRCH3	leucine rich repeats and calponin homology domain containing 3 [Source:NCBI gene;Acc:102170820]	-0.725114	0.00762017	0.0227305	no
19_29204	5_115017045_115041174	circRNA	ENSCHIG00000014589	ATXN10	ataxin 10 [Source:NCBI gene;Acc:102177039]	-0.746497	0.00528802	0.0187575	no
19_29953	21_65118441_65144687	circRNA	ENSCHIG00000010656	RTL1	retrotransposon Gag like 1 [Source:NCBI gene;Acc:102180435]	-0.70182	0.0109574	0.0296367	no
20_31366	5_115017045_115041174	circRNA	ENSCHIG00000014589	ATXN10	ataxin 10 [Source:NCBI gene;Acc:102177039]	-0.629371	0.0283197	0.0569031	no
14_23147	21_23975771_23990240	circRNA	ENSCHIG00000016013	SH3GL3	SH3 domain containing GRB2 like 3, endophilin A3 [Source:NCBI gene;Acc:102168209]	-0.809879	0.00140794	0.00866593	no
19_30750	24_40253104_40263109	circRNA	ENSCHIG00000022452	ARHGAP28	Rho GTPase activating protein 28 [Source:NCBI gene;Acc:102172677]	-0.72028	0.00823977	0.0240034	no
19_29953	3_26908088_26924264	circRNA	ENSCHIG00000023944	TUT4	terminal uridylyl transferase 4 [Source:NCBI gene;Acc:102184303]	-0.760582	0.00407753	0.0165486	no
20_31366	24_41071359_41083479	circRNA	ENSCHIG00000015240	PTPRM	protein tyrosine phosphatase, receptor type M [Source:NCBI gene;Acc:102173248]	-0.692308	0.012593	0.0322295	no
20_31366	5_61526783_61541794	circRNA	ENSCHIG00000026050	APAF1	apoptotic peptidase activating factor 1 [Source:NCBI gene;Acc:102188830]	-0.72028	0.00823977	0.0240034	no
1_2195	5_64077705_64078871	circRNA	ENSCHIG00000026869	MYBPC1	myosin binding protein C, slow type [Source:NCBI gene;Acc:102172972]	-0.707278	0.0100932	0.0279658	no
28_39194	14_12418438_12425224	circRNA	ENSCHIG00000015977	VIRMA	vir like m6A methyltransferase associated [Source:NCBI gene;Acc:102186498]	-0.812127	0.00133201	0.00845946	no
20_31366	7_172120_202865	circRNA	ENSCHIG00000011930	CAMK4	calcium/calmodulin dependent protein kinase IV [Source:NCBI gene;Acc:102187484]	-0.739455	0.00598623	0.0202327	no
19_29953	5_12285972_12311446	circRNA	ENSCHIG00000021548	TMTC2	transmembrane and tetratricopeptide repeat containing 2 [Source:NCBI gene;Acc:102190760]	-0.678322	0.0153173	0.0368991	no
20_31366	13_57238800_57259672	circRNA	ENSCHIG00000023510	VAPB	VAMP associated protein B and C [Source:NCBI gene;Acc:102176246]	-0.769231	0.00344645	0.0150422	no
4_7489	14_17352154_17397222	circRNA	ENSCHIG00000016789			-0.594406	0.0415215	0.0747889	no
14_23147	23_42333788_42392758	circRNA	ENSCHIG00000020109			-0.786327	0.00241956	0.0121406	no
21_32431	10_91508829_91592619	circRNA	ENSCHIG00000014180	LHFPL2	LHFPL tetraspan subfamily member 2 [Source:NCBI gene;Acc:102189127]	-0.746497	0.00528802	0.0187575	no
20_31366	7_106071302_106083419	circRNA	ENSCHIG00000026141	OBSCN	obscurin, cytoskeletal calmodulin and titin-interacting RhoGEF [Source:NCBI gene;Acc:106502252]	-0.757204	0.00434648	0.0174375	no
21_32431	5_12285972_12311446	circRNA	ENSCHIG00000021548	TMTC2	transmembrane and tetratricopeptide repeat containing 2 [Source:NCBI gene;Acc:102190760]	-0.72028	0.00823977	0.0240034	no
23_35264	8_55432434_55460431	circRNA	ENSCHIG00000019651	TLE4	TLE family member 4, transcriptional corepressor [Source:NCBI gene;Acc:102171243]	-0.715958	0.00882492	0.0253913	no
28_39154	14_12418438_12425224	circRNA	ENSCHIG00000015977	VIRMA	vir like m6A methyltransferase associated [Source:NCBI gene;Acc:102186498]	-0.587413	0.0446093	0.0788368	no
2_2962	15_36663076_36664691	circRNA	ENSCHIG00000013767	ZNF215	zinc finger protein 215 [Source:NCBI gene;Acc:102188878]	-0.697946	0.0116032	0.0305509	no
21_32431	LWLT01000021.1_53251116_53322201	circRNA	ENSCHIG00000011491	REPS2	RALBP1 associated Eps domain containing 2 [Source:NCBI gene;Acc:102174285]	-0.823119	0.00100495	0.00722237	no
1_2208	3_40056419_40078403	circRNA	ENSCHIG00000012365	CACHD1	cache domain containing 1 [Source:NCBI gene;Acc:102183121]	-0.576604	0.049696	0.0855491	no
28_39194	18_21745096_21775026	circRNA	ENSCHIG00000014739	NETO2	neuropilin and tolloid like 2 [Source:NCBI gene;Acc:102182820]	-0.6134	0.0339033	0.0649094	no
20_31366	12_35520126_35550205	circRNA	ENSCHIG00000005312	LMO7	LIM domain 7 [Source:NCBI gene;Acc:102182606]	-0.694797	0.0121486	0.031768	no
28_39154	5_64143969_64145981	circRNA	ENSCHIG00000026869	MYBPC1	myosin binding protein C, slow type [Source:NCBI gene;Acc:102172972]	-0.66283	0.0188163	0.0430403	no
20_31366	12_35520126_35552054	circRNA	ENSCHIG00000005312	LMO7	LIM domain 7 [Source:NCBI gene;Acc:102182606]	-0.725214	0.00760775	0.0227305	no
14_23147	22_58305714_58404500	circRNA				-0.615385	0.0331699	0.0636096	no
19_29204	22_58305714_58404500	circRNA				-0.774667	0.00308965	0.0140567	no
2_2962	6_67622313_67629625	circRNA	ENSCHIG00000013405	SLAIN2	SLAIN motif family member 2 [Source:NCBI gene;Acc:102189565]	-0.755245	0.00450843	0.0174375	no
23_35264	12_40186002_40205920	circRNA	ENSCHIG00000003476	DACH1	dachshund family transcription factor 1 [Source:NCBI gene;Acc:102178371]	-0.598606	0.0397413	0.0726729	no
22_33210	5_7374069_7389105	circRNA	ENSCHIG00000012255	NAV3	neuron navigator 3 [Source:NCBI gene;Acc:102182566]	-0.67275	0.0165151	0.039497	no
20_31366	16_63542706_63560758	circRNA	ENSCHIG00000017821	RGL1	ral guanine nucleotide dissociation stimulator like 1 [Source:NCBI gene;Acc:102173025]	-0.699301	0.0113742	0.0299838	no
19_29953	27_26263263_26281959	circRNA	ENSCHIG00000018661	PCM1	pericentriolar material 1 [Source:NCBI gene;Acc:102191676]	-0.636364	0.0260969	0.0536812	no
20_31366	29_28684057_28729825	circRNA	ENSCHIG00000006678	CDON	cell adhesion associated, oncogene regulated [Source:NCBI gene;Acc:102188923]	-0.615385	0.0331699	0.0636096	no
20_31366	5_33471247_33488926	circRNA				-0.767076	0.00359618	0.0155115	no
19_29065	3_68914551_68923392	circRNA	ENSCHIG00000015521	TGFBR3	transforming growth factor beta receptor 3 [Source:NCBI gene;Acc:102169722]	-0.58042	0.047856	0.0829136	no
19_29065	5_102268251_102304409	circRNA	ENSCHIG00000023479	C1R	complement C1r [Source:NCBI gene;Acc:102188835]	-0.664336	0.0184527	0.0422524	no
21_32431	19_14385907_14397043	circRNA	ENSCHIG00000019283		adaptor related protein complex 2 subunit beta 1 [Source:NCBI gene;Acc:102172093]	-0.694022	0.0122857	0.0320631	no
22_33210	7_85052007_85118197	circRNA	ENSCHIG00000013312	FBN2	fibrillin 2 [Source:NCBI gene;Acc:102173553]	-0.761853	0.00397973	0.0162346	no
20_31366	LWLT01000021.1_51692245_51705256	circRNA				-0.867133	0.000259812	0.00349172	no
4_7489	7_172120_230877	circRNA	ENSCHIG00000011930	CAMK4	calcium/calmodulin dependent protein kinase IV [Source:NCBI gene;Acc:102187484]	-0.643357	0.0240032	0.0507254	no
20_31366	3_63276860_63312137	circRNA	ENSCHIG00000020640	COL24A1	collagen type XXIV alpha 1 chain [Source:NCBI gene;Acc:102185420]	-0.896939	7.68e-05	0.00191113	no
20_31366	7_85052007_85118197	circRNA	ENSCHIG00000013312	FBN2	fibrillin 2 [Source:NCBI gene;Acc:102173553]	-0.846154	0.000521134	0.00507581	no
22_33210	2_51163786_51203156	circRNA	ENSCHIG00000012868	HECW2	HECT, C2 and WW domain containing E3 ubiquitin protein ligase 2 [Source:NCBI gene;Acc:102169918]	-0.752674	0.00472788	0.0174375	no
28_39193	14_12418438_12425224	circRNA	ENSCHIG00000015977	VIRMA	vir like m6A methyltransferase associated [Source:NCBI gene;Acc:102186498]	-0.812127	0.00133201	0.00845946	no
19_29953	12_35520126_35552054	circRNA	ENSCHIG00000005312	LMO7	LIM domain 7 [Source:NCBI gene;Acc:102182606]	-0.787598	0.00235387	0.0118469	no
20_31366	22_58305714_58404500	circRNA				-0.783217	0.00258622	0.0125455	no
1_2195	1_45523147_45539217	circRNA	ENSCHIG00000010277	IMPG2	interphotoreceptor matrix proteoglycan 2 [Source:NCBI gene;Acc:102183182]	-0.866219	0.000268443	0.00357864	no
19_29204	5_30305142_30343396	circRNA				-0.62082	0.0312193	0.061284	no
2_2962	7_106069342_106082030	circRNA	ENSCHIG00000026141	OBSCN	obscurin, cytoskeletal calmodulin and titin-interacting RhoGEF [Source:NCBI gene;Acc:106502252]	-0.681607	0.0146417	0.0360281	no
LWLT01000021.1_40726	11_37613503_37618604	circRNA				-0.727273	0.00735503	0.0224232	no
LWLT01000027.1_41541	5_43950436_43963546	circRNA	ENSCHIG00000010792	CPSF6	cleavage and polyadenylation specific factor 6 [Source:NCBI gene;Acc:102186747]	-0.902098	6e-05	0.00158955	no
26_37440	16_43412593_43466290	circRNA	ENSCHIG00000025014	RERE	arginine-glutamic acid dipeptide repeats [Source:NCBI gene;Acc:102178646]	-0.762699	0.00391561	0.0162346	no
28_39194	7_85052007_85118197	circRNA	ENSCHIG00000013312	FBN2	fibrillin 2 [Source:NCBI gene;Acc:102173553]	-0.609096	0.0355341	0.0671753	no
19_29204	3_15759071_15766136	circRNA	ENSCHIG00000024918	SCMH1	Scm polycomb group protein homolog 1 [Source:NCBI gene;Acc:102181748]	-0.802837	0.00166751	0.00960534	no
19_29953	22_58305714_58404500	circRNA				-0.671329	0.0168315	0.0396093	no
20_31366	11_96714402_96756768	circRNA	ENSCHIG00000013327	MVB12B	multivesicular body subunit 12B [Source:NCBI gene;Acc:102187499]	-0.833626	0.000753851	0.00623472	no
20_31366	18_21745096_21775026	circRNA	ENSCHIG00000014739	NETO2	neuropilin and tolloid like 2 [Source:NCBI gene;Acc:102182820]	-0.915516	2.94e-05	0.00112566	no
22_33210	LWLT01000021.1_53251116_53322201	circRNA	ENSCHIG00000011491	REPS2	RALBP1 associated Eps domain containing 2 [Source:NCBI gene;Acc:102174285]	-0.66664	0.0179063	0.0417478	no
2_2962	LWLT01000042.1_310269_326220	circRNA	ENSCHIG00000000152	MAPK1	mitogen-activated protein kinase 1 [Source:NCBI gene;Acc:102186040]	-0.692308	0.012593	0.0322295	no
28_39193	24_41105431_41135344	circRNA	ENSCHIG00000015240	PTPRM	protein tyrosine phosphatase, receptor type M [Source:NCBI gene;Acc:102173248]	-0.616347	0.0328184	0.0636096	no
16_26351	3_71250442_71278523	circRNA	ENSCHIG00000011428	ARHGAP29	Rho GTPase activating protein 29 [Source:NCBI gene;Acc:102185622]	-0.865901	0.000271496	0.00361449	no
28_39154	16_62008118_62074761	circRNA				-0.655032	0.0207834	0.0460228	no
16_25995	4_41207111_41254724	circRNA	ENSCHIG00000015297	GLI3	GLI family zinc finger 3 [Source:NCBI gene;Acc:102178142]	-0.855634	0.000385575	0.00442408	no
LWLT01000021.1_40726	24_10984009_11000039	circRNA	ENSCHIG00000016363	CDH7	cadherin 7 [Source:NCBI gene;Acc:102169638]	-0.713287	0.00920178	0.0258316	no
20_31366	23_42333788_42406135	circRNA	ENSCHIG00000020109			-0.670628	0.0169891	0.039947	no
2_2962	7_106070143_106081450	circRNA	ENSCHIG00000026141	OBSCN	obscurin, cytoskeletal calmodulin and titin-interacting RhoGEF [Source:NCBI gene;Acc:106502252]	-0.670063	0.0171168	0.0401854	no
20_31366	14_1349025_1356777	circRNA				-0.825175	0.000951363	0.00690982	no
20_31366	1_70019001_70030025	circRNA	ENSCHIG00000025525	LRCH3	leucine rich repeats and calponin homology domain containing 3 [Source:NCBI gene;Acc:102170820]	-0.710612	0.0095911	0.0267656	no
20_31366	23_42333788_42392758	circRNA	ENSCHIG00000020109			-0.661513	0.0191385	0.0436213	no
28_39193	7_85052007_85118197	circRNA	ENSCHIG00000013312	FBN2	fibrillin 2 [Source:NCBI gene;Acc:102173553]	-0.609096	0.0355341	0.0671753	no
21_32908	6_46267159_46293564	circRNA	ENSCHIG00000022041	RBPJ	recombination signal binding protein for immunoglobulin kappa J region [Source:NCBI gene;Acc:102185075]	-0.727273	0.00735503	0.0224232	no
20_31366	3_26908088_26924264	circRNA	ENSCHIG00000023944	TUT4	terminal uridylyl transferase 4 [Source:NCBI gene;Acc:102184303]	-0.640861	0.0247359	0.0520105	no
14_23147	16_63542706_63560758	circRNA	ENSCHIG00000017821	RGL1	ral guanine nucleotide dissociation stimulator like 1 [Source:NCBI gene;Acc:102173025]	-0.636364	0.0260969	0.0536812	no
20_31366	24_41105431_41135344	circRNA	ENSCHIG00000015240	PTPRM	protein tyrosine phosphatase, receptor type M [Source:NCBI gene;Acc:102173248]	-0.643357	0.0240032	0.0507254	no
16_26351	5_41858147_41881467	circRNA	ENSCHIG00000026435	CPNE8	copine 8 [Source:NCBI gene;Acc:102190022]	-0.841246	0.000604448	0.00565106	no
1_2195	10_91508829_91592619	circRNA	ENSCHIG00000014180	LHFPL2	LHFPL tetraspan subfamily member 2 [Source:NCBI gene;Acc:102189127]	-0.683116	0.014339	0.0354035	no
20_31366	1_7833330_7845998	circRNA	ENSCHIG00000018986	ADAMTS5	ADAM metallopeptidase with thrombospondin type 1 motif 5 [Source:NCBI gene;Acc:102172097]	-0.811189	0.00136331	0.00845946	no
1_2195	LWLT01000042.1_310269_326220	circRNA	ENSCHIG00000000152	MAPK1	mitogen-activated protein kinase 1 [Source:NCBI gene;Acc:102186040]	-0.867133	0.000259812	0.00349172	no
19_30750	7_14146902_14183277	circRNA	ENSCHIG00000012539	LNPEP	leucyl and cystinyl aminopeptidase [Source:NCBI gene;Acc:102186394]	-0.797625	0.00188209	0.0103462	no
22_33210	LWLT01000033.1_487666_506588	circRNA	ENSCHIG00000015457	CASK	calcium/calmodulin dependent serine protein kinase [Source:NCBI gene;Acc:102171047]	-0.748749	0.0050783	0.0182641	no
19_29953	12_60568820_60613884	circRNA	ENSCHIG00000024367	NBEA	neurobeachin [Source:NCBI gene;Acc:102186605]	-0.626434	0.0292927	0.0585383	no
23_34294	2_107548050_107575268	circRNA				-0.612961	0.0340673	0.0651041	no
20_31366	6_2399934_2465968	circRNA				-0.725137	0.00761729	0.0227305	no
11_19942	10_55012180_55025412	circRNA	ENSCHIG00000021131	VPS13C	vacuolar protein sorting 13 homolog C [Source:NCBI gene;Acc:106501903]	-0.748749	0.0050783	0.0182641	no
22_33210	27_26263263_26281959	circRNA	ENSCHIG00000018661	PCM1	pericentriolar material 1 [Source:NCBI gene;Acc:102191676]	-0.752674	0.00472788	0.0174375	no
2_2962	18_21745096_21775026	circRNA	ENSCHIG00000014739	NETO2	neuropilin and tolloid like 2 [Source:NCBI gene;Acc:102182820]	-0.809879	0.00140794	0.00866593	no
26_37440	5_115017045_115041174	circRNA	ENSCHIG00000014589	ATXN10	ataxin 10 [Source:NCBI gene;Acc:102177039]	-0.757204	0.00434648	0.0174375	no
20_31366	LWLT01000033.1_487666_506588	circRNA	ENSCHIG00000015457	CASK	calcium/calmodulin dependent serine protein kinase [Source:NCBI gene;Acc:102171047]	-0.72537	0.00758833	0.0227305	no
20_31366	14_12624379_12660440	circRNA				-0.654946	0.0208059	0.0460228	no
7_12315	12_40186002_40205920	circRNA	ENSCHIG00000003476	DACH1	dachshund family transcription factor 1 [Source:NCBI gene;Acc:102178371]	-0.774667	0.00308965	0.0140567	no
2_2414	7_172120_230877	circRNA	ENSCHIG00000011930	CAMK4	calcium/calmodulin dependent protein kinase IV [Source:NCBI gene;Acc:102187484]	-0.72028	0.00823977	0.0240034	no
21_32357	7_30508968_30606262	circRNA	ENSCHIG00000025474		teneurin-2 [Source:NCBI gene;Acc:108633191]	-0.753931	0.0046196	0.0174375	no
22_33210	16_20403453_20432602	circRNA	ENSCHIG00000022660	TGFB2	transforming growth factor beta 2 [Source:NCBI gene;Acc:100861228]	-0.748749	0.0050783	0.0182641	no
20_31366	1_44775766_44792088	circRNA	ENSCHIG00000022648		transmembrane protein 45A [Source:NCBI gene;Acc:102180889]	-0.633552	0.0269747	0.0552864	no
19_30034	2_111987328_111999238	circRNA				-0.761853	0.00397973	0.0162346	no
19_29953	13_57238800_57259672	circRNA	ENSCHIG00000023510	VAPB	VAMP associated protein B and C [Source:NCBI gene;Acc:102176246]	-0.839161	0.000642826	0.00565106	no
20_31366	16_43412593_43466290	circRNA	ENSCHIG00000025014	RERE	arginine-glutamic acid dipeptide repeats [Source:NCBI gene;Acc:102178646]	-0.612961	0.0340673	0.0651041	no
19_29204	2_42407861_42445850	circRNA	ENSCHIG00000007723	PARD3B	par-3 family cell polarity regulator beta [Source:NCBI gene;Acc:102173793]	-0.631463	0.0276408	0.0564941	no
19_30416	6_2399934_2465968	circRNA				-0.624169	0.0300595	0.0599801	no
4_7489	10_90131230_90146154	circRNA	ENSCHIG00000024576	SERINC5	serine incorporator 5 [Source:NCBI gene;Acc:102190521]	-0.831007	0.000811316	0.00638565	no
22_33210	10_91508829_91592619	circRNA	ENSCHIG00000014180	LHFPL2	LHFPL tetraspan subfamily member 2 [Source:NCBI gene;Acc:102189127]	-0.748749	0.0050783	0.0182641	no
21_32431	4_28177351_28196356	circRNA	ENSCHIG00000023390	SND1	staphylococcal nuclease and tudor domain containing 1 [Source:NCBI gene;Acc:102172121]	-0.862885	0.000301821	0.00390812	no
19_29204	24_45892343_45910674	circRNA	ENSCHIG00000003358	EPG5	ectopic P-granules autophagy protein 5 homolog [Source:NCBI gene;Acc:102183560]	-0.802914	0.00166448	0.00960534	no
5_9081	12_40186002_40205920	circRNA	ENSCHIG00000003476	DACH1	dachshund family transcription factor 1 [Source:NCBI gene;Acc:102178371]	-0.690158	0.0129864	0.0330361	no
21_32431	19_18405450_18435938	circRNA	ENSCHIG00000010629	NF1	neurofibromin 1 [Source:NCBI gene;Acc:102183001]	-0.748608	0.00509129	0.0182641	no
20_31366	LWLT01000021.1_8553591_8594629	circRNA				-0.58485	0.0457805	0.0806553	no
LWLT01000027.1_41541	16_54872062_54880782	circRNA	ENSCHIG00000016451	TNN	tenascin N [Source:NCBI gene;Acc:102181229]	-0.725137	0.00761729	0.0227305	no
22_33210	14_33358612_33374397	circRNA	ENSCHIG00000015490	TRPS1	transcriptional repressor GATA binding 1 [Source:NCBI gene;Acc:102184827]	-0.734316	0.00653792	0.0208088	no
19_29953	LWLT01000021.1_53251116_53322201	circRNA	ENSCHIG00000011491	REPS2	RALBP1 associated Eps domain containing 2 [Source:NCBI gene;Acc:102174285]	-0.767076	0.00359618	0.0155115	no
19_29953	21_63533632_63560955	circRNA	ENSCHIG00000019860	BCL11B	BCL11B, BAF complex component [Source:NCBI gene;Acc:102177104]	-0.859176	0.000342671	0.0040416	no
19_29204	10_91508829_91592619	circRNA	ENSCHIG00000014180	LHFPL2	LHFPL tetraspan subfamily member 2 [Source:NCBI gene;Acc:102189127]	-0.638298	0.0255051	0.0534215	no
19_29953	5_105662044_105677440	circRNA				-0.690636	0.0128981	0.0329211	no
19_29953	3_63276860_63312137	circRNA	ENSCHIG00000020640	COL24A1	collagen type XXIV alpha 1 chain [Source:NCBI gene;Acc:102185420]	-0.850668	0.000452626	0.00472378	no
14_23147	23_42333788_42406135	circRNA	ENSCHIG00000020109			-0.85778	0.000359119	0.00414931	no
19_29953	3_40056419_40078403	circRNA	ENSCHIG00000012365	CACHD1	cache domain containing 1 [Source:NCBI gene;Acc:102183121]	-0.665586	0.0181548	0.0422524	no
14_23147	21_65000513_65014965	circRNA				-0.81879	0.00112535	0.00771266	no
19_29204	5_102268251_102304409	circRNA	ENSCHIG00000023479	C1R	complement C1r [Source:NCBI gene;Acc:102188835]	-0.690158	0.0129864	0.0330361	no
2_2962	22_58305714_58404500	circRNA				-0.699301	0.0113742	0.0299838	no
20_31366	19_14385907_14397043	circRNA	ENSCHIG00000019283		adaptor related protein complex 2 subunit beta 1 [Source:NCBI gene;Acc:102172093]	-0.66283	0.0188163	0.0430403	no
14_23147	16_62008118_62074761	circRNA				-0.873376	0.000206495	0.00311162	no
20_31366	7_106073544_106081450	circRNA	ENSCHIG00000026141	OBSCN	obscurin, cytoskeletal calmodulin and titin-interacting RhoGEF [Source:NCBI gene;Acc:106502252]	-0.752674	0.00472788	0.0174375	no
16_25995	6_102395509_102396945	circRNA	ENSCHIG00000008450	AFF1	AF4/FMR2 family member 1 [Source:NCBI gene;Acc:102185996]	-0.718328	0.00850036	0.0246432	no
19_29953	2_42407861_42445850	circRNA	ENSCHIG00000007723	PARD3B	par-3 family cell polarity regulator beta [Source:NCBI gene;Acc:102173793]	-0.806183	0.00153995	0.00936809	no
26_37409	4_41207111_41254724	circRNA	ENSCHIG00000015297	GLI3	GLI family zinc finger 3 [Source:NCBI gene;Acc:102178142]	-0.732365	0.00675706	0.0213375	no
21_32431	24_23828087_23885973	circRNA	ENSCHIG00000000206	ASXL3	ASXL transcriptional regulator 3 [Source:NCBI gene;Acc:102185524]	-0.812127	0.00133201	0.00845946	no
14_23147	3_40056419_40078403	circRNA	ENSCHIG00000012365	CACHD1	cache domain containing 1 [Source:NCBI gene;Acc:102183121]	-0.783042	0.00259583	0.0125554	no
19_29953	10_91508829_91592619	circRNA	ENSCHIG00000014180	LHFPL2	LHFPL tetraspan subfamily member 2 [Source:NCBI gene;Acc:102189127]	-0.647903	0.0227091	0.0488963	no
19_29953	2_29711456_29798577	circRNA				-0.892027	9.62e-05	0.00217169	no
16_26351	6_68272249_68299586	circRNA	ENSCHIG00000024006	DCUN1D4	defective in cullin neddylation 1 domain containing 4 [Source:NCBI gene;Acc:102178894]	-0.821113	0.00105943	0.007581	no
LWLT01000027.1_41541	7_14454570_14464761	circRNA	ENSCHIG00000027166	CAST	calpastatin [Source:NCBI gene;Acc:100861304]	-0.887346	0.000117937	0.00230645	no
1_2195	10_96324160_96341261	circRNA	ENSCHIG00000025037	LVRN	laeverin [Source:NCBI gene;Acc:102185571]	-0.861346	0.000318283	0.00393286	no
LWLT01000021.1_40726	LWLT01000021.1_51692245_51705256	circRNA				-0.629371	0.0283197	0.0569031	no
20_31366	6_46267159_46293564	circRNA	ENSCHIG00000022041	RBPJ	recombination signal binding protein for immunoglobulin kappa J region [Source:NCBI gene;Acc:102185075]	-0.587413	0.0446093	0.0788368	no
28_39193	18_21745096_21775026	circRNA	ENSCHIG00000014739	NETO2	neuropilin and tolloid like 2 [Source:NCBI gene;Acc:102182820]	-0.6134	0.0339033	0.0649094	no
16_26351	8_27506440_27547321	circRNA	ENSCHIG00000026061	BNC2	basonuclin 2 [Source:NCBI gene;Acc:102186591]	-0.757663	0.00430913	0.0173361	no
4_7489	2_51163786_51203156	circRNA	ENSCHIG00000012868	HECW2	HECT, C2 and WW domain containing E3 ubiquitin protein ligase 2 [Source:NCBI gene;Acc:102169918]	-0.72028	0.00823977	0.0240034	no
20_31366	13_33179100_33272240	circRNA	ENSCHIG00000016385	ZEB1	zinc finger E-box binding homeobox 1 [Source:NCBI gene;Acc:106502734]	-0.86014	0.000331668	0.00393286	no
7_12315	7_30508968_30606262	circRNA	ENSCHIG00000025474		teneurin-2 [Source:NCBI gene;Acc:108633191]	-0.742734	0.00565303	0.0197721	no
LWLT01000027.1_41541	8_55432434_55460431	circRNA	ENSCHIG00000019651	TLE4	TLE family member 4, transcriptional corepressor [Source:NCBI gene;Acc:102171243]	-0.734316	0.00653792	0.0208088	no
4_7489	14_12624379_12660440	circRNA				-0.690158	0.0129864	0.0330361	no
5_9081	7_30508968_30606262	circRNA	ENSCHIG00000025474		teneurin-2 [Source:NCBI gene;Acc:108633191]	-0.675552	0.0159045	0.0381148	no
chi-miR-497-5p	ENSCHIT00000030403	mRNA	ENSCHIG00000020473	RAI1	retinoic acid induced 1 [Source:NCBI gene;Acc:102183543]	-0.895105	8.37e-05	0.00191113	no
chi-miR-362-5p	ENSCHIT00000041732	mRNA	ENSCHIG00000027220	GRB7	growth factor receptor bound protein 7 [Source:NCBI gene;Acc:102182906]	-0.951049	2.04e-06	0.000293208	no
chi-miR-380-5p	ENSCHIT00000030751	mRNA	ENSCHIG00000020676	BBS2	Bardet-Biedl syndrome 2 [Source:NCBI gene;Acc:102187619]	-0.78828	0.00231914	0.0117679	no
chi-miR-29b-5p	ENSCHIT00000022995	mRNA	ENSCHIG00000015898	ALPK3	alpha kinase 3 [Source:NCBI gene;Acc:102188535]	-0.594406	0.0415215	0.0747889	no
chi-miR-1306-3p	ENSCHIT00000021725	mRNA	ENSCHIG00000015158	CYP17A1	steroid 17-alpha-hydroxylase/17,20 lyase [Source:NCBI gene;Acc:102182663]	-0.940357	5.38e-06	0.000515445	no
chi-miR-338-3p	ENSCHIT00000030808	mRNA	ENSCHIG00000020738	FGF9	fibroblast growth factor 9 [Source:NCBI gene;Acc:102169602]	-0.832168	0.000785442	0.00623472	no
chi-miR-143-3p	ENSCHIT00000005056	mRNA	ENSCHIG00000003728	KERA	keratocan [Source:NCBI gene;Acc:102175745]	-0.678322	0.0153173	0.0368991	no
chi-miR-133b	ENSCHIT00000033274	mRNA	ENSCHIG00000022176	FREM2	FRAS1 related extracellular matrix protein 2 [Source:NCBI gene;Acc:102171617]	-0.601399	0.0385885	0.0708848	no
chi-miR-143-3p	ENSCHIT00000011818	mRNA	ENSCHIG00000008392	CACNA1G	calcium voltage-gated channel subunit alpha1 G [Source:NCBI gene;Acc:102187163]	-0.79021	0.00222314	0.0113699	no
chi-miR-3431-5p	ENSCHIT00000000806	mRNA	ENSCHIG00000000503	CRYBG2	crystallin beta-gamma domain containing 2 [Source:NCBI gene;Acc:102180903]	-0.797203	0.00190037	0.0103462	no
chi-miR-200a	ENSCHIT00000015124	mRNA	ENSCHIG00000010895	NCOA2	nuclear receptor coactivator 2 [Source:NCBI gene;Acc:102176142]	-0.755245	0.00450843	0.0174375	no
chi-miR-127-5p	ENSCHIT00000019769	mRNA	ENSCHIG00000013927	PTBP3	polypyrimidine tract binding protein 3 [Source:NCBI gene;Acc:102191137]	-0.811189	0.00136331	0.00845946	no
chi-miR-200c	ENSCHIT00000014000	mRNA	ENSCHIG00000010160	JAM3	junctional adhesion molecule 3 [Source:HGNC Symbol;Acc:HGNC:15532]	-0.881119	0.000152674	0.00263758	no
chi-miR-708-5p	ENSCHIT00000035766	mRNA	ENSCHIG00000023621	CRY2	cryptochrome circadian regulator 2 [Source:NCBI gene;Acc:102183085]	-0.629371	0.0283197	0.0569031	no
chi-miR-708-5p	ENSCHIT00000023928	mRNA	ENSCHIG00000016482	ANGEL1	angel homolog 1 [Source:NCBI gene;Acc:102176538]	-0.752674	0.00472788	0.0174375	no
chi-miR-1197-3p	ENSCHIT00000023497	mRNA	ENSCHIG00000016191	PPA1	pyrophosphatase (inorganic) 1 [Source:NCBI gene;Acc:100861078]	-0.601399	0.0385885	0.0708848	no
chi-miR-412-3p	ENSCHIT00000008946	mRNA	ENSCHIG00000005571	ITGB4	integrin subunit beta 4 [Source:NCBI gene;Acc:102191175]	-0.713287	0.00920178	0.0258316	no
chi-miR-487a-3p	ENSCHIT00000029440	mRNA	ENSCHIG00000019826	CARMIL1	capping protein regulator and myosin 1 linker 1 [Source:NCBI gene;Acc:102182743]	-0.714537	0.00902393	0.0258316	no
chi-miR-487b-3p	ENSCHIT00000016521	mRNA	ENSCHIG00000011836	FAM160A1	family with sequence similarity 160 member A1 [Source:NCBI gene;Acc:102171451]	-0.741259	0.00580115	0.0197721	no
chi-miR-502b-3p	ENSCHIT00000020944	mRNA	ENSCHIG00000014635	DOP1B	DOP1 leucine zipper like protein B [Source:NCBI gene;Acc:102178575]	-0.903679	5.54e-05	0.00158955	no
chi-miR-29b-3p	ENSCHIT00000031366	mRNA	ENSCHIG00000021041	CDO1	cysteine dioxygenase type 1 [Source:NCBI gene;Acc:102190230]	-0.633976	0.0268409	0.0551089	no
chi-miR-125a-5p	ENSCHIT00000024579	mRNA	ENSCHIG00000016866	EPAS1	endothelial PAS domain protein 1 [Source:NCBI gene;Acc:102180230]	-0.622378	0.0306759	0.0602888	no
chi-miR-184	ENSCHIT00000032409	mRNA	ENSCHIG00000021643	DNAH9	dynein axonemal heavy chain 9 [Source:NCBI gene;Acc:102175517]	-0.624117	0.0300772	0.0600092	no
chi-miR-193b-3p	ENSCHIT00000031168	mRNA	ENSCHIG00000020744	TNC	tenascin C [Source:NCBI gene;Acc:102179198]	-0.944056	3.93e-06	0.000389781	no
chi-miR-146b-3p	ENSCHIT00000025647	mRNA	ENSCHIG00000017516	LIMD1	LIM domains containing 1 [Source:NCBI gene;Acc:102186726]	-0.734266	0.00654349	0.0208088	no
chi-miR-3431-5p	ENSCHIT00000021680	mRNA	ENSCHIG00000015127	SPRYD7	SPRY domain containing 7 [Source:NCBI gene;Acc:102182141]	-0.791595	0.0021561	0.0113699	no
chi-miR-3431-5p	ENSCHIT00000019260	mRNA	ENSCHIG00000013607	LBR	lamin B receptor [Source:NCBI gene;Acc:102187420]	-0.657343	0.0201855	0.0449851	no
chi-miR-211	ENSCHIT00000018607	mRNA	ENSCHIG00000013177	TACC2	transforming acidic coiled-coil containing protein 2 [Source:NCBI gene;Acc:102173157]	-0.706294	0.0102452	0.0279658	no
chi-miR-34a	ENSCHIT00000024608	mRNA	ENSCHIG00000016914	HIVEP1	human immunodeficiency virus type I enhancer binding protein 1 [Source:NCBI gene;Acc:102187442]	-0.804196	0.00161477	0.00939149	no
chi-miR-188-5p	ENSCHIT00000038432	mRNA	ENSCHIG00000025211	KITLG	KIT ligand [Source:NCBI gene;Acc:100860807]	-0.727273	0.00735503	0.0224232	no
chi-miR-34a	ENSCHIT00000024354	mRNA	ENSCHIG00000016771	TRAF5	TNF receptor associated factor 5 [Source:NCBI gene;Acc:102188243]	-0.594406	0.0415215	0.0747889	no
chi-miR-127-5p	ENSCHIT00000019881	mRNA	ENSCHIG00000013994	AS3MT	arsenite methyltransferase [Source:NCBI gene;Acc:100861071]	-0.73205	0.00679293	0.0213963	no
chi-miR-136-5p	ENSCHIT00000036655	mRNA	ENSCHIG00000024161	KIFC3	kinesin family member C3 [Source:NCBI gene;Acc:102172378]	-0.653192	0.0212685	0.0469558	no
chi-miR-200c	ENSCHIT00000014190	mRNA	ENSCHIG00000010227		piezo type mechanosensitive ion channel component 2 [Source:NCBI gene;Acc:102178229]	-0.888112	0.000114134	0.00224534	no
chi-miR-3955-5p	ENSCHIT00000001582	mRNA	ENSCHIG00000000920	NAV2	neuron navigator 2 [Source:NCBI gene;Acc:102185718]	-0.72028	0.00823977	0.0240034	no
chi-miR-135b-5p	ENSCHIT00000022939	mRNA	ENSCHIG00000015905	RIN3	Ras and Rab interactor 3 [Source:NCBI gene;Acc:102182917]	-0.699301	0.0113742	0.0299838	no
chi-let-7b-5p	ENSCHIT00000008082	mRNA	ENSCHIG00000006038	GPR27	G protein-coupled receptor 27 [Source:NCBI gene;Acc:106503457]	-0.818182	0.0011431	0.00771266	no
chi-miR-211	ENSCHIT00000017644	mRNA	ENSCHIG00000012553	ATP2C2	ATPase secretory pathway Ca2+ transporting 2 [Source:NCBI gene;Acc:102185946]	-0.588712	0.0440238	0.0786776	no
chi-miR-487a-5p	ENSCHIT00000039406	mRNA	ENSCHIG00000025819	TRPC3	transient receptor potential cation channel subfamily C member 3 [Source:NCBI gene;Acc:102184361]	-0.902098	6e-05	0.00158955	no
chi-miR-19b-5p	ENSCHIT00000006880	mRNA	ENSCHIG00000004522	PCSK5	proprotein convertase subtilisin/kexin type 5 [Source:NCBI gene;Acc:102187133]	-0.615385	0.0331699	0.0636096	no
chi-miR-502b-3p	ENSCHIT00000040300	mRNA	ENSCHIG00000026396	EPB41L4A	erythrocyte membrane protein band 4.1 like 4A [Source:NCBI gene;Acc:102187406]	-0.629371	0.0283197	0.0569031	no
chi-miR-29a-3p	ENSCHIT00000014657	mRNA	ENSCHIG00000010599	GAL3ST1	galactose-3-O-sulfotransferase 1 [Source:NCBI gene;Acc:102169694]	-0.72028	0.00823977	0.0240034	no
chi-miR-296-3p	ENSCHIT00000016011	mRNA	ENSCHIG00000011482	ACSBG1	acyl-CoA synthetase bubblegum family member 1 [Source:NCBI gene;Acc:102181437]	-0.576458	0.0497673	0.0856272	no
chi-miR-34a	ENSCHIT00000034170	mRNA	ENSCHIG00000022698	NKD2	NKD2, WNT signaling pathway inhibitor [Source:NCBI gene;Acc:106504040]	-0.965035	3.88e-07	0.000128207	no
chi-miR-3431-5p	ENSCHIT00000040903	mRNA	ENSCHIG00000026741	AHCY	adenosylhomocysteinase [Source:NCBI gene;Acc:102191350]	-0.902098	6e-05	0.00158955	no
chi-miR-335-3p	ENSCHIT00000035864	mRNA	ENSCHIG00000023656	CLPX	caseinolytic mitochondrial matrix peptidase chaperone subunit [Source:NCBI gene;Acc:102183330]	-0.781087	0.0027053	0.0129429	no
chi-miR-146b-5p	ENSCHIT00000035356	mRNA	ENSCHIG00000023391	CSRNP3	cysteine and serine rich nuclear protein 3 [Source:NCBI gene;Acc:102179892]	-0.686749	0.0136288	0.0344654	no
chi-miR-497-5p	ENSCHIT00000021958	mRNA	ENSCHIG00000015267	PHKB	phosphorylase kinase regulatory subunit beta [Source:NCBI gene;Acc:102175235]	-0.596632	0.0405712	0.0740882	no
chi-miR-1306-3p	ENSCHIT00000041225	mRNA	ENSCHIG00000026942	2023-09-09	septin 9 [Source:NCBI gene;Acc:102181234]	-0.699301	0.0113742	0.0299838	no
chi-miR-433	ENSCHIT00000010682	mRNA	ENSCHIG00000007749	ZSWIM4	zinc finger SWIM-type containing 4 [Source:NCBI gene;Acc:102174646]	-0.671329	0.0168315	0.0396093	no
chi-miR-136-5p	ENSCHIT00000031937	mRNA	ENSCHIG00000021403	KIF16B	kinesin family member 16B [Source:NCBI gene;Acc:102170332]	-0.616347	0.0328184	0.0636096	no
chi-miR-34c-3p	ENSCHIT00000028580	mRNA	ENSCHIG00000019301	CLCN3	chloride voltage-gated channel 3 [Source:NCBI gene;Acc:102189584]	-0.685315	0.013906	0.0344654	no
chi-miR-195-5p	ENSCHIT00000020833	mRNA	ENSCHIG00000014561	PIAS2	protein inhibitor of activated STAT 2 [Source:NCBI gene;Acc:102186543]	-0.825175	0.000951363	0.00690982	no
chi-miR-146b-5p	ENSCHIT00000019971	mRNA	ENSCHIG00000014059	NXPH2	neurexophilin 2 [Source:NCBI gene;Acc:102172848]	-0.923077	1.86e-05	0.000857647	no
chi-miR-154b-5p	ENSCHIT00000009016	mRNA	ENSCHIG00000006738		SEC11 homolog C, signal peptidase complex subunit [Source:NCBI gene;Acc:100861334]	-0.755245	0.00450843	0.0174375	no
chi-miR-412-3p	ENSCHIT00000034589	mRNA	ENSCHIG00000022954	HERC6	HECT and RLD domain containing E3 ubiquitin protein ligase family member 6 [Source:NCBI gene;Acc:102189747]	-0.619966	0.0315202	0.0617436	no
chi-miR-485-5p	ENSCHIT00000014857	mRNA	ENSCHIG00000010733		cationic amino acid transporter 3-like [Source:NCBI gene;Acc:108634701]	-0.839161	0.000642826	0.00565106	no
chi-miR-17-5p	ENSCHIT00000021045	mRNA	ENSCHIG00000014739	NETO2	neuropilin and tolloid like 2 [Source:NCBI gene;Acc:102182820]	-0.783217	0.00258622	0.0125455	no
chi-let-7b-5p	ENSCHIT00000013618	mRNA	ENSCHIG00000009894	GPR17	G protein-coupled receptor 17 [Source:NCBI gene;Acc:102175064]	-0.748252	0.00512408	0.0182641	no
chi-miR-532-5p	ENSCHIT00000033890	mRNA	ENSCHIG00000022525	UBASH3A	ubiquitin associated and SH3 domain containing A [Source:NCBI gene;Acc:102190557]	-0.867759	0.00025403	0.00349172	no
chi-miR-378-5p	ENSCHIT00000010636	mRNA	ENSCHIG00000007762	NUMA1	nuclear mitotic apparatus protein 1 [Source:NCBI gene;Acc:102171630]	-0.608392	0.035806	0.0671753	no
chi-miR-130b-5p	ENSCHIT00000041070	mRNA	ENSCHIG00000026831	ARHGEF12	Rho guanine nucleotide exchange factor 12 [Source:NCBI gene;Acc:102179302]	-0.752674	0.00472788	0.0174375	no
chi-miR-154b-5p	ENSCHIT00000031361	mRNA	ENSCHIG00000021024	CAPG	capping actin protein, gelsolin like [Source:NCBI gene;Acc:102187497]	-0.902098	6e-05	0.00158955	no
chi-miR-224-5p	ENSCHIT00000039660	mRNA	ENSCHIG00000026003	PALMD	palmdelphin [Source:NCBI gene;Acc:102179339]	-0.886166	0.000123989	0.00239414	no
chi-miR-154b-5p	ENSCHIT00000031368	mRNA	ENSCHIG00000021024	CAPG	capping actin protein, gelsolin like [Source:NCBI gene;Acc:102187497]	-0.797203	0.00190037	0.0103462	no
chi-miR-1185-3p	ENSCHIT00000038222	mRNA	ENSCHIG00000025141	SPINT1	serine peptidase inhibitor, Kunitz type 1 [Source:NCBI gene;Acc:102172450]	-0.783217	0.00258622	0.0125455	no
chi-miR-497-5p	ENSCHIT00000041022	mRNA	ENSCHIG00000026815	ADAMTS4	ADAM metallopeptidase with thrombospondin type 1 motif 4 [Source:NCBI gene;Acc:102176281]	-0.622378	0.0306759	0.0602888	no
chi-miR-143-3p	ENSCHIT00000026362	mRNA	ENSCHIG00000017866	BIN1	bridging integrator 1 [Source:NCBI gene;Acc:102182970]	-0.755245	0.00450843	0.0174375	no
chi-miR-17-5p	ENSCHIT00000015579	mRNA	ENSCHIG00000011185	TENM3	teneurin transmembrane protein 3 [Source:NCBI gene;Acc:102185807]	-0.664336	0.0184527	0.0422524	no
chi-miR-497-5p	ENSCHIT00000028465	mRNA	ENSCHIG00000019222	ABHD8	abhydrolase domain containing 8 [Source:NCBI gene;Acc:102174923]	-0.79021	0.00222314	0.0113699	no
chi-miR-24-3p	ENSCHIT00000027645	mRNA	ENSCHIG00000018706		leukocyte immunoglobulin-like receptor subfamily A member 5 [Source:NCBI gene;Acc:102174835]	-0.895105	8.37e-05	0.00191113	no
chi-miR-500-3p	ENSCHIT00000019297	mRNA	ENSCHIG00000013613	DSP	desmoplakin [Source:NCBI gene;Acc:102175346]	-0.783217	0.00258622	0.0125455	no
chi-miR-487a-3p	ENSCHIT00000029678	mRNA	ENSCHIG00000019958	PPP2R1B	protein phosphatase 2 scaffold subunit Abeta [Source:NCBI gene;Acc:102170070]	-0.902098	6e-05	0.00158955	no
chi-miR-500-3p	ENSCHIT00000034165	mRNA	ENSCHIG00000022678	ASPSCR1	ASPSCR1, UBX domain containing tether for SLC2A4 [Source:NCBI gene;Acc:102179135]	-0.62384	0.030172	0.0601259	no
chi-miR-412-3p	ENSCHIT00000013904	mRNA	ENSCHIG00000010090	RNF19B	ring finger protein 19B [Source:NCBI gene;Acc:102169814]	-0.685315	0.013906	0.0344654	no
chi-miR-1306-3p	ENSCHIT00000024189	mRNA	ENSCHIG00000016617	IDE	insulin degrading enzyme [Source:NCBI gene;Acc:102173809]	-0.818182	0.0011431	0.00771266	no
chi-miR-141	ENSCHIT00000016934	mRNA	ENSCHIG00000012119	WASF1	WAS protein family member 1 [Source:NCBI gene;Acc:102183793]	-0.825175	0.000951363	0.00690982	no
chi-miR-141	ENSCHIT00000014718	mRNA	ENSCHIG00000010241	PDE4DIP	phosphodiesterase 4D interacting protein [Source:NCBI gene;Acc:102171475]	-0.85778	0.000359119	0.00414931	no
chi-miR-338-3p	ENSCHIT00000017233	mRNA	ENSCHIG00000012309	SIX4	SIX homeobox 4 [Source:NCBI gene;Acc:102173941]	-0.756569	0.00439849	0.0174375	no
chi-miR-146b-5p	ENSCHIT00000032760	mRNA	ENSCHIG00000021900			-0.825175	0.000951363	0.00690982	no
chi-miR-141	ENSCHIT00000014540	mRNA	ENSCHIG00000010241	PDE4DIP	phosphodiesterase 4D interacting protein [Source:NCBI gene;Acc:102171475]	-0.865578	0.000274627	0.00361735	no
chi-miR-143-3p	ENSCHIT00000041388	mRNA	ENSCHIG00000027048	SYT13	synaptotagmin 13 [Source:NCBI gene;Acc:102190623]	-0.748252	0.00512408	0.0182641	no
chi-miR-27a-3p	ENSCHIT00000000257	mRNA	ENSCHIG00000000170	ELF4	E74 like ETS transcription factor 4 [Source:NCBI gene;Acc:102175752]	-0.657343	0.0201855	0.0449851	no
chi-miR-17-5p	ENSCHIT00000037505	mRNA	ENSCHIG00000024703	GALNT16	polypeptide N-acetylgalactosaminyltransferase 16 [Source:NCBI gene;Acc:102177245]	-0.622378	0.0306759	0.0602888	no
chi-miR-146b-5p	ENSCHIT00000012489	mRNA	ENSCHIG00000009059	SLC6A13	solute carrier family 6 member 13 [Source:NCBI gene;Acc:102183579]	-0.691755	0.0126933	0.0324651	no
chi-miR-379-3p	ENSCHIT00000029614	mRNA	ENSCHIG00000019917	TRPM6	transient receptor potential cation channel subfamily M member 6 [Source:NCBI gene;Acc:102185359]	-0.741259	0.00580115	0.0197721	no
chi-miR-493-3p	ENSCHIT00000024314	mRNA	ENSCHIG00000016585		myosin VB [Source:NCBI gene;Acc:102168225]	-0.688121	0.0133675	0.0339142	no
chi-miR-154b-5p	ENSCHIT00000037738	mRNA	ENSCHIG00000024829	KRT40	keratin 40 [Source:NCBI gene;Acc:102169993]	-0.950728	2.11e-06	0.000298463	no
chi-miR-500-5p	ENSCHIT00000033389	mRNA	ENSCHIG00000022266	SYNPO2	synaptopodin 2 [Source:NCBI gene;Acc:102169568]	-0.853147	0.000418118	0.00442648	no
chi-let-7g-3p	ENSCHIT00000016031	mRNA	ENSCHIG00000011462	ADAM33	ADAM metallopeptidase domain 33 [Source:NCBI gene;Acc:102170333]	-0.804196	0.00161477	0.00939149	no
chi-miR-432-5p	ENSCHIT00000014803	mRNA	ENSCHIG00000010709		distal-less homeobox 3 [Source:NCBI gene;Acc:102189068]	-0.93007	1.17e-05	0.000710365	no
chi-miR-3958-3p	ENSCHIT00000016997	mRNA	ENSCHIG00000012173	WIF1	WNT inhibitory factor 1 [Source:NCBI gene;Acc:102180191]	-0.86014	0.000331668	0.00393286	no
chi-miR-378-3p	ENSCHIT00000032773	mRNA	ENSCHIG00000021840	PLEKHA6	pleckstrin homology domain containing A6 [Source:NCBI gene;Acc:102179968]	-0.661998	0.0190195	0.0433702	no
chi-miR-1306-3p	ENSCHIT00000018360	mRNA	ENSCHIG00000013035	SLC22A23	solute carrier family 22 member 23 [Source:NCBI gene;Acc:102178125]	-0.657343	0.0201855	0.0449851	no
chi-miR-136-5p	ENSCHIT00000019502	mRNA	ENSCHIG00000013732	RBBP6	RB binding protein 6, ubiquitin ligase [Source:NCBI gene;Acc:102172681]	-0.685315	0.013906	0.0344654	no
chi-miR-382-5p	ENSCHIT00000034856	mRNA	ENSCHIG00000023050	ETFDH	electron transfer flavoprotein dehydrogenase [Source:NCBI gene;Acc:102188522]	-0.664336	0.0184527	0.0422524	no
chi-miR-146b-5p	ENSCHIT00000023945	mRNA	ENSCHIG00000016498	DISP1	dispatched RND transporter family member 1 [Source:NCBI gene;Acc:102182522]	-0.58042	0.047856	0.0829136	no
chi-miR-214-3p	ENSCHIT00000004332	mRNA	ENSCHIG00000003190	XK	X-linked Kx blood group [Source:NCBI gene;Acc:102176212]	-0.881119	0.000152674	0.00263758	no
chi-miR-493-3p	ENSCHIT00000018121	mRNA	ENSCHIG00000012868	HECW2	HECT, C2 and WW domain containing E3 ubiquitin protein ligase 2 [Source:NCBI gene;Acc:102169918]	-0.670628	0.0169891	0.039947	no
chi-miR-432-3p	ENSCHIT00000040184	mRNA	ENSCHIG00000026332	KPNA7	karyopherin subunit alpha 7 [Source:NCBI gene;Acc:102172591]	-0.681218	0.0147206	0.0362175	no
chi-miR-543-5p	ENSCHIT00000002618	mRNA	ENSCHIG00000001165	SLC38A1	solute carrier family 38 member 1 [Source:NCBI gene;Acc:102191403]	-0.816113	0.00120515	0.00803301	no
chi-miR-432-3p	ENSCHIT00000031669	mRNA	ENSCHIG00000021186	HIPK2	homeodomain interacting protein kinase 2 [Source:NCBI gene;Acc:102177957]	-0.739055	0.00602782	0.0203162	no
chi-miR-24-3p	ENSCHIT00000013174	mRNA	ENSCHIG00000009576	ZNF532	zinc finger protein 532 [Source:NCBI gene;Acc:102173802]	-0.692308	0.012593	0.0322295	no
chi-miR-504	ENSCHIT00000018795	mRNA	ENSCHIG00000013313	OTOP2	otopetrin 2 [Source:NCBI gene;Acc:102176559]	-0.628229	0.028695	0.0575698	no
chi-miR-487a-3p	ENSCHIT00000029731	mRNA	ENSCHIG00000019977	SLC5A1	solute carrier family 5 member 1 [Source:NCBI gene;Acc:102174685]	-0.762238	0.00395045	0.0162346	no
chi-miR-224-5p	ENSCHIT00000033120	mRNA	ENSCHIG00000022104	CFAP69	cilia and flagella associated protein 69 [Source:NCBI gene;Acc:102179161]	-0.678322	0.0153173	0.0368991	no
chi-miR-338-3p	ENSCHIT00000015490	mRNA	ENSCHIG00000011152	GPR83	G protein-coupled receptor 83 [Source:NCBI gene;Acc:102189775]	-0.832168	0.000785442	0.00623472	no
chi-miR-665	ENSCHIT00000019158	mRNA	ENSCHIG00000013553	INAVA	innate immunity activator [Source:NCBI gene;Acc:102173112]	-0.727273	0.00735503	0.0224232	no
chi-miR-3431-5p	ENSCHIT00000015195	mRNA	ENSCHIG00000010948	DLX4	distal-less homeobox 4 [Source:NCBI gene;Acc:102189345]	-0.767076	0.00359618	0.0155115	no
chi-miR-378-5p	ENSCHIT00000029557	mRNA	ENSCHIG00000019875	MARK2	microtubule affinity regulating kinase 2 [Source:NCBI gene;Acc:102178248]	-0.832168	0.000785442	0.00623472	no
chi-miR-412-3p	ENSCHIT00000006471	mRNA	ENSCHIG00000004602	ANAPC2	anaphase promoting complex subunit 2 [Source:NCBI gene;Acc:102181216]	-0.685315	0.013906	0.0344654	no
chi-miR-34a	ENSCHIT00000015600	mRNA	ENSCHIG00000011011	RIMS1	regulating synaptic membrane exocytosis 1 [Source:NCBI gene;Acc:102184538]	-0.825175	0.000951363	0.00690982	no
chi-miR-504	ENSCHIT00000019154	mRNA	ENSCHIG00000013481	LLGL2	LLGL scribble cell polarity complex component 2 [Source:NCBI gene;Acc:102173503]	-0.678322	0.0153173	0.0368991	no
chi-miR-128-3p	ENSCHIT00000035904	mRNA	ENSCHIG00000023698	SESN2	sestrin 2 [Source:NCBI gene;Acc:102175632]	-0.916084	2.84e-05	0.00111082	no
chi-miR-493-3p	ENSCHIT00000031399	mRNA	ENSCHIG00000021073		family with sequence similarity 107 member B [Source:NCBI gene;Acc:102175591]	-0.713287	0.00920178	0.0258316	no
chi-miR-196b	ENSCHIT00000028864	mRNA	ENSCHIG00000019467		BOLA class I histocompatibility antigen, alpha chain BL3-7 [Source:NCBI gene;Acc:102181202]	-0.622378	0.0306759	0.0602888	no
chi-miR-378-3p	ENSCHIT00000014725	mRNA	ENSCHIG00000010626	TBL1XR1	transducin beta like 1 X-linked receptor 1 [Source:NCBI gene;Acc:102170182]	-0.608392	0.035806	0.0671753	no
chi-miR-184	ENSCHIT00000002796	mRNA	ENSCHIG00000001922	TGFB3	transforming growth factor beta 3 [Source:NCBI gene;Acc:102189962]	-0.704738	0.0104888	0.0285797	no
chi-miR-127-5p	ENSCHIT00000020594	mRNA	ENSCHIG00000014442	TCP11L2	t-complex 11 like 2 [Source:NCBI gene;Acc:102185987]	-0.825175	0.000951363	0.00690982	no
chi-miR-27b-3p	ENSCHIT00000017410	mRNA	ENSCHIG00000012435	CA3	carbonic anhydrase 3 [Source:NCBI gene;Acc:102175043]	-0.914187	3.17e-05	0.00118673	no
chi-miR-758	ENSCHIT00000012725	mRNA	ENSCHIG00000009134	NAE1	NEDD8 activating enzyme E1 subunit 1 [Source:NCBI gene;Acc:102175703]	-0.832168	0.000785442	0.00623472	no
chi-miR-409-3p	ENSCHIT00000020148	mRNA	ENSCHIG00000014093	ARAP2	ArfGAP with RhoGAP domain, ankyrin repeat and PH domain 2 [Source:NCBI gene;Acc:102187662]	-0.740331	0.00589582	0.0199952	no
chi-miR-296-3p	ENSCHIT00000016357	mRNA	ENSCHIG00000011742	CSF2RB	colony stimulating factor 2 receptor beta common subunit [Source:NCBI gene;Acc:102176401]	-0.601399	0.0385885	0.0708848	no
chi-let-7b-5p	ENSCHIT00000028780	mRNA	ENSCHIG00000019422	ABHD14A	abhydrolase domain containing 14A [Source:NCBI gene;Acc:102186640]	-0.608392	0.035806	0.0671753	no
chi-miR-23b-3p	ENSCHIT00000017880	mRNA	ENSCHIG00000012714	KLF12	Kruppel like factor 12 [Source:NCBI gene;Acc:102189320]	-0.741259	0.00580115	0.0197721	no
chi-let-7b-5p	ENSCHIT00000033299	mRNA	ENSCHIG00000022198	SLC6A7	solute carrier family 6 member 7 [Source:NCBI gene;Acc:102173466]	-0.633976	0.0268409	0.0551089	no
chi-miR-145-5p	ENSCHIT00000041054	mRNA	ENSCHIG00000026733		myosin heavy chain 1 [Source:NCBI gene;Acc:102181426]	-0.596143	0.0407785	0.0744324	no
chi-miR-429	ENSCHIT00000017328	mRNA	ENSCHIG00000012255	NAV3	neuron navigator 3 [Source:NCBI gene;Acc:102182566]	-0.748252	0.00512408	0.0182641	no
chi-miR-130b-5p	ENSCHIT00000004940	mRNA	ENSCHIG00000003716		interleukin 37 [Source:NCBI gene;Acc:102179292]	-0.817291	0.00116953	0.00785621	no
chi-miR-29c-3p	ENSCHIT00000025994	mRNA	ENSCHIG00000017585	TRPM2	transient receptor potential cation channel subfamily M member 2 [Source:NCBI gene;Acc:102171382]	-0.870042	0.000233773	0.00345011	no
chi-miR-34c-5p	ENSCHIT00000039584	mRNA	ENSCHIG00000025956	EMP1	epithelial membrane protein 1 [Source:NCBI gene;Acc:108636055]	-0.79021	0.00222314	0.0113699	no
chi-miR-380-3p	ENSCHIT00000028698	mRNA	ENSCHIG00000019250		ubiquitin specific peptidase 32 [Source:NCBI gene;Acc:102174242]	-0.678322	0.0153173	0.0368991	no
chi-miR-362-5p	ENSCHIT00000015311	mRNA	ENSCHIG00000010986	TRAK1	trafficking kinesin protein 1 [Source:NCBI gene;Acc:106503407]	-0.755245	0.00450843	0.0174375	no
chi-miR-154b-5p	ENSCHIT00000028593	mRNA	ENSCHIG00000019310	EPHB1	EPH receptor B1 [Source:NCBI gene;Acc:102169225]	-0.692308	0.012593	0.0322295	no
chi-miR-378-3p	ENSCHIT00000020964	mRNA	ENSCHIG00000014699	CCDC120	coiled-coil domain containing 120 [Source:NCBI gene;Acc:102183051]	-0.79021	0.00222314	0.0113699	no
chi-miR-708-3p	ENSCHIT00000029737	mRNA	ENSCHIG00000020008	ADD3	adducin 3 [Source:NCBI gene;Acc:102172687]	-0.665682	0.018132	0.0422341	no
chi-miR-34a	ENSCHIT00000040708	mRNA	ENSCHIG00000026612	CEP170	centrosomal protein 170 [Source:NCBI gene;Acc:102174769]	-0.93007	1.17e-05	0.000710365	no
chi-miR-432-5p	ENSCHIT00000010495	mRNA	ENSCHIG00000007510	CCAR2	cell cycle and apoptosis regulator 2 [Source:NCBI gene;Acc:102175019]	-0.72392	0.00776983	0.0231162	no
chi-miR-1197-3p	ENSCHIT00000033567	mRNA	ENSCHIG00000022255		SLIT-ROBO Rho GTPase activating protein 2 [Source:NCBI gene;Acc:102174862]	-0.874126	0.000200713	0.00307419	no
chi-miR-500-3p	ENSCHIT00000004787	mRNA	ENSCHIG00000003424	HMBOX1	homeobox containing 1 [Source:NCBI gene;Acc:102176882]	-0.733715	0.00660489	0.0209973	no
chi-miR-493-5p	ENSCHIT00000014310	mRNA	ENSCHIG00000010320	DGAT2	diacylglycerol O-acyltransferase 2 [Source:NCBI gene;Acc:102174409]	-0.724072	0.00775063	0.023066	no
chi-miR-532-5p	ENSCHIT00000000166	mRNA	ENSCHIG00000000114	LYST	lysosomal trafficking regulator [Source:NCBI gene;Acc:102170942]	-0.692308	0.012593	0.0322295	no
chi-miR-362-5p	ENSCHIT00000011839	mRNA	ENSCHIG00000008609	EFNA4	ephrin A4 [Source:NCBI gene;Acc:102178126]	-0.713287	0.00920178	0.0258316	no
chi-miR-141	ENSCHIT00000038972	mRNA	ENSCHIG00000025609		C1q and TNF related 3 [Source:NCBI gene;Acc:102185119]	-0.734266	0.00654349	0.0208088	no
chi-miR-34a	ENSCHIT00000036996	mRNA	ENSCHIG00000024379	RUNX3	runt related transcription factor 3 [Source:NCBI gene;Acc:102175448]	-0.685315	0.013906	0.0344654	no
chi-miR-296-3p	ENSCHIT00000029557	mRNA	ENSCHIG00000019875	MARK2	microtubule affinity regulating kinase 2 [Source:NCBI gene;Acc:102178248]	-0.832168	0.000785442	0.00623472	no
chi-miR-127-5p	ENSCHIT00000020065	mRNA	ENSCHIG00000014093	ARAP2	ArfGAP with RhoGAP domain, ankyrin repeat and PH domain 2 [Source:NCBI gene;Acc:102187662]	-0.713287	0.00920178	0.0258316	no
chi-miR-767	ENSCHIT00000031436	mRNA	ENSCHIG00000021054	DNAH5	dynein axonemal heavy chain 5 [Source:NCBI gene;Acc:102177929]	-0.711285	0.00949192	0.0265672	no
chi-miR-433	ENSCHIT00000025281	mRNA	ENSCHIG00000017127	MYH6	myosin-6 [Source:NCBI gene;Acc:106502520]	-0.923077	1.86e-05	0.000857647	no
chi-miR-500-3p	ENSCHIT00000026104	mRNA	ENSCHIG00000017596		cytoplasmic linker associated protein 2 [Source:NCBI gene;Acc:102179242]	-0.644484	0.0236773	0.0507226	no
chi-miR-1197-3p	ENSCHIT00000034038	mRNA	ENSCHIG00000022601	REPS1	RALBP1 associated Eps domain containing 1 [Source:NCBI gene;Acc:102184150]	-0.811189	0.00136331	0.00845946	no
chi-miR-27b-3p	ENSCHIT00000032312	mRNA	ENSCHIG00000021627	TMEM182	transmembrane protein 182 [Source:NCBI gene;Acc:102189406]	-0.961409	6.32e-07	0.000192914	no
chi-miR-485-5p	ENSCHIT00000027506	mRNA	ENSCHIG00000018615	GPRIN2	G protein regulated inducer of neurite outgrowth 2 [Source:NCBI gene;Acc:102174810]	-0.85114	0.000445901	0.00466832	no
chi-miR-136-5p	ENSCHIT00000036670	mRNA	ENSCHIG00000024161	KIFC3	kinesin family member C3 [Source:NCBI gene;Acc:102172378]	-0.633976	0.0268409	0.0551089	no
chi-miR-376e-5p	ENSCHIT00000020392	mRNA	ENSCHIG00000014309	CAPSL	calcyphosine like [Source:NCBI gene;Acc:102174600]	-0.734316	0.00653792	0.0208088	no
chi-miR-412-3p	ENSCHIT00000010710	mRNA	ENSCHIG00000007802			-0.699301	0.0113742	0.0299838	no
chi-miR-214-3p	ENSCHIT00000014014	mRNA	ENSCHIG00000010172	FOXI2	forkhead box I2 [Source:NCBI gene;Acc:108634016]	-0.724242	0.0077292	0.0230264	no
chi-miR-146b-3p	ENSCHIT00000008150	mRNA	ENSCHIG00000006087		septin 6 [Source:NCBI gene;Acc:102175009]	-0.839161	0.000642826	0.00565106	no
chi-miR-502b-3p	ENSCHIT00000037403	mRNA	ENSCHIG00000024616	TATDN1	TatD DNase domain containing 1 [Source:NCBI gene;Acc:102188687]	-0.762238	0.00395045	0.0162346	no
chi-miR-485-5p	ENSCHIT00000017144	mRNA	ENSCHIG00000012260	PUS3	pseudouridine synthase 3 [Source:NCBI gene;Acc:102186838]	-0.869447	0.000238925	0.00349172	no
chi-miR-493-3p	ENSCHIT00000026899	mRNA	ENSCHIG00000018190	LGR5	leucine rich repeat containing G protein-coupled receptor 5 [Source:NCBI gene;Acc:102172413]	-0.881119	0.000152674	0.00263758	no
chi-miR-493-3p	ENSCHIT00000031250	mRNA	ENSCHIG00000020957	NAA16	N(alpha)-acetyltransferase 16, NatA auxiliary subunit [Source:NCBI gene;Acc:102176337]	-0.741259	0.00580115	0.0197721	no
chi-miR-135b-5p	ENSCHIT00000030347	mRNA	ENSCHIG00000020430	TMC2	transmembrane channel like 2 [Source:NCBI gene;Acc:102173101]	-0.820709	0.00107068	0.00764767	no
chi-miR-141	ENSCHIT00000029626	mRNA	ENSCHIG00000019950	GRAMD1A	GRAM domain containing 1A [Source:NCBI gene;Acc:102189151]	-0.949213	2.44e-06	0.000329853	no
chi-miR-362-5p	ENSCHIT00000015982	mRNA	ENSCHIG00000011465		orthodenticle homeobox 2 [Source:NCBI gene;Acc:102189763]	-0.69825	0.0115515	0.0304269	no
chi-miR-143-3p	ENSCHIT00000027342	mRNA	ENSCHIG00000018501		WIZ zinc finger [Source:NCBI gene;Acc:106502280]	-0.774082	0.00312666	0.0141861	no
chi-miR-105a	ENSCHIT00000032283	mRNA	ENSCHIG00000021608	TMEM171	transmembrane protein 171 [Source:NCBI gene;Acc:102174158]	-0.762238	0.00395045	0.0162346	no
chi-miR-127-5p	ENSCHIT00000039903	mRNA	ENSCHIG00000026144	EIF2B5	eukaryotic translation initiation factor 2B subunit epsilon [Source:NCBI gene;Acc:102182730]	-0.664336	0.0184527	0.0422524	no
chi-miR-338-3p	ENSCHIT00000035269	mRNA	ENSCHIG00000023307		UDP-glucuronate decarboxylase 1 [Source:NCBI gene;Acc:102175965]	-0.594406	0.0415215	0.0747889	no
chi-miR-1306-3p	ENSCHIT00000017575	mRNA	ENSCHIG00000012534	UNC5B	unc-5 netrin receptor B [Source:NCBI gene;Acc:102184034]	-0.776224	0.00299286	0.0137075	no
chi-miR-24-3p	ENSCHIT00000032833	mRNA	ENSCHIG00000021941	SACS	sacsin molecular chaperone [Source:NCBI gene;Acc:102169306]	-0.619908	0.0315405	0.0617436	no
chi-miR-376a	ENSCHIT00000016997	mRNA	ENSCHIG00000012173	WIF1	WNT inhibitory factor 1 [Source:NCBI gene;Acc:102180191]	-0.853147	0.000418118	0.00442648	no
chi-miR-378-5p	ENSCHIT00000037934	mRNA	ENSCHIG00000024924	MCTP2	multiple C2 and transmembrane domain containing 2 [Source:NCBI gene;Acc:102172941]	-0.72028	0.00823977	0.0240034	no
chi-miR-34a	ENSCHIT00000036671	mRNA	ENSCHIG00000024172	GAS2	growth arrest specific 2 [Source:NCBI gene;Acc:102184501]	-0.958042	9.54e-07	0.000199411	no
chi-miR-23a	ENSCHIT00000017207	mRNA	ENSCHIG00000012254	STAU2	staufen double-stranded RNA binding protein 2 [Source:NCBI gene;Acc:102181057]	-0.699301	0.0113742	0.0299838	no
chi-miR-24-3p	ENSCHIT00000009719	mRNA	ENSCHIG00000007157	RTN4	reticulon 4 [Source:NCBI gene;Acc:102186405]	-0.789479	0.00225916	0.0115163	no
chi-miR-3431-5p	ENSCHIT00000018123	mRNA	ENSCHIG00000012879	WWC1	WW and C2 domain containing 1 [Source:NCBI gene;Acc:102170781]	-0.804196	0.00161477	0.00939149	no
chi-miR-504	ENSCHIT00000039448	mRNA	ENSCHIG00000025882			-0.58494	0.0457391	0.0805966	no
chi-miR-485-3p	ENSCHIT00000008021	mRNA	ENSCHIG00000005881	UBL3	ubiquitin like 3 [Source:NCBI gene;Acc:102186973]	-0.71804	0.00853932	0.024677	no
chi-miR-146b-5p	ENSCHIT00000020795	mRNA	ENSCHIG00000014575	CDH12	cadherin 12 [Source:NCBI gene;Acc:102188255]	-0.811189	0.00136331	0.00845946	no
chi-let-7g-3p	ENSCHIT00000013253	mRNA	ENSCHIG00000009623	SPINDOC	spindlin interactor and repressor of chromatin binding [Source:NCBI gene;Acc:102187461]	-0.622378	0.0306759	0.0602888	no
chi-miR-485-5p	ENSCHIT00000023502	mRNA	ENSCHIG00000016241	MARVELD2	MARVEL domain containing 2 [Source:NCBI gene;Acc:102186054]	-0.783217	0.00258622	0.0125455	no
chi-miR-143-5p	ENSCHIT00000026043	mRNA	ENSCHIG00000017755		ADP ribosylation factor like GTPase 14 effector protein like [Source:NCBI gene;Acc:102190788]	-0.706294	0.0102452	0.0279658	no
chi-miR-338-3p	ENSCHIT00000013174	mRNA	ENSCHIG00000009576	ZNF532	zinc finger protein 532 [Source:NCBI gene;Acc:102173802]	-0.692308	0.012593	0.0322295	no
chi-miR-502b-3p	ENSCHIT00000023694	mRNA	ENSCHIG00000016310	VIL1	villin 1 [Source:NCBI gene;Acc:102169060]	-0.830124	0.000831418	0.00648219	no
chi-miR-17-5p	ENSCHIT00000031168	mRNA	ENSCHIG00000020744	TNC	tenascin C [Source:NCBI gene;Acc:102179198]	-0.818182	0.0011431	0.00771266	no
chi-miR-34a	ENSCHIT00000034290	mRNA	ENSCHIG00000022748	PACS1	phosphofurin acidic cluster sorting protein 1 [Source:NCBI gene;Acc:102174194]	-0.902098	6e-05	0.00158955	no
chi-let-7b-5p	ENSCHIT00000020691	mRNA	ENSCHIG00000014389	ITGA2B	integrin subunit alpha 2b [Source:NCBI gene;Acc:102183451]	-0.818182	0.0011431	0.00771266	no
chi-miR-382-5p	ENSCHIT00000029580	mRNA	ENSCHIG00000019938	MYO5C	myosin VC [Source:NCBI gene;Acc:102168636]	-0.837129	0.000682001	0.00591167	no
chi-miR-143-3p	ENSCHIT00000029831	mRNA	ENSCHIG00000020106	DAGLA	diacylglycerol lipase alpha [Source:NCBI gene;Acc:102170586]	-0.72028	0.00823977	0.0240034	no
chi-let-7b-5p	ENSCHIT00000037838	mRNA	ENSCHIG00000024851	HK3	hexokinase 3 [Source:NCBI gene;Acc:102182403]	-0.790154	0.00222586	0.0113699	no
chi-miR-432-5p	ENSCHIT00000031619	mRNA	ENSCHIG00000021206	MYOCD	myocardin [Source:NCBI gene;Acc:102183004]	-0.846154	0.000521134	0.00507581	no
chi-miR-338-3p	ENSCHIT00000037648	mRNA	ENSCHIG00000024776	SMOC2	SPARC related modular calcium binding 2 [Source:NCBI gene;Acc:102179389]	-0.818182	0.0011431	0.00771266	no
chi-miR-296-3p	ENSCHIT00000000421	mRNA	ENSCHIG00000000282	ZMIZ1	zinc finger MIZ-type containing 1 [Source:NCBI gene;Acc:102187104]	-0.615385	0.0331699	0.0636096	no
chi-miR-329a-3p	ENSCHIT00000037245	mRNA	ENSCHIG00000024531	KRT84	keratin 84 [Source:NCBI gene;Acc:102182946]	-0.695102	0.012095	0.0316652	no
chi-miR-485-5p	ENSCHIT00000032126	mRNA	ENSCHIG00000021520	CRTAC1	cartilage acidic protein 1 [Source:NCBI gene;Acc:102175738]	-0.713287	0.00920178	0.0258316	no
chi-miR-493-3p	ENSCHIT00000024379	mRNA	ENSCHIG00000016585		myosin VB [Source:NCBI gene;Acc:102168225]	-0.654992	0.0207937	0.0460228	no
chi-miR-128-3p	ENSCHIT00000020097	mRNA	ENSCHIG00000014104			-0.661998	0.0190195	0.0433702	no
chi-miR-493-3p	ENSCHIT00000024370	mRNA	ENSCHIG00000016585		myosin VB [Source:NCBI gene;Acc:102168225]	-0.65035	0.0220342	0.0476499	no
chi-miR-141	ENSCHIT00000028377	mRNA	ENSCHIG00000019062	COL12A1	collagen type XII alpha 1 chain [Source:NCBI gene;Acc:102188405]	-0.839161	0.000642826	0.00565106	no
chi-miR-410-5p	ENSCHIT00000002651	mRNA	ENSCHIG00000001852	OCLN	occludin [Source:NCBI gene;Acc:102185782]	-0.888112	0.000114134	0.00224534	no
chi-miR-485-3p	ENSCHIT00000032046	mRNA	ENSCHIG00000021478	SNX10	sorting nexin 10 [Source:NCBI gene;Acc:102171299]	-0.727273	0.00735503	0.0224232	no
chi-miR-338-3p	ENSCHIT00000018107	mRNA	ENSCHIG00000012870	ANKS6	ankyrin repeat and sterile alpha motif domain containing 6 [Source:NCBI gene;Acc:102186960]	-0.811189	0.00136331	0.00845946	no
chi-miR-141	ENSCHIT00000039376	mRNA	ENSCHIG00000025837	MRAS	muscle RAS oncogene homolog [Source:NCBI gene;Acc:102185873]	-0.65035	0.0220342	0.0476499	no
chi-let-7b-5p	ENSCHIT00000014657	mRNA	ENSCHIG00000010599	GAL3ST1	galactose-3-O-sulfotransferase 1 [Source:NCBI gene;Acc:102169694]	-0.65035	0.0220342	0.0476499	no
chi-miR-146b-3p	ENSCHIT00000009719	mRNA	ENSCHIG00000007157	RTN4	reticulon 4 [Source:NCBI gene;Acc:102186405]	-0.835093	0.000723093	0.00623472	no
chi-miR-23b-3p	ENSCHIT00000033852	mRNA	ENSCHIG00000022500	PLEKHA5	pleckstrin homology domain containing A5 [Source:NCBI gene;Acc:102169565]	-0.7466	0.00527832	0.0187575	no
chi-miR-29c-5p	ENSCHIT00000041551	mRNA	ENSCHIG00000027125	TNS3	tensin 3 [Source:NCBI gene;Acc:102180104]	-0.58042	0.047856	0.0829136	no
chi-miR-378-5p	ENSCHIT00000036685	mRNA	ENSCHIG00000024185	FABP7	fatty acid binding protein 7 [Source:NCBI gene;Acc:102187769]	-0.776224	0.00299286	0.0137075	no
chi-miR-145-3p	ENSCHIT00000033982	mRNA	ENSCHIG00000022545	PLCD4	phospholipase C delta 4 [Source:NCBI gene;Acc:102169343]	-0.741259	0.00580115	0.0197721	no
chi-miR-27b-3p	ENSCHIT00000025647	mRNA	ENSCHIG00000017516	LIMD1	LIM domains containing 1 [Source:NCBI gene;Acc:102186726]	-0.916084	2.84e-05	0.00111082	no
chi-miR-1306-3p	ENSCHIT00000012659	mRNA	ENSCHIG00000009047	CUX1	cut like homeobox 1 [Source:NCBI gene;Acc:102185705]	-0.679242	0.0151258	0.0368991	no
chi-miR-143-3p	ENSCHIT00000020512	mRNA	ENSCHIG00000014379	KLHL40	kelch like family member 40 [Source:NCBI gene;Acc:102180163]	-0.737663	0.00617447	0.020777	no
chi-miR-758	ENSCHIT00000019131	mRNA	ENSCHIG00000013509	FAM135A	family with sequence similarity 135 member A [Source:NCBI gene;Acc:102181221]	-0.706294	0.0102452	0.0279658	no
chi-miR-1185-5p	ENSCHIT00000021836	mRNA	ENSCHIG00000015223	GSDMA	gasdermin A [Source:NCBI gene;Acc:102185306]	-0.585976	0.0452632	0.0798633	no
chi-miR-154a-3p	ENSCHIT00000008880	mRNA	ENSCHIG00000005571	ITGB4	integrin subunit beta 4 [Source:NCBI gene;Acc:102191175]	-0.951049	2.04e-06	0.000293208	no
chi-miR-338-3p	ENSCHIT00000025119	mRNA	ENSCHIG00000017221	TMEM266	transmembrane protein 266 [Source:NCBI gene;Acc:102188804]	-0.739455	0.00598623	0.0202327	no
chi-miR-29a-3p	ENSCHIT00000038506	mRNA	ENSCHIG00000025325	TRH	thyrotropin releasing hormone [Source:NCBI gene;Acc:108633383]	-0.916084	2.84e-05	0.00111082	no
chi-miR-412-3p	ENSCHIT00000023918	mRNA	ENSCHIG00000016493	COL8A1	collagen type VIII alpha 1 chain [Source:NCBI gene;Acc:102175894]	-0.608392	0.035806	0.0671753	no
chi-miR-335-5p	ENSCHIT00000028346	mRNA	ENSCHIG00000019030	SLC15A1	solute carrier family 15 member 1 [Source:NCBI gene;Acc:102175866]	-0.650444	0.0220086	0.0476499	no
chi-miR-335-5p	ENSCHIT00000028341	mRNA	ENSCHIG00000019030	SLC15A1	solute carrier family 15 member 1 [Source:NCBI gene;Acc:102175866]	-0.734316	0.00653792	0.0208088	no
chi-miR-412-3p	ENSCHIT00000036140	mRNA	ENSCHIG00000023852	ZNF618	zinc finger protein 618 [Source:NCBI gene;Acc:102175404]	-0.872024	0.000217238	0.00323009	no
chi-miR-145-5p	ENSCHIT00000023963	mRNA	ENSCHIG00000016498	DISP1	dispatched RND transporter family member 1 [Source:NCBI gene;Acc:102182522]	-0.65035	0.0220342	0.0476499	no
chi-miR-378-3p	ENSCHIT00000032721	mRNA	ENSCHIG00000021817	PLB1	phospholipase B1 [Source:NCBI gene;Acc:102171250]	-0.79372	0.00205628	0.0109812	no
chi-miR-3431-5p	ENSCHIT00000016774	mRNA	ENSCHIG00000012025		AHNAK nucleoprotein 2 [Source:NCBI gene;Acc:102188806]	-0.818182	0.0011431	0.00771266	no
chi-miR-200b	ENSCHIT00000014190	mRNA	ENSCHIG00000010227		piezo type mechanosensitive ion channel component 2 [Source:NCBI gene;Acc:102178229]	-0.909091	4.19e-05	0.00132895	no
chi-miR-502b-3p	ENSCHIT00000036438	mRNA	ENSCHIG00000023984	ECE1	endothelin converting enzyme 1 [Source:NCBI gene;Acc:102189723]	-0.846154	0.000521134	0.00507581	no
chi-miR-378-5p	ENSCHIT00000026460	mRNA	ENSCHIG00000017963	FGFR2	fibroblast growth factor receptor 2 [Source:NCBI gene;Acc:102170938]	-0.818182	0.0011431	0.00771266	no
chi-miR-29c-3p	ENSCHIT00000037043	mRNA	ENSCHIG00000024367	NBEA	neurobeachin [Source:NCBI gene;Acc:102186605]	-0.776224	0.00299286	0.0137075	no
chi-miR-214-3p	ENSCHIT00000000119	mRNA	ENSCHIG00000000088			-0.734316	0.00653792	0.0208088	no
chi-miR-432-5p	ENSCHIT00000000735	mRNA	ENSCHIG00000000501	KCNH5	potassium voltage-gated channel subfamily H member 5 [Source:NCBI gene;Acc:102181871]	-0.800737	0.00175159	0.0100026	no
chi-miR-483	ENSCHIT00000020737	mRNA	ENSCHIG00000014338	EPB41	erythrocyte membrane protein band 4.1 [Source:NCBI gene;Acc:102176373]	-0.706294	0.0102452	0.0279658	no
chi-miR-188-5p	ENSCHIT00000012734	mRNA	ENSCHIG00000009239	CYP24A1	1,25-dihydroxyvitamin D(3) 24-hydroxylase, mitochondrial [Source:NCBI gene;Acc:102178921]	-0.859654	0.000337176	0.00399102	no
chi-miR-24-3p	ENSCHIT00000020841	mRNA	ENSCHIG00000014618	PCDH10	protocadherin 10 [Source:NCBI gene;Acc:102177648]	-0.637479	0.0257544	0.0536812	no
chi-miR-3431-5p	ENSCHIT00000026607	mRNA	ENSCHIG00000018069	FCHO1	FCH domain only 1 [Source:NCBI gene;Acc:102172052]	-0.819616	0.00110155	0.00771266	no
chi-miR-145-5p	ENSCHIT00000032859	mRNA	ENSCHIG00000021955	RIPOR3	RIPOR family member 3 [Source:NCBI gene;Acc:102173762]	-0.601399	0.0385885	0.0708848	no
chi-miR-193b-3p	ENSCHIT00000030795	mRNA	ENSCHIG00000020707	EHD1	EH domain containing 1 [Source:NCBI gene;Acc:102169361]	-0.923077	1.86e-05	0.000857647	no
chi-miR-329b-3p	ENSCHIT00000029614	mRNA	ENSCHIG00000019917	TRPM6	transient receptor potential cation channel subfamily M member 6 [Source:NCBI gene;Acc:102185359]	-0.699301	0.0113742	0.0299838	no
chi-miR-141	ENSCHIT00000013993	mRNA	ENSCHIG00000010153	GDF10	growth differentiation factor 10 [Source:NCBI gene;Acc:102178514]	-0.874126	0.000200713	0.00307419	no
chi-miR-3431-5p	ENSCHIT00000035931	mRNA	ENSCHIG00000023685	PATJ	PATJ, crumbs cell polarity complex component [Source:NCBI gene;Acc:102188460]	-0.72028	0.00823977	0.0240034	no
chi-miR-378-5p	ENSCHIT00000024084	mRNA	ENSCHIG00000016561	PDPR	pyruvate dehydrogenase phosphatase regulatory subunit, mitochondrial [Source:NCBI gene;Acc:106503078]	-0.812127	0.00133201	0.00845946	no
chi-miR-135a	ENSCHIT00000000714	mRNA	ENSCHIG00000000478	WWC3	WWC family member 3 [Source:NCBI gene;Acc:102178160]	-0.699301	0.0113742	0.0299838	no
chi-miR-105b-5p	ENSCHIT00000032799	mRNA	ENSCHIG00000021906	ANKRD13A	ankyrin repeat domain 13A [Source:NCBI gene;Acc:102180615]	-0.713287	0.00920178	0.0258316	no
chi-miR-24-3p	ENSCHIT00000027291	mRNA	ENSCHIG00000018472			-0.884216	0.000134521	0.00257497	no
chi-miR-493-3p	ENSCHIT00000038480	mRNA	ENSCHIG00000025298	RIN1	Ras and Rab interactor 1 [Source:NCBI gene;Acc:102177964]	-0.986014	4.12e-09	9.32e-06	no
chi-miR-378-5p	ENSCHIT00000010175	mRNA	ENSCHIG00000007476	RHOH	ras homolog family member H [Source:NCBI gene;Acc:102174643]	-0.767625	0.00355762	0.0154189	no
chi-miR-429	ENSCHIT00000017306	mRNA	ENSCHIG00000012255	NAV3	neuron navigator 3 [Source:NCBI gene;Acc:102182566]	-0.867133	0.000259812	0.00349172	no
chi-miR-708-5p	ENSCHIT00000039994	mRNA	ENSCHIG00000026212	SNX21	sorting nexin family member 21 [Source:NCBI gene;Acc:102190973]	-0.629371	0.0283197	0.0569031	no
chi-miR-378-5p	ENSCHIT00000020259	mRNA	ENSCHIG00000014208	PRPF4B	pre-mRNA processing factor 4B [Source:NCBI gene;Acc:102170839]	-0.741259	0.00580115	0.0197721	no
chi-miR-708-3p	ENSCHIT00000023013	mRNA	ENSCHIG00000015898	ALPK3	alpha kinase 3 [Source:NCBI gene;Acc:102188535]	-0.944056	3.93e-06	0.000389781	no
chi-miR-410-5p	ENSCHIT00000026356	mRNA	ENSCHIG00000017925	SNX16	sorting nexin 16 [Source:NCBI gene;Acc:102174761]	-0.692308	0.012593	0.0322295	no
chi-miR-34c-5p	ENSCHIT00000015920	mRNA	ENSCHIG00000011339	SPTA1	spectrin alpha, erythrocytic 1 [Source:NCBI gene;Acc:102173984]	-0.727273	0.00735503	0.0224232	no
chi-miR-378-3p	ENSCHIT00000011579	mRNA	ENSCHIG00000008233	FAT2	FAT atypical cadherin 2 [Source:NCBI gene;Acc:102191697]	-0.699301	0.0113742	0.0299838	no
chi-miR-369-5p	ENSCHIT00000019983	mRNA	ENSCHIG00000014004	SIDT2	SID1 transmembrane family member 2 [Source:NCBI gene;Acc:102185674]	-0.594406	0.0415215	0.0747889	no
chi-miR-493-3p	ENSCHIT00000022934	mRNA	ENSCHIG00000015756	ACTN1	actinin alpha 1 [Source:NCBI gene;Acc:102176966]	-0.776224	0.00299286	0.0137075	no
chi-miR-150	ENSCHIT00000015240	mRNA	ENSCHIG00000010966	RCN3	reticulocalbin 3 [Source:NCBI gene;Acc:102171002]	-0.832168	0.000785442	0.00623472	no
chi-miR-128-3p	ENSCHIT00000018154	mRNA	ENSCHIG00000012922	DUSP5	dual specificity phosphatase 5 [Source:NCBI gene;Acc:102186181]	-0.587413	0.0446093	0.0788368	no
chi-miR-34a	ENSCHIT00000037226	mRNA	ENSCHIG00000024522			-0.671329	0.0168315	0.0396093	no
chi-miR-432-3p	ENSCHIT00000027506	mRNA	ENSCHIG00000018615	GPRIN2	G protein regulated inducer of neurite outgrowth 2 [Source:NCBI gene;Acc:102174810]	-0.707532	0.0100544	0.027921	no
chi-let-7g-3p	ENSCHIT00000015579	mRNA	ENSCHIG00000011185	TENM3	teneurin transmembrane protein 3 [Source:NCBI gene;Acc:102185807]	-0.678322	0.0153173	0.0368991	no
chi-miR-145-5p	ENSCHIT00000035936	mRNA	ENSCHIG00000023740	LBX1	ladybird homeobox 1 [Source:NCBI gene;Acc:102178695]	-0.600446	0.0389791	0.071523	no
chi-miR-214-3p	ENSCHIT00000012770	mRNA	ENSCHIG00000009277		exocyst complex component 3 like 2 [Source:NCBI gene;Acc:102187257]	-0.881119	0.000152674	0.00263758	no
chi-miR-504	ENSCHIT00000023466	mRNA	ENSCHIG00000016225	KIAA0930	KIAA0930 ortholog [Source:NCBI gene;Acc:102175102]	-0.678322	0.0153173	0.0368991	no
chi-miR-200a	ENSCHIT00000032847	mRNA	ENSCHIG00000021942	FOXJ3	forkhead box J3 [Source:NCBI gene;Acc:102180006]	-0.811189	0.00136331	0.00845946	no
chi-miR-143-3p	ENSCHIT00000007943	mRNA	ENSCHIG00000005911	EPC1	enhancer of polycomb homolog 1 [Source:NCBI gene;Acc:102183613]	-0.594406	0.0415215	0.0747889	no
chi-miR-145-5p	ENSCHIT00000022357	mRNA	ENSCHIG00000015557	KREMEN2	kringle containing transmembrane protein 2 [Source:NCBI gene;Acc:102175918]	-0.601399	0.0385885	0.0708848	no
chi-let-7b-5p	ENSCHIT00000036264	mRNA	ENSCHIG00000023908	EPB41L3	erythrocyte membrane protein band 4.1 like 3 [Source:NCBI gene;Acc:102172400]	-0.902098	6e-05	0.00158955	no
chi-miR-188-5p	ENSCHIT00000027562	mRNA	ENSCHIG00000018648	SP2	Sp2 transcription factor [Source:NCBI gene;Acc:102171546]	-0.683017	0.0143587	0.0354035	no
chi-miR-378-3p	ENSCHIT00000018833	mRNA	ENSCHIG00000013332	AMPD3	adenosine monophosphate deaminase 3 [Source:NCBI gene;Acc:102176807]	-0.873204	0.000207835	0.00311596	no
chi-miR-502b-3p	ENSCHIT00000035502	mRNA	ENSCHIG00000023450	NOP56	NOP56 ribonucleoprotein [Source:NCBI gene;Acc:102187413]	-0.811189	0.00136331	0.00845946	no
chi-miR-497-5p	ENSCHIT00000031175	mRNA	ENSCHIG00000020935	SLC35F1	solute carrier family 35 member F1 [Source:NCBI gene;Acc:102170424]	-0.669003	0.0173586	0.0406091	no
chi-miR-409-5p	ENSCHIT00000011550	mRNA	ENSCHIG00000008373	DCT	dopachrome tautomerase [Source:NCBI gene;Acc:102169882]	-0.819616	0.00110155	0.00771266	no
chi-let-7b-5p	ENSCHIT00000024998	mRNA	ENSCHIG00000017123	ZFHX4	zinc finger homeobox 4 [Source:NCBI gene;Acc:102180407]	-0.944056	3.93e-06	0.000389781	no
chi-miR-3955-3p	ENSCHIT00000024302	mRNA	ENSCHIG00000016706	MALT1	MALT1 paracaspase [Source:NCBI gene;Acc:102173520]	-0.685315	0.013906	0.0344654	no
chi-miR-145-5p	ENSCHIT00000027804	mRNA	ENSCHIG00000018784	GALNT1	polypeptide N-acetylgalactosaminyltransferase 1 [Source:NCBI gene;Acc:102174078]	-0.727273	0.00735503	0.0224232	no
chi-miR-1197-3p	ENSCHIT00000024398	mRNA	ENSCHIG00000016794	SRSF5	serine and arginine rich splicing factor 5 [Source:NCBI gene;Acc:102176537]	-0.909091	4.19e-05	0.00132895	no
chi-miR-27b-3p	ENSCHIT00000032847	mRNA	ENSCHIG00000021942	FOXJ3	forkhead box J3 [Source:NCBI gene;Acc:102180006]	-0.72028	0.00823977	0.0240034	no
chi-miR-543-5p	ENSCHIT00000028525	mRNA	ENSCHIG00000019178	CDC42BPG	CDC42 binding protein kinase gamma [Source:NCBI gene;Acc:102169079]	-0.608392	0.035806	0.0671753	no
chi-miR-145-5p	ENSCHIT00000035580	mRNA	ENSCHIG00000023523	NCAN	neurocan [Source:NCBI gene;Acc:102188301]	-0.826621	0.000915011	0.00690982	no
chi-miR-378-3p	ENSCHIT00000023559	mRNA	ENSCHIG00000016192	GOLGA4	golgin A4 [Source:NCBI gene;Acc:102182919]	-0.741259	0.00580115	0.0197721	no
chi-miR-485-5p	ENSCHIT00000025602	mRNA	ENSCHIG00000017479	FNIP2	folliculin interacting protein 2 [Source:NCBI gene;Acc:102188244]	-0.678322	0.0153173	0.0368991	no
chi-miR-500-5p	ENSCHIT00000009298	mRNA	ENSCHIG00000006913	VSNL1	visinin like 1 [Source:NCBI gene;Acc:102179016]	-0.65035	0.0220342	0.0476499	no
chi-miR-34a	ENSCHIT00000014767	mRNA	ENSCHIG00000010683	ARSG	arylsulfatase G [Source:NCBI gene;Acc:102179519]	-0.748252	0.00512408	0.0182641	no
chi-miR-143-3p	ENSCHIT00000020092	mRNA	ENSCHIG00000014066	MED12L	mediator complex subunit 12 like [Source:NCBI gene;Acc:102181438]	-0.755245	0.00450843	0.0174375	no
chi-miR-497-5p	ENSCHIT00000022246	mRNA	ENSCHIG00000015468	TMEM132E	transmembrane protein 132E [Source:NCBI gene;Acc:102186337]	-0.797203	0.00190037	0.0103462	no
chi-miR-497-5p	ENSCHIT00000017972	mRNA	ENSCHIG00000012799	PHF7	PHD finger protein 7 [Source:NCBI gene;Acc:102183192]	-0.615385	0.0331699	0.0636096	no
chi-miR-1185-5p	ENSCHIT00000038052	mRNA	ENSCHIG00000025038	GATA3	GATA binding protein 3 [Source:NCBI gene;Acc:102172821]	-0.853147	0.000418118	0.00442648	no
chi-miR-27a-3p	ENSCHIT00000028411	mRNA	ENSCHIG00000019098	MEGF6	multiple EGF like domains 6 [Source:HGNC Symbol;Acc:HGNC:3232]	-0.678322	0.0153173	0.0368991	no
chi-miR-127-5p	ENSCHIT00000029242	mRNA	ENSCHIG00000019728	PIK3CB	phosphatidylinositol-4,5-bisphosphate 3-kinase catalytic subunit beta [Source:NCBI gene;Acc:102185042]	-0.867133	0.000259812	0.00349172	no
chi-miR-380-5p	ENSCHIT00000002530	mRNA	ENSCHIG00000001779	ABCC11	ATP binding cassette subfamily C member 11 [Source:NCBI gene;Acc:102175509]	-0.865578	0.000274627	0.00361735	no
chi-let-7b-5p	ENSCHIT00000032468	mRNA	ENSCHIG00000021724	ADAMTS15	ADAM metallopeptidase with thrombospondin type 1 motif 15 [Source:NCBI gene;Acc:102187842]	-0.937063	6.99e-06	0.000521858	no
chi-miR-214-3p	ENSCHIT00000005225	mRNA	ENSCHIG00000003875	PCDH7	protocadherin 7 [Source:NCBI gene;Acc:102186849]	-0.762238	0.00395045	0.0162346	no
chi-miR-504	ENSCHIT00000039795	mRNA	ENSCHIG00000026096	FITM2	fat storage inducing transmembrane protein 2 [Source:NCBI gene;Acc:102169491]	-0.902098	6e-05	0.00158955	no
chi-miR-335-3p	ENSCHIT00000040138	mRNA	ENSCHIG00000026297	NECTIN1	nectin cell adhesion molecule 1 [Source:NCBI gene;Acc:102186231]	-0.706294	0.0102452	0.0279658	no
chi-miR-154b-3p	ENSCHIT00000022320	mRNA	ENSCHIG00000015540		interferon regulatory factor 6 [Source:NCBI gene;Acc:102190443]	-0.867133	0.000259812	0.00349172	no
chi-miR-127-5p	ENSCHIT00000036526	mRNA	ENSCHIG00000024087	ANXA9	annexin A9 [Source:NCBI gene;Acc:102180552]	-0.819616	0.00110155	0.00771266	no
chi-miR-34c-5p	ENSCHIT00000038024	mRNA	ENSCHIG00000025031		docosahexaenoic acid omega-hydroxylase CYP4F3-like [Source:NCBI gene;Acc:102181858]	-0.602611	0.0380952	0.0708848	no
chi-miR-296-3p	ENSCHIT00000016412	mRNA	ENSCHIG00000011729	CHD7	chromodomain helicase DNA binding protein 7 [Source:NCBI gene;Acc:102188956]	-0.594406	0.0415215	0.0747889	no
chi-miR-502b-3p	ENSCHIT00000016413	mRNA	ENSCHIG00000011771	HOXD10	homeobox D10 [Source:NCBI gene;Acc:102179053]	-0.881119	0.000152674	0.00263758	no
chi-miR-502b-3p	ENSCHIT00000016415	mRNA	ENSCHIG00000011770	PPL	periplakin [Source:NCBI gene;Acc:102168596]	-0.706294	0.0102452	0.0279658	no
chi-miR-502b-3p	ENSCHIT00000023902	mRNA	ENSCHIG00000016387	NUP98	nucleoporin 98 [Source:NCBI gene;Acc:102191442]	-0.755245	0.00450843	0.0174375	no
chi-miR-493-3p	ENSCHIT00000026689	mRNA	ENSCHIG00000018052		arachidonate 12-lipoxygenase, epidermal-type [Source:NCBI gene;Acc:102178853]	-0.624169	0.0300595	0.0599801	no
chi-miR-154b-3p	ENSCHIT00000038753	mRNA	ENSCHIG00000025456	CASS4	Cas scaffold protein family member 4 [Source:NCBI gene;Acc:102170531]	-0.734316	0.00653792	0.0208088	no
chi-miR-377	ENSCHIT00000024780	mRNA	ENSCHIG00000017019	CANT1	calcium activated nucleotidase 1 [Source:NCBI gene;Acc:102177094]	-0.655032	0.0207834	0.0460228	no
chi-miR-665	ENSCHIT00000031321	mRNA	ENSCHIG00000021009	TXNRD1	thioredoxin reductase 1 [Source:NCBI gene;Acc:102182855]	-0.753931	0.0046196	0.0174375	no
chi-miR-24-3p	ENSCHIT00000040167	mRNA	ENSCHIG00000026311	CRB2	crumbs cell polarity complex component 2 [Source:NCBI gene;Acc:102185094]	-0.830435	0.000824281	0.00647999	no
chi-miR-412-3p	ENSCHIT00000021741	mRNA	ENSCHIG00000015160	TGM5	transglutaminase 5 [Source:NCBI gene;Acc:102179888]	-0.682315	0.014499	0.03573	no
chi-miR-214-3p	ENSCHIT00000016100	mRNA	ENSCHIG00000011546	PIPOX	pipecolic acid and sarcosine oxidase [Source:NCBI gene;Acc:102169216]	-0.651425	0.0217423	0.0476499	no
chi-miR-211	ENSCHIT00000012117	mRNA	ENSCHIG00000008805	CTSV	cathepsin V [Source:NCBI gene;Acc:102190225]	-0.840632	0.000615569	0.00565106	no
chi-miR-497-5p	ENSCHIT00000040080	mRNA	ENSCHIG00000026263	FMOD	fibromodulin [Source:NCBI gene;Acc:102183621]	-0.818182	0.0011431	0.00771266	no
chi-miR-214-3p	ENSCHIT00000003362	mRNA	ENSCHIG00000002435	TUBA4A	tubulin alpha-4A chain [Source:NCBI gene;Acc:102177846]	-0.846154	0.000521134	0.00507581	no
chi-miR-502b-3p	ENSCHIT00000005382	mRNA	ENSCHIG00000003901	GJA1	gap junction protein alpha 1 [Source:NCBI gene;Acc:102191242]	-0.825175	0.000951363	0.00690982	no
chi-miR-502b-3p	ENSCHIT00000028396	mRNA	ENSCHIG00000019160	CCDC50	coiled-coil domain containing 50 [Source:NCBI gene;Acc:102178015]	-0.699301	0.0113742	0.0299838	no
chi-miR-362-5p	ENSCHIT00000033600	mRNA	ENSCHIG00000022376	SATB2	SATB homeobox 2 [Source:NCBI gene;Acc:102171018]	-0.709143	0.00980999	0.0273418	no
chi-miR-200a	ENSCHIT00000028377	mRNA	ENSCHIG00000019062	COL12A1	collagen type XII alpha 1 chain [Source:NCBI gene;Acc:102188405]	-0.853147	0.000418118	0.00442648	no
chi-miR-195-3p	ENSCHIT00000028384	mRNA	ENSCHIG00000019165	KCNH6	potassium voltage-gated channel subfamily H member 6 [Source:NCBI gene;Acc:102172195]	-0.826621	0.000915011	0.00690982	no
chi-let-7g-3p	ENSCHIT00000016079	mRNA	ENSCHIG00000011255	PYGM	glycogen phosphorylase, muscle associated [Source:NCBI gene;Acc:102183771]	-0.734266	0.00654349	0.0208088	no
chi-miR-24-3p	ENSCHIT00000035603	mRNA	ENSCHIG00000023535	LRRTM3	leucine rich repeat transmembrane neuronal 3 [Source:NCBI gene;Acc:102179546]	-0.654992	0.0207937	0.0460228	no
chi-miR-24-3p	ENSCHIT00000022721	mRNA	ENSCHIG00000015726	CD163	scavenger receptor cysteine-rich type 1 protein M130 [Source:NCBI gene;Acc:102183943]	-0.694912	0.0121283	0.0317482	no
chi-miR-502b-3p	ENSCHIT00000014023	mRNA	ENSCHIG00000010175	PADI3	peptidyl arginine deiminase 3 [Source:NCBI gene;Acc:102171827]	-0.854642	0.000398308	0.00442648	no
chi-miR-34a	ENSCHIT00000019739	mRNA	ENSCHIG00000013918	TMEM8B	transmembrane protein 8B [Source:NCBI gene;Acc:102182129]	-0.937063	6.99e-06	0.000521858	no
chi-miR-432-3p	ENSCHIT00000023711	mRNA	ENSCHIG00000016389			-0.612961	0.0340673	0.0651041	no
chi-miR-100-3p	ENSCHIT00000035763	mRNA	ENSCHIG00000023633	HSPA4L	heat shock protein family A (Hsp70) member 4 like [Source:NCBI gene;Acc:102176065]	-0.594406	0.0415215	0.0747889	no
chi-miR-105b-5p	ENSCHIT00000023559	mRNA	ENSCHIG00000016192	GOLGA4	golgin A4 [Source:NCBI gene;Acc:102182919]	-0.741259	0.00580115	0.0197721	no
chi-miR-383	ENSCHIT00000029821	mRNA	ENSCHIG00000020107	GPRC5D	G protein-coupled receptor class C group 5 member D [Source:NCBI gene;Acc:102174097]	-0.633976	0.0268409	0.0551089	no
chi-let-7b-5p	ENSCHIT00000011487	mRNA	ENSCHIG00000008347	CAPN6	calpain 6 [Source:NCBI gene;Acc:102183942]	-0.902098	6e-05	0.00158955	no
chi-miR-105b-5p	ENSCHIT00000037981	mRNA	ENSCHIG00000024988	PLEKHN1	pleckstrin homology domain containing N1 [Source:NCBI gene;Acc:102171536]	-0.735553	0.00640179	0.0208088	no
chi-miR-338-3p	ENSCHIT00000040011	mRNA	ENSCHIG00000025774	DST	dystonin [Source:NCBI gene;Acc:106503471]	-0.783217	0.00258622	0.0125455	no
chi-miR-214-3p	ENSCHIT00000040049	mRNA	ENSCHIG00000026243	KCNK17	potassium two pore domain channel subfamily K member 17 [Source:NCBI gene;Acc:102185792]	-0.671329	0.0168315	0.0396093	no
chi-miR-412-5p	ENSCHIT00000001772	mRNA	ENSCHIG00000001265	ABHD13	abhydrolase domain containing 13 [Source:NCBI gene;Acc:102183248]	-0.713287	0.00920178	0.0258316	no
chi-miR-500-3p	ENSCHIT00000027400	mRNA	ENSCHIG00000018547	ANKRD35	ankyrin repeat domain 35 [Source:NCBI gene;Acc:102186360]	-0.839161	0.000642826	0.00565106	no
chi-miR-127-5p	ENSCHIT00000024037	mRNA	ENSCHIG00000016560		T-cell surface glycoprotein CD1a-like [Source:NCBI gene;Acc:102179999]	-0.761369	0.00401672	0.0163318	no
chi-miR-485-5p	ENSCHIT00000041163	mRNA	ENSCHIG00000026909		cationic amino acid transporter 3-like [Source:NCBI gene;Acc:108634642]	-0.650444	0.0220086	0.0476499	no
chi-miR-105b-5p	ENSCHIT00000041691	mRNA	ENSCHIG00000027207	MEIS1	Meis homeobox 1 [Source:NCBI gene;Acc:102181046]	-0.650444	0.0220086	0.0476499	no
chi-miR-432-3p	ENSCHIT00000020348	mRNA	ENSCHIG00000014259	GALE	UDP-galactose-4-epimerase [Source:NCBI gene;Acc:102181448]	-0.622378	0.0306759	0.0602888	no
chi-miR-767	ENSCHIT00000030734	mRNA	ENSCHIG00000020615	ACACB	acetyl-CoA carboxylase beta [Source:NCBI gene;Acc:102178200]	-0.67018	0.0170904	0.040171	no
chi-miR-378-3p	ENSCHIT00000032744	mRNA	ENSCHIG00000021840	PLEKHA6	pleckstrin homology domain containing A6 [Source:NCBI gene;Acc:102179968]	-0.686524	0.013672	0.0344654	no
chi-miR-378-3p	ENSCHIT00000032741	mRNA	ENSCHIG00000021817	PLB1	phospholipase B1 [Source:NCBI gene;Acc:102171250]	-0.576458	0.0497673	0.0856272	no
chi-miR-93-5p	ENSCHIT00000036240	mRNA	ENSCHIG00000023924	LMOD2	leiomodin 2 [Source:NCBI gene;Acc:102191762]	-0.622378	0.0306759	0.0602888	no
chi-miR-154b-5p	ENSCHIT00000011579	mRNA	ENSCHIG00000008233	FAT2	FAT atypical cadherin 2 [Source:NCBI gene;Acc:102191697]	-0.783217	0.00258622	0.0125455	no
chi-miR-146b-3p	ENSCHIT00000022127	mRNA	ENSCHIG00000015418	ZNF444	zinc finger protein 444 [Source:NCBI gene;Acc:108638126]	-0.715794	0.00884773	0.0254385	no
chi-miR-145-5p	ENSCHIT00000032871	mRNA	ENSCHIG00000021955	RIPOR3	RIPOR family member 3 [Source:NCBI gene;Acc:102173762]	-0.658495	0.0198921	0.0449851	no
chi-miR-17-5p	ENSCHIT00000025445	mRNA	ENSCHIG00000017325	PTPRD	protein tyrosine phosphatase, receptor type D [Source:NCBI gene;Acc:102174567]	-0.839161	0.000642826	0.00565106	no
chi-miR-382-5p	ENSCHIT00000030473	mRNA	ENSCHIG00000020509	ATP6V1A	ATPase H+ transporting V1 subunit A [Source:NCBI gene;Acc:102186053]	-0.783217	0.00258622	0.0125455	no
chi-miR-296-3p	ENSCHIT00000036839	mRNA	ENSCHIG00000024280	LRRC32	leucine rich repeat containing 32 [Source:NCBI gene;Acc:102176712]	-0.79021	0.00222314	0.0113699	no
chi-miR-485-5p	ENSCHIT00000024780	mRNA	ENSCHIG00000017019	CANT1	calcium activated nucleotidase 1 [Source:NCBI gene;Acc:102177094]	-0.70182	0.0109574	0.0296367	no
chi-miR-493-3p	ENSCHIT00000035034	mRNA	ENSCHIG00000023205	MTCL1	microtubule crosslinking factor 1 [Source:NCBI gene;Acc:102176574]	-0.846154	0.000521134	0.00507581	no
chi-miR-758	ENSCHIT00000031857	mRNA	ENSCHIG00000021287		NPC intracellular cholesterol transporter 1 [Source:NCBI gene;Acc:102189363]	-0.762238	0.00395045	0.0162346	no
chi-miR-376e-5p	ENSCHIT00000028741	mRNA	ENSCHIG00000019371	ABCA12	ATP binding cassette subfamily A member 12 [Source:NCBI gene;Acc:102174076]	-0.700526	0.0111699	0.0299838	no
chi-miR-502b-3p	ENSCHIT00000028593	mRNA	ENSCHIG00000019310	EPHB1	EPH receptor B1 [Source:NCBI gene;Acc:102169225]	-0.706294	0.0102452	0.0279658	no
chi-miR-432-5p	ENSCHIT00000038682	mRNA	ENSCHIG00000025392	EPB41L1	erythrocyte membrane protein band 4.1 like 1 [Source:NCBI gene;Acc:102177452]	-0.923077	1.86e-05	0.000857647	no
chi-miR-411a-3p	ENSCHIT00000019301	mRNA	ENSCHIG00000013642	USP53	ubiquitin specific peptidase 53 [Source:NCBI gene;Acc:102190320]	-0.629371	0.0283197	0.0569031	no
chi-miR-543-5p	ENSCHIT00000039896	mRNA	ENSCHIG00000026152	TMPRSS11E	transmembrane protease serine 11E [Source:NCBI gene;Acc:102186288]	-0.715599	0.00887488	0.0255043	no
chi-miR-433	ENSCHIT00000031148	mRNA	ENSCHIG00000020653	SORL1	sortilin related receptor 1 [Source:NCBI gene;Acc:102187336]	-0.909091	4.19e-05	0.00132895	no
chi-miR-27a-3p	ENSCHIT00000013858	mRNA	ENSCHIG00000010000	ANPEP	alanyl aminopeptidase, membrane [Source:NCBI gene;Acc:102185784]	-0.636364	0.0260969	0.0536812	no
chi-miR-497-5p	ENSCHIT00000039751	mRNA	ENSCHIG00000026059		aldehyde dehydrogenase 3 family member B1 [Source:NCBI gene;Acc:102185988]	-0.881119	0.000152674	0.00263758	no
chi-miR-362-5p	ENSCHIT00000038648	mRNA	ENSCHIG00000025333	KIF21A	kinesin family member 21A [Source:NCBI gene;Acc:102189737]	-0.811189	0.00136331	0.00845946	no
chi-miR-335-3p	ENSCHIT00000004550	mRNA	ENSCHIG00000003392			-0.882663	0.000143397	0.00263758	no
chi-miR-135a	ENSCHIT00000019095	mRNA	ENSCHIG00000013513	STK32A	serine/threonine kinase 32A [Source:NCBI gene;Acc:102171784]	-0.626971	0.0291129	0.0582904	no
chi-miR-502b-3p	ENSCHIT00000017575	mRNA	ENSCHIG00000012534	UNC5B	unc-5 netrin receptor B [Source:NCBI gene;Acc:102184034]	-0.874126	0.000200713	0.00307419	no
chi-miR-135b-5p	ENSCHIT00000019870	mRNA	ENSCHIG00000014002	MEOX2	mesenchyme homeobox 2 [Source:NCBI gene;Acc:102177402]	-0.608392	0.035806	0.0671753	no
chi-miR-136-3p	ENSCHIT00000026104	mRNA	ENSCHIG00000017596		cytoplasmic linker associated protein 2 [Source:NCBI gene;Acc:102179242]	-0.760071	0.00411738	0.0166456	no
chi-miR-27b-3p	ENSCHIT00000040999	mRNA	ENSCHIG00000026804	ENTPD5	ectonucleoside triphosphate diphosphohydrolase 5 [Source:NCBI gene;Acc:102187956]	-0.867133	0.000259812	0.00349172	no
chi-let-7b-5p	ENSCHIT00000021733	mRNA	ENSCHIG00000015154	MAMDC2	MAM domain containing 2 [Source:NCBI gene;Acc:102187485]	-0.749563	0.00500405	0.0182641	no
chi-miR-485-5p	ENSCHIT00000029275	mRNA	ENSCHIG00000019755	KCNK7	potassium two pore domain channel subfamily K member 7 [Source:NCBI gene;Acc:102172973]	-0.770579	0.00335518	0.0150422	no
chi-miR-497-5p	ENSCHIT00000021383	mRNA	ENSCHIG00000014919		mitogen-activated protein kinase kinase 2 [Source:NCBI gene;Acc:102175285]	-0.734316	0.00653792	0.0208088	no
chi-miR-497-5p	ENSCHIT00000021382	mRNA	ENSCHIG00000014954	WNK2	WNK lysine deficient protein kinase 2 [Source:NCBI gene;Acc:102191045]	-0.71804	0.00853932	0.024677	no
chi-miR-188-5p	ENSCHIT00000031818	mRNA	ENSCHIG00000021337	LCN2	lipocalin 2 [Source:NCBI gene;Acc:102188951]	-0.78171	0.00267007	0.0128393	no
chi-miR-378-5p	ENSCHIT00000014058	mRNA	ENSCHIG00000010221	FAM83G	family with sequence similarity 83 member G [Source:NCBI gene;Acc:106503264]	-0.923077	1.86e-05	0.000857647	no
chi-miR-34a	ENSCHIT00000035460	mRNA	ENSCHIG00000023444	FGFR4	fibroblast growth factor receptor 4 [Source:NCBI gene;Acc:102183685]	-0.839161	0.000642826	0.00565106	no
chi-miR-493-3p	ENSCHIT00000018984	mRNA	ENSCHIG00000013421	PLEKHA7	pleckstrin homology domain containing A7 [Source:NCBI gene;Acc:102189776]	-0.916084	2.84e-05	0.00111082	no
chi-let-7g-3p	ENSCHIT00000015066	mRNA	ENSCHIG00000010850	EBF4	EBF family member 4 [Source:NCBI gene;Acc:102172555]	-0.846154	0.000521134	0.00507581	no
chi-let-7b-5p	ENSCHIT00000024764	mRNA	ENSCHIG00000017004	MAN1C1	mannosidase alpha class 1C member 1 [Source:NCBI gene;Acc:102182552]	-0.776224	0.00299286	0.0137075	no
chi-miR-376e-5p	ENSCHIT00000026024	mRNA	ENSCHIG00000017690	TUT7	terminal uridylyl transferase 7 [Source:NCBI gene;Acc:102183514]	-0.831007	0.000811316	0.00638565	no
chi-miR-338-3p	ENSCHIT00000026213	mRNA	ENSCHIG00000017694	KIF21B	kinesin family member 21B [Source:NCBI gene;Acc:102174234]	-0.674356	0.0161631	0.0387018	no
chi-miR-381	ENSCHIT00000032340	mRNA	ENSCHIG00000021657	DDR1	discoidin domain receptor tyrosine kinase 1 [Source:NCBI gene;Acc:102182457]	-0.79021	0.00222314	0.0113699	no
chi-miR-193a	ENSCHIT00000021245	mRNA	ENSCHIG00000014845	PREX1	phosphatidylinositol-3,4,5-trisphosphate dependent Rac exchange factor 1 [Source:NCBI gene;Acc:102171529]	-0.79021	0.00222314	0.0113699	no
chi-miR-500-5p	ENSCHIT00000039236	mRNA	ENSCHIG00000025560	RAPGEF2	Rap guanine nucleotide exchange factor 2 [Source:NCBI gene;Acc:102187973]	-0.587413	0.0446093	0.0788368	no
chi-miR-3955-5p	ENSCHIT00000038682	mRNA	ENSCHIG00000025392	EPB41L1	erythrocyte membrane protein band 4.1 like 1 [Source:NCBI gene;Acc:102177452]	-0.818182	0.0011431	0.00771266	no
chi-miR-195-5p	ENSCHIT00000025145	mRNA	ENSCHIG00000017234	TRIM36	tripartite motif containing 36 [Source:NCBI gene;Acc:102188595]	-0.63239	0.0273439	0.0560025	no
chi-miR-154b-5p	ENSCHIT00000026232	mRNA	ENSCHIG00000017854	TCN1	transcobalamin 1 [Source:NCBI gene;Acc:102170716]	-0.753066	0.00469389	0.0174375	no
chi-miR-485-5p	ENSCHIT00000014369	mRNA	ENSCHIG00000010430	TMEM125	transmembrane protein 125 [Source:NCBI gene;Acc:106501981]	-0.643357	0.0240032	0.0507254	no
chi-miR-200a	ENSCHIT00000023758	mRNA	ENSCHIG00000016385	ZEB1	zinc finger E-box binding homeobox 1 [Source:NCBI gene;Acc:106502734]	-0.972028	1.29e-07	7.52e-05	no
chi-miR-129-5p	ENSCHIT00000035856	mRNA	ENSCHIG00000023684	KCNAB1	potassium voltage-gated channel subfamily A member regulatory beta subunit 1 [Source:NCBI gene;Acc:102183011]	-0.685315	0.013906	0.0344654	no
chi-miR-154b-5p	ENSCHIT00000040447	mRNA	ENSCHIG00000026473	ATG16L1	autophagy related 16 like 1 [Source:NCBI gene;Acc:102171213]	-0.804196	0.00161477	0.00939149	no
chi-miR-3959-3p	ENSCHIT00000028019	mRNA	ENSCHIG00000018930	CASP14	caspase 14 [Source:NCBI gene;Acc:102185913]	-0.832168	0.000785442	0.00623472	no
chi-miR-338-3p	ENSCHIT00000018316	mRNA	ENSCHIG00000012957	DCHS1	tripeptidyl peptidase 1 [Source:NCBI gene;Acc:102176981]	-0.741259	0.00580115	0.0197721	no
chi-miR-378-3p	ENSCHIT00000023574	mRNA	ENSCHIG00000016283	SYTL3	synaptotagmin like 3 [Source:NCBI gene;Acc:102181501]	-0.818182	0.0011431	0.00771266	no
chi-miR-93-5p	ENSCHIT00000011740	mRNA	ENSCHIG00000008500	GLS	glutaminase [Source:NCBI gene;Acc:102188907]	-0.755245	0.00450843	0.0174375	no
chi-miR-433	ENSCHIT00000010336	mRNA	ENSCHIG00000007582	FOXC1	forkhead box C1 [Source:NCBI gene;Acc:106503522]	-0.874126	0.000200713	0.00307419	no
chi-miR-2332	ENSCHIT00000023945	mRNA	ENSCHIG00000016498	DISP1	dispatched RND transporter family member 1 [Source:NCBI gene;Acc:102182522]	-0.664336	0.0184527	0.0422524	no
chi-miR-125a-5p	ENSCHIT00000040775	mRNA	ENSCHIG00000026674	TNS4	tensin 4 [Source:NCBI gene;Acc:102189708]	-0.594406	0.0415215	0.0747889	no
chi-miR-34c-5p	ENSCHIT00000035982	mRNA	ENSCHIG00000023751	NEBL	nebulette [Source:NCBI gene;Acc:106501793]	-0.769231	0.00344645	0.0150422	no
chi-miR-193a	ENSCHIT00000030909	mRNA	ENSCHIG00000020790	WFIKKN2	WAP, follistatin/kazal, immunoglobulin, kunitz and netrin domain containing 2 [Source:NCBI gene;Acc:102178659]	-0.900177	6.59e-05	0.00171392	no
chi-miR-1185-3p	ENSCHIT00000017875	mRNA	ENSCHIG00000012726	LAMP2	lysosomal associated membrane protein 2 [Source:NCBI gene;Acc:102189841]	-0.902098	6e-05	0.00158955	no
chi-miR-23b-3p	ENSCHIT00000010964	mRNA	ENSCHIG00000007595	DYSF	dysferlin [Source:NCBI gene;Acc:102187495]	-0.65035	0.0220342	0.0476499	no
chi-miR-432-5p	ENSCHIT00000032213	mRNA	ENSCHIG00000021572	VLDLR	very low density lipoprotein receptor [Source:NCBI gene;Acc:102177522]	-0.728548	0.00720175	0.0224232	no
chi-miR-665	ENSCHIT00000037801	mRNA	ENSCHIG00000024882			-0.657343	0.0201855	0.0449851	no
chi-miR-136-5p	ENSCHIT00000023071	mRNA	ENSCHIG00000015976	DRB3	HLA class II histocompatibility antigen, DRB1-4 beta chain [Source:NCBI gene;Acc:106503915]	-0.739055	0.00602782	0.0203162	no
chi-miR-136-5p	ENSCHIT00000023075	mRNA	ENSCHIG00000015976	DRB3	HLA class II histocompatibility antigen, DRB1-4 beta chain [Source:NCBI gene;Acc:106503915]	-0.783217	0.00258622	0.0125455	no
chi-miR-1197-3p	ENSCHIT00000018011	mRNA	ENSCHIG00000012743	UNC13B	unc-13 homolog B [Source:NCBI gene;Acc:102176042]	-0.713287	0.00920178	0.0258316	no
chi-miR-3955-3p	ENSCHIT00000012214	mRNA	ENSCHIG00000008891	PDLIM5	PDZ and LIM domain 5 [Source:NCBI gene;Acc:102189198]	-0.713287	0.00920178	0.0258316	no
chi-miR-1306-3p	ENSCHIT00000008880	mRNA	ENSCHIG00000005571	ITGB4	integrin subunit beta 4 [Source:NCBI gene;Acc:102191175]	-0.671329	0.0168315	0.0396093	no
chi-miR-200a	ENSCHIT00000022577	mRNA	ENSCHIG00000015662	MAP3K13	mitogen-activated protein kinase kinase kinase 13 [Source:NCBI gene;Acc:102178859]	-0.789479	0.00225916	0.0115163	no
chi-miR-27a-5p	ENSCHIT00000012243	mRNA	ENSCHIG00000008891	PDLIM5	PDZ and LIM domain 5 [Source:NCBI gene;Acc:102189198]	-0.661097	0.019241	0.043845	no
chi-miR-141	ENSCHIT00000020791	mRNA	ENSCHIG00000014556	CNTNAP4	contactin associated protein like 4 [Source:NCBI gene;Acc:102178296]	-0.727273	0.00735503	0.0224232	no
chi-miR-296-3p	ENSCHIT00000011523	mRNA	ENSCHIG00000008360	ECEL1	endothelin converting enzyme like 1 [Source:NCBI gene;Acc:102191476]	-0.761853	0.00397973	0.0162346	no
chi-miR-502b-3p	ENSCHIT00000022078	mRNA	ENSCHIG00000015373	KRT35	keratin 35 [Source:NCBI gene;Acc:102175327]	-0.724072	0.00775063	0.023066	no
chi-miR-24-3p	ENSCHIT00000009579	mRNA	ENSCHIG00000007073	BGN	biglycan [Source:NCBI gene;Acc:102183219]	-0.804196	0.00161477	0.00939149	no
chi-miR-502b-3p	ENSCHIT00000016781	mRNA	ENSCHIG00000012025		AHNAK nucleoprotein 2 [Source:NCBI gene;Acc:102188806]	-0.739455	0.00598623	0.0202327	no
chi-miR-493-3p	ENSCHIT00000036741	mRNA	ENSCHIG00000024208	CES3	carboxylesterase 3 [Source:NCBI gene;Acc:102177362]	-0.761853	0.00397973	0.0162346	no
chi-miR-141	ENSCHIT00000039484	mRNA	ENSCHIG00000025863	SMARCA2	SWI/SNF related, matrix associated, actin dependent regulator of chromatin, subfamily a, member 2 [Source:NCBI gene;Acc:102177796]	-0.671329	0.0168315	0.0396093	no
chi-miR-378-5p	ENSCHIT00000030253	mRNA	ENSCHIG00000020369	LIPM	lipase family member M [Source:NCBI gene;Acc:102190289]	-0.734316	0.00653792	0.0208088	no
chi-miR-708-5p	ENSCHIT00000020601	mRNA	ENSCHIG00000014445	VGLL2	vestigial like family member 2 [Source:NCBI gene;Acc:106501797]	-0.920895	2.13e-05	0.000951805	no
chi-miR-432-3p	ENSCHIT00000030802	mRNA	ENSCHIG00000020679	TGM1	transglutaminase 1 [Source:NCBI gene;Acc:102177982]	-0.734316	0.00653792	0.0208088	no
chi-miR-378-3p	ENSCHIT00000019052	mRNA	ENSCHIG00000013490	C7orf57	chromosome 4 C7orf57 homolog [Source:NCBI gene;Acc:102182939]	-0.846154	0.000521134	0.00507581	no
chi-miR-500-3p	ENSCHIT00000038491	mRNA	ENSCHIG00000025299	ADCK2	aarF domain containing kinase 2 [Source:NCBI gene;Acc:102173811]	-0.608392	0.035806	0.0671753	no
chi-miR-500-5p	ENSCHIT00000038773	mRNA	ENSCHIG00000025333	KIF21A	kinesin family member 21A [Source:NCBI gene;Acc:102189737]	-0.748608	0.00509129	0.0182641	no
chi-miR-130b-5p	ENSCHIT00000017878	mRNA	ENSCHIG00000012721	MFSD6	major facilitator superfamily domain containing 6 [Source:NCBI gene;Acc:102176368]	-0.742558	0.00567053	0.0197721	no
chi-miR-24-3p	ENSCHIT00000031168	mRNA	ENSCHIG00000020744	TNC	tenascin C [Source:NCBI gene;Acc:102179198]	-0.923077	1.86e-05	0.000857647	no
chi-miR-362-5p	ENSCHIT00000024556	mRNA	ENSCHIG00000016894	SLC17A7	solute carrier family 17 member 7 [Source:NCBI gene;Acc:102169042]	-0.898251	7.22e-05	0.00186719	no
chi-miR-154b-5p	ENSCHIT00000019166	mRNA	ENSCHIG00000013404	SPTAN1	spectrin alpha, non-erythrocytic 1 [Source:NCBI gene;Acc:102176892]	-0.909091	4.19e-05	0.00132895	no
chi-miR-196b	ENSCHIT00000035674	mRNA	ENSCHIG00000023563	MAPK13	mitogen-activated protein kinase 13 [Source:NCBI gene;Acc:100860996]	-0.762238	0.00395045	0.0162346	no
chi-miR-145-5p	ENSCHIT00000023935	mRNA	ENSCHIG00000016498	DISP1	dispatched RND transporter family member 1 [Source:NCBI gene;Acc:102182522]	-0.821058	0.00106096	0.007581	no
chi-miR-146b-5p	ENSCHIT00000029260	mRNA	ENSCHIG00000019735			-0.692308	0.012593	0.0322295	no
chi-miR-206	ENSCHIT00000026666	mRNA	ENSCHIG00000018113	SCARB1	scavenger receptor class B member 1 [Source:NCBI gene;Acc:102178475]	-0.615385	0.0331699	0.0636096	no
chi-miR-485-5p	ENSCHIT00000019088	mRNA	ENSCHIG00000013514		cornifin-A-like [Source:NCBI gene;Acc:102183026]	-0.741259	0.00580115	0.0197721	no
chi-miR-145-5p	ENSCHIT00000037141	mRNA	ENSCHIG00000024417	GNB5	G protein subunit beta 5 [Source:NCBI gene;Acc:102174574]	-0.629371	0.0283197	0.0569031	no
chi-miR-378-3p	ENSCHIT00000003997	mRNA	ENSCHIG00000002022	KDM5A	lysine demethylase 5A [Source:NCBI gene;Acc:102183856]	-0.685315	0.013906	0.0344654	no
chi-miR-432-5p	ENSCHIT00000035741	mRNA	ENSCHIG00000023602	PKP1	plakophilin 1 [Source:NCBI gene;Acc:102176987]	-0.734266	0.00654349	0.0208088	no
chi-miR-493-5p	ENSCHIT00000014273	mRNA	ENSCHIG00000010295	TMEM63B	transmembrane protein 63B [Source:NCBI gene;Acc:100861329]	-0.727273	0.00735503	0.0224232	no
chi-miR-487a-5p	ENSCHIT00000021543	mRNA	ENSCHIG00000015038	NHS	NHS actin remodeling regulator [Source:NCBI gene;Acc:102181284]	-0.59895	0.0395981	0.0724644	no
chi-miR-3955-3p	ENSCHIT00000033327	mRNA	ENSCHIG00000022217		bromodomain adjacent to zinc finger domain 2B [Source:NCBI gene;Acc:102191743]	-0.762238	0.00395045	0.0162346	no
chi-miR-127-3p	ENSCHIT00000031148	mRNA	ENSCHIG00000020653	SORL1	sortilin related receptor 1 [Source:NCBI gene;Acc:102187336]	-0.818182	0.0011431	0.00771266	no
chi-miR-432-3p	ENSCHIT00000041031	mRNA	ENSCHIG00000026820		ceruloplasmin [Source:NCBI gene;Acc:102172204]	-0.719759	0.00830862	0.0241721	no
chi-miR-29a-3p	ENSCHIT00000034211	mRNA	ENSCHIG00000022728	ESRRB	estrogen related receptor beta [Source:NCBI gene;Acc:102176243]	-0.812127	0.00133201	0.00845946	no
chi-miR-485-5p	ENSCHIT00000037772	mRNA	ENSCHIG00000024864	DLX2	distal-less homeobox 2 [Source:NCBI gene;Acc:102188447]	-0.910684	3.85e-05	0.00132895	no
chi-miR-34a	ENSCHIT00000016031	mRNA	ENSCHIG00000011462	ADAM33	ADAM metallopeptidase domain 33 [Source:NCBI gene;Acc:102170333]	-0.706294	0.0102452	0.0279658	no
chi-miR-485-5p	ENSCHIT00000037770	mRNA	ENSCHIG00000024863		sodium channel epithelial 1 delta subunit [Source:NCBI gene;Acc:102190806]	-0.853147	0.000418118	0.00442648	no
chi-miR-500-3p	ENSCHIT00000017063	mRNA	ENSCHIG00000012213		antileukoproteinase [Source:NCBI gene;Acc:102174044]	-0.755245	0.00450843	0.0174375	no
chi-miR-493-3p	ENSCHIT00000029580	mRNA	ENSCHIG00000019938	MYO5C	myosin VC [Source:NCBI gene;Acc:102168636]	-0.756569	0.00439849	0.0174375	no
chi-miR-125a-5p	ENSCHIT00000017749	mRNA	ENSCHIG00000012657		BOLA class I histocompatibility antigen, alpha chain BL3-7-like [Source:NCBI gene;Acc:102169753]	-0.605955	0.0367585	0.0686542	no
chi-miR-29a-3p	ENSCHIT00000033847	mRNA	ENSCHIG00000022452	ARHGAP28	Rho GTPase activating protein 28 [Source:NCBI gene;Acc:102172677]	-0.58042	0.047856	0.0829136	no
chi-miR-17-5p	ENSCHIT00000025465	mRNA	ENSCHIG00000017325	PTPRD	protein tyrosine phosphatase, receptor type D [Source:NCBI gene;Acc:102174567]	-0.879161	0.000165104	0.00279873	no
chi-miR-1197-3p	ENSCHIT00000014222	mRNA	ENSCHIG00000010295	TMEM63B	transmembrane protein 63B [Source:NCBI gene;Acc:100861329]	-0.79021	0.00222314	0.0113699	no
chi-let-7b-3p	ENSCHIT00000026675	mRNA	ENSCHIG00000018130	DTL	denticleless E3 ubiquitin protein ligase homolog [Source:NCBI gene;Acc:102185764]	-0.734266	0.00654349	0.0208088	no
chi-miR-195-5p	ENSCHIT00000041536	mRNA	ENSCHIG00000027120	DUSP27	dual specificity phosphatase 27, atypical [Source:NCBI gene;Acc:102189918]	-0.803194	0.00165353	0.00958044	no
chi-miR-500-3p	ENSCHIT00000039841	mRNA	ENSCHIG00000026103	EVPL	envoplakin [Source:NCBI gene;Acc:102170179]	-0.867133	0.000259812	0.00349172	no
chi-miR-500-3p	ENSCHIT00000039846	mRNA	ENSCHIG00000026103	EVPL	envoplakin [Source:NCBI gene;Acc:102170179]	-0.867133	0.000259812	0.00349172	no
chi-miR-19b-5p	ENSCHIT00000028131	mRNA	ENSCHIG00000018994	MPP6	membrane palmitoylated protein 6 [Source:NCBI gene;Acc:102174999]	-0.839161	0.000642826	0.00565106	no
chi-miR-376c-5p	ENSCHIT00000026024	mRNA	ENSCHIG00000017690	TUT7	terminal uridylyl transferase 7 [Source:NCBI gene;Acc:102183514]	-0.831007	0.000811316	0.00638565	no
chi-miR-17-5p	ENSCHIT00000029901	mRNA	ENSCHIG00000020126	ABCA13	ATP binding cassette subfamily A member 13 [Source:NCBI gene;Acc:102182661]	-0.650146	0.0220898	0.047739	no
chi-miR-24-3p	ENSCHIT00000041113	mRNA	ENSCHIG00000026875	CPNE6	copine 6 [Source:NCBI gene;Acc:102180500]	-0.755245	0.00450843	0.0174375	no
chi-miR-378-3p	ENSCHIT00000024159	mRNA	ENSCHIG00000016627	THBS2	thrombospondin 2 [Source:NCBI gene;Acc:102179674]	-0.823771	0.0009877	0.0071294	no
chi-miR-3955-5p	ENSCHIT00000012903	mRNA	ENSCHIG00000009404	AFTPH	aftiphilin [Source:NCBI gene;Acc:102178366]	-0.594406	0.0415215	0.0747889	no
chi-miR-27a-5p	ENSCHIT00000020691	mRNA	ENSCHIG00000014389	ITGA2B	integrin subunit alpha 2b [Source:NCBI gene;Acc:102183451]	-0.895105	8.37e-05	0.00191113	no
chi-let-7b-5p	ENSCHIT00000027924	mRNA	ENSCHIG00000018872	TULP1	tubby like protein 1 [Source:NCBI gene;Acc:102188367]	-0.839161	0.000642826	0.00565106	no
chi-miR-296-3p	ENSCHIT00000018192	mRNA	ENSCHIG00000012951	BMP2	bone morphogenetic protein 2 [Source:NCBI gene;Acc:100860831]	-0.605955	0.0367585	0.0686542	no
chi-miR-502b-3p	ENSCHIT00000004484	mRNA	ENSCHIG00000003280	NPHS2	NPHS2, podocin [Source:NCBI gene;Acc:102183170]	-0.734316	0.00653792	0.0208088	no
chi-miR-33a-3p	ENSCHIT00000032690	mRNA	ENSCHIG00000021834	MYH15	myosin heavy chain 15 [Source:NCBI gene;Acc:102175331]	-0.685423	0.013885	0.0344654	no
chi-miR-410-5p	ENSCHIT00000032527	mRNA	ENSCHIG00000021438	FN1	fibronectin 1 [Source:NCBI gene;Acc:102182645]	-0.640861	0.0247359	0.0520105	no
chi-miR-19b-5p	ENSCHIT00000027151	mRNA	ENSCHIG00000018385	TRIM45	tripartite motif containing 45 [Source:NCBI gene;Acc:102179902]	-0.636364	0.0260969	0.0536812	no
chi-miR-532-3p	ENSCHIT00000016032	mRNA	ENSCHIG00000011482	ACSBG1	acyl-CoA synthetase bubblegum family member 1 [Source:NCBI gene;Acc:102181437]	-0.650444	0.0220086	0.0476499	no
chi-miR-380-5p	ENSCHIT00000029512	mRNA	ENSCHIG00000019915	CA9	carbonic anhydrase 9 [Source:NCBI gene;Acc:102178356]	-0.721542	0.00807444	0.0239435	no
chi-miR-502b-3p	ENSCHIT00000035525	mRNA	ENSCHIG00000023400	CAPN3	calpain 3 [Source:NCBI gene;Acc:102189762]	-0.678426	0.0152956	0.0368991	no
chi-miR-214-3p	ENSCHIT00000019405	mRNA	ENSCHIG00000013677		aldehyde oxidase 4 [Source:NCBI gene;Acc:102171556]	-0.594406	0.0415215	0.0747889	no
chi-miR-184	ENSCHIT00000017799	mRNA	ENSCHIG00000012683	FGF10	fibroblast growth factor 10 [Source:NCBI gene;Acc:102174339]	-0.676264	0.0157521	0.0378821	no
chi-miR-136-5p	ENSCHIT00000034729	mRNA	ENSCHIG00000022993	NBEAL2	neurobeachin like 2 [Source:NCBI gene;Acc:102183647]	-0.699301	0.0113742	0.0299838	no
chi-miR-135a	ENSCHIT00000028699	mRNA	ENSCHIG00000019369	ZNF185	zinc finger protein 185 with LIM domain [Source:NCBI gene;Acc:102173822]	-0.58494	0.0457391	0.0805966	no
chi-miR-660	ENSCHIT00000034566	mRNA	ENSCHIG00000022930	MRPS10	mitochondrial ribosomal protein S10 [Source:NCBI gene;Acc:100861002]	-0.965035	3.88e-07	0.000128207	no
chi-miR-135a	ENSCHIT00000028690	mRNA	ENSCHIG00000019362	GNGT1	G protein subunit gamma transducin 1 [Source:NCBI gene;Acc:102185427]	-0.591564	0.0427573	0.0766904	no
chi-let-7b-5p	ENSCHIT00000018837	mRNA	ENSCHIG00000013312	FBN2	fibrillin 2 [Source:NCBI gene;Acc:102173553]	-0.755245	0.00450843	0.0174375	no
chi-miR-127-5p	ENSCHIT00000026023	mRNA	ENSCHIG00000017725	SLC6A15	solute carrier family 6 member 15 [Source:NCBI gene;Acc:102191018]	-0.655032	0.0207834	0.0460228	no
chi-miR-485-3p	ENSCHIT00000019567	mRNA	ENSCHIG00000013810	PLPP4	phospholipid phosphatase 4 [Source:NCBI gene;Acc:102169156]	-0.691232	0.0127887	0.0326629	no
chi-miR-27a-5p	ENSCHIT00000026862	mRNA	ENSCHIG00000018238	TCF20	transcription factor 20 [Source:NCBI gene;Acc:102171958]	-0.741259	0.00580115	0.0197721	no
chi-miR-1197-3p	ENSCHIT00000033270	mRNA	ENSCHIG00000022083	AFDN	afadin, adherens junction formation factor [Source:NCBI gene;Acc:106502495]	-0.916084	2.84e-05	0.00111082	no
chi-miR-376d	ENSCHIT00000015419	mRNA	ENSCHIG00000011108	RTKN2	rhotekin 2 [Source:NCBI gene;Acc:102174092]	-0.886166	0.000123989	0.00239414	no
chi-miR-338-3p	ENSCHIT00000010871	mRNA	ENSCHIG00000007908	CACNG6	calcium voltage-gated channel auxiliary subunit gamma 6 [Source:NCBI gene;Acc:102176552]	-0.581437	0.0473736	0.0829136	no
chi-let-7b-5p	ENSCHIT00000036221	mRNA	ENSCHIG00000023908	EPB41L3	erythrocyte membrane protein band 4.1 like 3 [Source:NCBI gene;Acc:102172400]	-0.93007	1.17e-05	0.000710365	no
chi-miR-296-3p	ENSCHIT00000029535	mRNA	ENSCHIG00000019930	GPR157	G protein-coupled receptor 157 [Source:NCBI gene;Acc:102177057]	-0.839161	0.000642826	0.00565106	no
chi-miR-432-3p	ENSCHIT00000032725	mRNA	ENSCHIG00000021847	ARHGAP27	Rho GTPase activating protein 27 [Source:NCBI gene;Acc:102168300]	-0.671329	0.0168315	0.0396093	no
chi-miR-767	ENSCHIT00000015419	mRNA	ENSCHIG00000011108	RTKN2	rhotekin 2 [Source:NCBI gene;Acc:102174092]	-0.823119	0.00100495	0.00722237	no
chi-miR-485-5p	ENSCHIT00000020463	mRNA	ENSCHIG00000014356		potassium voltage-gated channel subfamily H member 1 [Source:NCBI gene;Acc:102191162]	-0.778952	0.00282881	0.013456	no
chi-miR-34a	ENSCHIT00000031116	mRNA	ENSCHIG00000020744	TNC	tenascin C [Source:NCBI gene;Acc:102179198]	-0.79021	0.00222314	0.0113699	no
chi-miR-382-5p	ENSCHIT00000028107	mRNA	ENSCHIG00000018974	LRP2	LDL receptor related protein 2 [Source:NCBI gene;Acc:102190361]	-0.839161	0.000642826	0.00565106	no
chi-miR-27a-5p	ENSCHIT00000015784	mRNA	ENSCHIG00000011334	ZBTB8A	zinc finger and BTB domain containing 8A [Source:NCBI gene;Acc:102185695]	-0.664336	0.0184527	0.0422524	no
chi-miR-145-3p	ENSCHIT00000015946	mRNA	ENSCHIG00000011401	DNAH11	dynein axonemal heavy chain 11 [Source:NCBI gene;Acc:106501759]	-0.910684	3.85e-05	0.00132895	no
chi-miR-146b-5p	ENSCHIT00000037015	mRNA	ENSCHIG00000024391	PRKACB	protein kinase cAMP-activated catalytic subunit beta [Source:NCBI gene;Acc:102168790]	-0.699301	0.0113742	0.0299838	no
chi-let-7g-3p	ENSCHIT00000023971	mRNA	ENSCHIG00000016519	BEND6	BEN domain containing 6 [Source:NCBI gene;Acc:102182356]	-0.727273	0.00735503	0.0224232	no
chi-miR-502b-3p	ENSCHIT00000036957	mRNA	ENSCHIG00000024347	VSIG10L	V-set and immunoglobulin domain containing 10 like [Source:NCBI gene;Acc:102183591]	-0.79021	0.00222314	0.0113699	no
chi-miR-376d	ENSCHIT00000035034	mRNA	ENSCHIG00000023205	MTCL1	microtubule crosslinking factor 1 [Source:NCBI gene;Acc:102176574]	-0.853147	0.000418118	0.00442648	no
chi-miR-195-5p	ENSCHIT00000022476	mRNA	ENSCHIG00000015485	CNTN3	contactin 3 [Source:NCBI gene;Acc:102188718]	-0.872155	0.000216175	0.00322153	no
chi-miR-376b-5p	ENSCHIT00000023918	mRNA	ENSCHIG00000016493	COL8A1	collagen type VIII alpha 1 chain [Source:NCBI gene;Acc:102175894]	-0.622378	0.0306759	0.0602888	no
chi-miR-3959-3p	ENSCHIT00000028522	mRNA	ENSCHIG00000019262	TMEM9B	TMEM9 domain family member B [Source:NCBI gene;Acc:102169977]	-0.86014	0.000331668	0.00393286	no
chi-miR-1197-3p	ENSCHIT00000014037	mRNA	ENSCHIG00000010175	PADI3	peptidyl arginine deiminase 3 [Source:NCBI gene;Acc:102171827]	-0.795098	0.00199349	0.0106977	no
chi-miR-383	ENSCHIT00000028341	mRNA	ENSCHIG00000019030	SLC15A1	solute carrier family 15 member 1 [Source:NCBI gene;Acc:102175866]	-0.752674	0.00472788	0.0174375	no
chi-miR-27b-3p	ENSCHIT00000028411	mRNA	ENSCHIG00000019098	MEGF6	multiple EGF like domains 6 [Source:HGNC Symbol;Acc:HGNC:3232]	-0.622378	0.0306759	0.0602888	no
chi-miR-362-5p	ENSCHIT00000028741	mRNA	ENSCHIG00000019371	ABCA12	ATP binding cassette subfamily A member 12 [Source:NCBI gene;Acc:102174076]	-0.907182	4.63e-05	0.001433	no
chi-miR-411b-3p	ENSCHIT00000028648	mRNA	ENSCHIG00000019335	NOX1	NADPH oxidase 1 [Source:NCBI gene;Acc:102178048]	-0.704029	0.0106012	0.0287848	no
chi-miR-412-5p	ENSCHIT00000023556	mRNA	ENSCHIG00000016271	DSG2	desmoglein 2 [Source:NCBI gene;Acc:102187443]	-0.657343	0.0201855	0.0449851	no
chi-miR-34c-5p	ENSCHIT00000018937	mRNA	ENSCHIG00000013381	SIPA1L3	signal induced proliferation associated 1 like 3 [Source:NCBI gene;Acc:102177831]	-0.635092	0.0264915	0.0544646	no
chi-miR-34a	ENSCHIT00000029626	mRNA	ENSCHIG00000019950	GRAMD1A	GRAM domain containing 1A [Source:NCBI gene;Acc:102189151]	-0.938705	6.14e-06	0.000521858	no
chi-miR-19b-5p	ENSCHIT00000015184	mRNA	ENSCHIG00000010895	NCOA2	nuclear receptor coactivator 2 [Source:NCBI gene;Acc:102176142]	-0.739001	0.00603345	0.0203162	no
chi-miR-29a-3p	ENSCHIT00000013188	mRNA	ENSCHIG00000009616	COL2A1	collagen type II alpha 1 chain [Source:NCBI gene;Acc:100860743]	-0.825175	0.000951363	0.00690982	no
chi-miR-211	ENSCHIT00000000421	mRNA	ENSCHIG00000000282	ZMIZ1	zinc finger MIZ-type containing 1 [Source:NCBI gene;Acc:102187104]	-0.671329	0.0168315	0.0396093	no
chi-let-7g-3p	ENSCHIT00000040085	mRNA	ENSCHIG00000026141	OBSCN	obscurin, cytoskeletal calmodulin and titin-interacting RhoGEF [Source:NCBI gene;Acc:106502252]	-0.853147	0.000418118	0.00442648	no
chi-miR-141	ENSCHIT00000020261	mRNA	ENSCHIG00000014187	TECTA	tectorin alpha [Source:NCBI gene;Acc:102180239]	-0.848104	0.000490618	0.00506173	no
chi-miR-193b-3p	ENSCHIT00000040048	mRNA	ENSCHIG00000026141	OBSCN	obscurin, cytoskeletal calmodulin and titin-interacting RhoGEF [Source:NCBI gene;Acc:106502252]	-0.818992	0.00111948	0.00771266	no
chi-miR-532-5p	ENSCHIT00000026625	mRNA	ENSCHIG00000018096			-0.594406	0.0415215	0.0747889	no
chi-miR-362-5p	ENSCHIT00000034566	mRNA	ENSCHIG00000022930	MRPS10	mitochondrial ribosomal protein S10 [Source:NCBI gene;Acc:100861002]	-0.93007	1.17e-05	0.000710365	no
chi-miR-221-5p	ENSCHIT00000031939	mRNA	ENSCHIG00000021342	TLN2	talin 2 [Source:NCBI gene;Acc:102175583]	-0.727273	0.00735503	0.0224232	no
chi-miR-24-3p	ENSCHIT00000040881	mRNA	ENSCHIG00000026731	CSF1R	colony stimulating factor 1 receptor [Source:NCBI gene;Acc:100861303]	-0.608392	0.035806	0.0671753	no
chi-miR-146b-5p	ENSCHIT00000015946	mRNA	ENSCHIG00000011401	DNAH11	dynein axonemal heavy chain 11 [Source:NCBI gene;Acc:106501759]	-0.795098	0.00199349	0.0106977	no
chi-miR-214-3p	ENSCHIT00000028666	mRNA	ENSCHIG00000019342	SLC40A1	solute carrier family 40 member 1 [Source:NCBI gene;Acc:102182451]	-0.748252	0.00512408	0.0182641	no
chi-miR-500-5p	ENSCHIT00000000166	mRNA	ENSCHIG00000000114	LYST	lysosomal trafficking regulator [Source:NCBI gene;Acc:102170942]	-0.65035	0.0220342	0.0476499	no
chi-miR-214-3p	ENSCHIT00000014784	mRNA	ENSCHIG00000010699		keratin-associated protein 9-2-like [Source:NCBI gene;Acc:108638292]	-0.679259	0.0151222	0.0368991	no
chi-miR-195-3p	ENSCHIT00000015403	mRNA	ENSCHIG00000011087	SLC8A3	solute carrier family 8 member A3 [Source:NCBI gene;Acc:102177443]	-0.937063	6.99e-06	0.000521858	no
chi-miR-154b-5p	ENSCHIT00000020849	mRNA	ENSCHIG00000014573	CDC14A	cell division cycle 14A [Source:NCBI gene;Acc:102176004]	-0.86515	0.000278812	0.00364106	no
chi-miR-105a	ENSCHIT00000023263	mRNA	ENSCHIG00000016104		probable 2-ketogluconate reductase [Source:NCBI gene;Acc:102184018]	-0.622378	0.0306759	0.0602888	no
chi-miR-502b-3p	ENSCHIT00000027663	mRNA	ENSCHIG00000018699	SUCLA2	succinate-CoA ligase ADP-forming beta subunit [Source:NCBI gene;Acc:102182885]	-0.671329	0.0168315	0.0396093	no
chi-miR-3431-5p	ENSCHIT00000028213	mRNA	ENSCHIG00000019063	SERPINB8	serpin B8 [Source:NCBI gene;Acc:102169925]	-0.601399	0.0385885	0.0708848	no
chi-miR-200a	ENSCHIT00000000758	mRNA	ENSCHIG00000000514	POFUT2	protein O-fucosyltransferase 2 [Source:NCBI gene;Acc:102174438]	-0.916084	2.84e-05	0.00111082	no
chi-let-7b-5p	ENSCHIT00000019275	mRNA	ENSCHIG00000013629	FGF6	fibroblast growth factor 6 [Source:NCBI gene;Acc:102180381]	-0.913643	3.27e-05	0.00120733	no
chi-miR-193b-3p	ENSCHIT00000031513	mRNA	ENSCHIG00000021055	FLNC	filamin C [Source:NCBI gene;Acc:102170485]	-0.881119	0.000152674	0.00263758	no
chi-miR-214-3p	ENSCHIT00000019269	mRNA	ENSCHIG00000013627	ASPRV1	aspartic peptidase retroviral like 1 [Source:NCBI gene;Acc:102176136]	-0.603198	0.0378582	0.0705555	no
chi-miR-296-3p	ENSCHIT00000016453	mRNA	ENSCHIG00000011729	CHD7	chromodomain helicase DNA binding protein 7 [Source:NCBI gene;Acc:102188956]	-0.600905	0.0387904	0.0712162	no
chi-miR-221-3p	ENSCHIT00000007943	mRNA	ENSCHIG00000005911	EPC1	enhancer of polycomb homolog 1 [Source:NCBI gene;Acc:102183613]	-0.902098	6e-05	0.00158955	no
chi-miR-378-5p	ENSCHIT00000032901	mRNA	ENSCHIG00000021957	ZC3H12A	zinc finger CCCH-type containing 12A [Source:NCBI gene;Acc:102190376]	-0.713287	0.00920178	0.0258316	no
chi-miR-493-3p	ENSCHIT00000023961	mRNA	ENSCHIG00000016491	MTUS1	microtubule associated scaffold protein 1 [Source:NCBI gene;Acc:102168885]	-0.839161	0.000642826	0.00565106	no
chi-miR-485-5p	ENSCHIT00000022744	mRNA	ENSCHIG00000015724	TMC6	transmembrane channel like 6 [Source:NCBI gene;Acc:102188799]	-0.660818	0.0193102	0.0439322	no
chi-miR-154b-5p	ENSCHIT00000017368	mRNA	ENSCHIG00000012395	CGNL1	cingulin like 1 [Source:NCBI gene;Acc:102182596]	-0.881119	0.000152674	0.00263758	no
chi-let-7b-5p	ENSCHIT00000030422	mRNA	ENSCHIG00000020456	MYO15A	myosin XVA [Source:NCBI gene;Acc:102182167]	-0.886166	0.000123989	0.00239414	no
chi-miR-154b-5p	ENSCHIT00000027420	mRNA	ENSCHIG00000018457	MYO6	myosin VI [Source:NCBI gene;Acc:102191524]	-0.79021	0.00222314	0.0113699	no
chi-miR-758	ENSCHIT00000022507	mRNA	ENSCHIG00000015617	RNF180	ring finger protein 180 [Source:NCBI gene;Acc:102174160]	-0.797203	0.00190037	0.0103462	no
chi-miR-504	ENSCHIT00000038487	mRNA	ENSCHIG00000025310	PTK6	protein tyrosine kinase 6 [Source:NCBI gene;Acc:102182806]	-0.853147	0.000418118	0.00442648	no
chi-miR-145-3p	ENSCHIT00000032074	mRNA	ENSCHIG00000021484	TRAF3IP3	TRAF3 interacting protein 3 [Source:NCBI gene;Acc:102190719]	-0.821058	0.00106096	0.007581	no
chi-miR-143-5p	ENSCHIT00000037771	mRNA	ENSCHIG00000024861	VIPR2	vasoactive intestinal peptide receptor 2 [Source:NCBI gene;Acc:102171574]	-0.741259	0.00580115	0.0197721	no
chi-miR-135a	ENSCHIT00000007644	mRNA	ENSCHIG00000005522		cathepsin D [Source:NCBI gene;Acc:106504021]	-0.671329	0.0168315	0.0396093	no
chi-miR-432-5p	ENSCHIT00000013199	mRNA	ENSCHIG00000009625	LRRC8D	leucine rich repeat containing 8 VRAC subunit D [Source:NCBI gene;Acc:102172858]	-0.874126	0.000200713	0.00307419	no
chi-miR-493-5p	ENSCHIT00000021200	mRNA	ENSCHIG00000014808	MDGA2	MAM domain containing glycosylphosphatidylinositol anchor 2 [Source:NCBI gene;Acc:102181042]	-0.782166	0.00264443	0.0127563	no
chi-miR-500-3p	ENSCHIT00000033327	mRNA	ENSCHIG00000022217		bromodomain adjacent to zinc finger domain 2B [Source:NCBI gene;Acc:102191743]	-0.86014	0.000331668	0.00393286	no
chi-miR-224-5p	ENSCHIT00000019095	mRNA	ENSCHIG00000013513	STK32A	serine/threonine kinase 32A [Source:NCBI gene;Acc:102171784]	-0.581437	0.0473736	0.0829136	no
chi-miR-128-3p	ENSCHIT00000017542	mRNA	ENSCHIG00000012516	PTGFR	prostaglandin F receptor [Source:NCBI gene;Acc:102173625]	-0.853147	0.000418118	0.00442648	no
chi-miR-338-3p	ENSCHIT00000036973	mRNA	ENSCHIG00000024359	SYDE1	synapse defective Rho GTPase homolog 1 [Source:NCBI gene;Acc:102190034]	-0.797203	0.00190037	0.0103462	no
chi-miR-135b-5p	ENSCHIT00000027904	mRNA	ENSCHIG00000018817	ADAMTS19	ADAM metallopeptidase with thrombospondin type 1 motif 19 [Source:NCBI gene;Acc:102170967]	-0.636364	0.0260969	0.0536812	no
chi-miR-34a	ENSCHIT00000040465	mRNA	ENSCHIG00000026509	C4orf54	chromosome 6 C4orf54 homolog [Source:NCBI gene;Acc:102179365]	-0.739055	0.00602782	0.0203162	no
chi-miR-1185-3p	ENSCHIT00000018012	mRNA	ENSCHIG00000012758	ITPRID2	ITPR interacting domain containing 2 [Source:NCBI gene;Acc:102168493]	-0.636364	0.0260969	0.0536812	no
chi-miR-500-3p	ENSCHIT00000026029	mRNA	ENSCHIG00000017596		cytoplasmic linker associated protein 2 [Source:NCBI gene;Acc:102179242]	-0.671995	0.0166827	0.0396093	no
chi-miR-493-3p	ENSCHIT00000004484	mRNA	ENSCHIG00000003280	NPHS2	NPHS2, podocin [Source:NCBI gene;Acc:102183170]	-0.752674	0.00472788	0.0174375	no
chi-miR-20a-5p	ENSCHIT00000029316	mRNA	ENSCHIG00000019778	RGS12	regulator of G protein signaling 12 [Source:NCBI gene;Acc:102182684]	-0.664336	0.0184527	0.0422524	no
chi-miR-24-3p	ENSCHIT00000012081	mRNA	ENSCHIG00000008761	NDN	necdin, MAGE family member [Source:NCBI gene;Acc:102176779]	-0.895105	8.37e-05	0.00191113	no
chi-miR-193b-3p	ENSCHIT00000031062	mRNA	ENSCHIG00000020744	TNC	tenascin C [Source:NCBI gene;Acc:102179198]	-0.944056	3.93e-06	0.000389781	no
chi-miR-93-5p	ENSCHIT00000025723	mRNA	ENSCHIG00000017560	PCDHAC2	protocadherin alpha-C2 [Source:NCBI gene;Acc:102181119]	-0.811189	0.00136331	0.00845946	no
chi-miR-338-3p	ENSCHIT00000015946	mRNA	ENSCHIG00000011401	DNAH11	dynein axonemal heavy chain 11 [Source:NCBI gene;Acc:106501759]	-0.882663	0.000143397	0.00263758	no
chi-miR-493-3p	ENSCHIT00000025281	mRNA	ENSCHIG00000017127	MYH6	myosin-6 [Source:NCBI gene;Acc:106502520]	-0.902098	6e-05	0.00158955	no
chi-miR-224-5p	ENSCHIT00000028221	mRNA	ENSCHIG00000019071	ANKH	ANKH inorganic pyrophosphate transport regulator [Source:NCBI gene;Acc:102191559]	-0.601399	0.0385885	0.0708848	no
chi-miR-376c-5p	ENSCHIT00000028741	mRNA	ENSCHIG00000019371	ABCA12	ATP binding cassette subfamily A member 12 [Source:NCBI gene;Acc:102174076]	-0.700526	0.0111699	0.0299838	no
chi-miR-29a-3p	ENSCHIT00000020502	mRNA	ENSCHIG00000014281	NEB	nebulin [Source:NCBI gene;Acc:102180806]	-0.622378	0.0306759	0.0602888	no
chi-miR-433	ENSCHIT00000019632	mRNA	ENSCHIG00000013843	STARD10	StAR related lipid transfer domain containing 10 [Source:NCBI gene;Acc:102179793]	-0.727273	0.00735503	0.0224232	no
chi-miR-497-5p	ENSCHIT00000038041	mRNA	ENSCHIG00000024973	ADGRB2	adhesion G protein-coupled receptor B2 [Source:NCBI gene;Acc:102172582]	-0.615385	0.0331699	0.0636096	no
chi-miR-221-5p	ENSCHIT00000016360	mRNA	ENSCHIG00000011725	PCYT1B	phosphate cytidylyltransferase 1, choline, beta [Source:NCBI gene;Acc:102180205]	-0.629371	0.0283197	0.0569031	no
chi-miR-141	ENSCHIT00000039836	mRNA	ENSCHIG00000026047	ADCY8	adenylate cyclase 8 [Source:NCBI gene;Acc:102184919]	-0.577479	0.0492696	0.0849181	no
chi-miR-3955-5p	ENSCHIT00000000571	mRNA	ENSCHIG00000000386		oxysterol binding protein like 1A [Source:NCBI gene;Acc:100861010]	-0.755245	0.00450843	0.0174375	no
chi-miR-379-5p	ENSCHIT00000021514	mRNA	ENSCHIG00000014923	VWA8	von Willebrand factor A domain containing 8 [Source:NCBI gene;Acc:102176618]	-0.832168	0.000785442	0.00623472	no
chi-miR-214-3p	ENSCHIT00000028781	mRNA	ENSCHIG00000019419	OSGIN1	oxidative stress induced growth inhibitor 1 [Source:NCBI gene;Acc:102181147]	-0.728548	0.00720175	0.0224232	no
chi-miR-502b-5p	ENSCHIT00000018554	mRNA	ENSCHIG00000013172	MTERF1	mitochondrial transcription termination factor 1 [Source:NCBI gene;Acc:102176294]	-0.587413	0.0446093	0.0788368	no
chi-miR-504	ENSCHIT00000014192	mRNA	ENSCHIG00000010259	PIP4K2C	phosphatidylinositol-5-phosphate 4-kinase type 2 gamma [Source:NCBI gene;Acc:102187654]	-0.895105	8.37e-05	0.00191113	no
chi-miR-34c-5p	ENSCHIT00000030704	mRNA	ENSCHIG00000020623	PPFIBP2	PPFIA binding protein 2 [Source:NCBI gene;Acc:102187066]	-0.839161	0.000642826	0.00565106	no
chi-miR-135a	ENSCHIT00000014439	mRNA	ENSCHIG00000010470	FAM214A	family with sequence similarity 214 member A [Source:NCBI gene;Acc:102190965]	-0.727273	0.00735503	0.0224232	no
chi-miR-136-5p	ENSCHIT00000028698	mRNA	ENSCHIG00000019250		ubiquitin specific peptidase 32 [Source:NCBI gene;Acc:102174242]	-0.664336	0.0184527	0.0422524	no
chi-miR-146b-5p	ENSCHIT00000019819	mRNA	ENSCHIG00000013895	ARMC9	armadillo repeat containing 9 [Source:NCBI gene;Acc:102177943]	-0.692308	0.012593	0.0322295	no
chi-miR-127-5p	ENSCHIT00000017390	mRNA	ENSCHIG00000012426		cytochrome P450 3A24 [Source:NCBI gene;Acc:102181382]	-0.671329	0.0168315	0.0396093	no
chi-miR-543-3p	ENSCHIT00000037599	mRNA	ENSCHIG00000024746	NOD2	nucleotide binding oligomerization domain containing 2 [Source:NCBI gene;Acc:102186424]	-0.854642	0.000398308	0.00442648	no
chi-miR-495-3p	ENSCHIT00000029640	mRNA	ENSCHIG00000019972	PITPNA	phosphatidylinositol transfer protein alpha [Source:HGNC Symbol;Acc:HGNC:9001]	-0.594406	0.0415215	0.0747889	no
chi-miR-146b-5p	ENSCHIT00000020607	mRNA	ENSCHIG00000014430	AKAP13	A-kinase anchoring protein 13 [Source:NCBI gene;Acc:102184845]	-0.594406	0.0415215	0.0747889	no
chi-miR-141	ENSCHIT00000031352	mRNA	ENSCHIG00000021007	P4HA2	prolyl 4-hydroxylase subunit alpha-2 [Source:NCBI gene;Acc:102189116]	-0.643357	0.0240032	0.0507254	no
chi-miR-296-3p	ENSCHIT00000032579	mRNA	ENSCHIG00000021796	KLK12	kallikrein related peptidase 12 [Source:NCBI gene;Acc:102179696]	-0.713287	0.00920178	0.0258316	no
chi-miR-378-5p	ENSCHIT00000010488	mRNA	ENSCHIG00000007683	SAMD9	sterile alpha motif domain containing 9 [Source:NCBI gene;Acc:102180452]	-0.839161	0.000642826	0.00565106	no
chi-miR-660	ENSCHIT00000039580	mRNA	ENSCHIG00000025944	CADM1	cell adhesion molecule 1 [Source:NCBI gene;Acc:102182328]	-0.979021	3.09e-08	3.61e-05	no
chi-miR-200a	ENSCHIT00000015184	mRNA	ENSCHIG00000010895	NCOA2	nuclear receptor coactivator 2 [Source:NCBI gene;Acc:102176142]	-0.690481	0.0129267	0.032956	no
chi-miR-767	ENSCHIT00000014780	mRNA	ENSCHIG00000010653	SERPINC1	serpin family C member 1 [Source:NCBI gene;Acc:102179120]	-0.782461	0.00262801	0.0126955	no
chi-miR-504	ENSCHIT00000018278	mRNA	ENSCHIG00000013005	LRRC26	leucine rich repeat containing 26 [Source:NCBI gene;Acc:108637187]	-0.745625	0.005371	0.0189807	no
chi-miR-135b-5p	ENSCHIT00000023748	mRNA	ENSCHIG00000016385	ZEB1	zinc finger E-box binding homeobox 1 [Source:NCBI gene;Acc:106502734]	-0.958042	9.54e-07	0.000199411	no
chi-miR-382-5p	ENSCHIT00000011523	mRNA	ENSCHIG00000008360	ECEL1	endothelin converting enzyme like 1 [Source:NCBI gene;Acc:102191476]	-0.752674	0.00472788	0.0174375	no
chi-miR-17-5p	ENSCHIT00000011378	mRNA	ENSCHIG00000008263	NCALD	neurocalcin delta [Source:NCBI gene;Acc:102189774]	-0.839161	0.000642826	0.00565106	no
chi-miR-767	ENSCHIT00000009123	mRNA	ENSCHIG00000006791	CAMSAP3	calmodulin regulated spectrin associated protein family member 3 [Source:NCBI gene;Acc:106504042]	-0.636364	0.0260969	0.0536812	no
chi-miR-376e-5p	ENSCHIT00000023921	mRNA	ENSCHIG00000016493	COL8A1	collagen type VIII alpha 1 chain [Source:NCBI gene;Acc:102175894]	-0.788779	0.00229405	0.011665	no
chi-miR-338-3p	ENSCHIT00000032074	mRNA	ENSCHIG00000021484	TRAF3IP3	TRAF3 interacting protein 3 [Source:NCBI gene;Acc:102190719]	-0.687724	0.0134428	0.0340922	no
chi-miR-130b-5p	ENSCHIT00000020392	mRNA	ENSCHIG00000014309	CAPSL	calcyphosine like [Source:NCBI gene;Acc:102174600]	-0.725137	0.00761729	0.0227305	no
chi-miR-432-3p	ENSCHIT00000037753	mRNA	ENSCHIG00000024827	GPR155	G protein-coupled receptor 155 [Source:NCBI gene;Acc:102182350]	-0.755245	0.00450843	0.0174375	no
chi-miR-127-5p	ENSCHIT00000023698	mRNA	ENSCHIG00000016353		dihydrolipoamide branched chain transacylase E2 [Source:NCBI gene;Acc:102176842]	-0.764917	0.00375117	0.0160927	no
chi-miR-1197-3p	ENSCHIT00000023711	mRNA	ENSCHIG00000016389			-0.907182	4.63e-05	0.001433	no
chi-miR-433	ENSCHIT00000035486	mRNA	ENSCHIG00000023464		DnaJ heat shock protein family (Hsp40) member A2 [Source:NCBI gene;Acc:102173960]	-0.839161	0.000642826	0.00565106	no
chi-miR-378-3p	ENSCHIT00000018821	mRNA	ENSCHIG00000013332	AMPD3	adenosine monophosphate deaminase 3 [Source:NCBI gene;Acc:102176807]	-0.853147	0.000418118	0.00442648	no
chi-let-7g-3p	ENSCHIT00000013543	mRNA	ENSCHIG00000009814	LDB3	LIM domain binding 3 [Source:NCBI gene;Acc:102188195]	-0.826621	0.000915011	0.00690982	no
chi-miR-128-3p	ENSCHIT00000020642	mRNA	ENSCHIG00000014470		ataxin 3 [Source:NCBI gene;Acc:102188805]	-0.846154	0.000521134	0.00507581	no
chi-miR-193b-3p	ENSCHIT00000000336	mRNA	ENSCHIG00000000224	TUBGCP3	tubulin gamma complex associated protein 3 [Source:NCBI gene;Acc:102173579]	-0.608392	0.035806	0.0671753	no
chi-miR-493-5p	ENSCHIT00000008946	mRNA	ENSCHIG00000005571	ITGB4	integrin subunit beta 4 [Source:NCBI gene;Acc:102191175]	-0.923077	1.86e-05	0.000857647	no
chi-miR-136-3p	ENSCHIT00000014391	mRNA	ENSCHIG00000010393	DCLK2	doublecortin like kinase 2 [Source:NCBI gene;Acc:102172000]	-0.684381	0.0140886	0.0349093	no
chi-miR-487a-5p	ENSCHIT00000020845	mRNA	ENSCHIG00000014615		solute carrier family 25 member 10 [Source:NCBI gene;Acc:102181072]	-0.706294	0.0102452	0.0279658	no
chi-miR-20a-5p	ENSCHIT00000031116	mRNA	ENSCHIG00000020744	TNC	tenascin C [Source:NCBI gene;Acc:102179198]	-0.622378	0.0306759	0.0602888	no
chi-miR-146b-3p	ENSCHIT00000038041	mRNA	ENSCHIG00000024973	ADGRB2	adhesion G protein-coupled receptor B2 [Source:NCBI gene;Acc:102172582]	-0.622378	0.0306759	0.0602888	no
chi-miR-127-5p	ENSCHIT00000038308	mRNA	ENSCHIG00000025143	CELSR2	cadherin EGF LAG seven-pass G-type receptor 2 [Source:NCBI gene;Acc:102186733]	-0.874126	0.000200713	0.00307419	no
chi-miR-135a	ENSCHIT00000030195	mRNA	ENSCHIG00000020336	RASEF	RAS and EF-hand domain containing [Source:NCBI gene;Acc:102186118]	-0.591945	0.0425902	0.0764528	no
chi-miR-200a	ENSCHIT00000020261	mRNA	ENSCHIG00000014187	TECTA	tectorin alpha [Source:NCBI gene;Acc:102180239]	-0.841037	0.000608225	0.00565106	no
chi-miR-296-3p	ENSCHIT00000031881	mRNA	ENSCHIG00000021373	KIAA1671	KIAA1671 ortholog [Source:NCBI gene;Acc:102185023]	-0.699301	0.0113742	0.0299838	no
chi-miR-224-5p	ENSCHIT00000017575	mRNA	ENSCHIG00000012534	UNC5B	unc-5 netrin receptor B [Source:NCBI gene;Acc:102184034]	-0.643357	0.0240032	0.0507254	no
chi-miR-432-3p	ENSCHIT00000027449	mRNA	ENSCHIG00000018570	PRSS22	serine protease 22 [Source:NCBI gene;Acc:102174794]	-0.636364	0.0260969	0.0536812	no
chi-miR-105a	ENSCHIT00000038432	mRNA	ENSCHIG00000025211	KITLG	KIT ligand [Source:NCBI gene;Acc:100860807]	-0.874126	0.000200713	0.00307419	no
chi-miR-24-3p	ENSCHIT00000026837	mRNA	ENSCHIG00000018215		cationic amino acid transporter 3-like [Source:NCBI gene;Acc:102169897]	-0.887003	0.000119671	0.00233619	no
chi-miR-708-3p	ENSCHIT00000015605	mRNA	ENSCHIG00000011171	SPTB	spectrin beta, erythrocytic [Source:NCBI gene;Acc:102188225]	-0.72028	0.00823977	0.0240034	no
chi-miR-27a-5p	ENSCHIT00000028904	mRNA	ENSCHIG00000019507	CHST10	carbohydrate sulfotransferase 10 [Source:NCBI gene;Acc:102186023]	-0.867133	0.000259812	0.00349172	no
chi-miR-29b-5p	ENSCHIT00000000310	mRNA	ENSCHIG00000000206	ASXL3	ASXL transcriptional regulator 3 [Source:NCBI gene;Acc:102185524]	-0.629371	0.0283197	0.0569031	no
chi-miR-143-3p	ENSCHIT00000039031	mRNA	ENSCHIG00000025639	SV2B	synaptic vesicle glycoprotein 2B [Source:NCBI gene;Acc:102175332]	-0.797417	0.0018911	0.0103462	no
chi-miR-3955-5p	ENSCHIT00000018785	mRNA	ENSCHIG00000013313	OTOP2	otopetrin 2 [Source:NCBI gene;Acc:102176559]	-0.752674	0.00472788	0.0174375	no
chi-miR-221-3p	ENSCHIT00000000310	mRNA	ENSCHIG00000000206	ASXL3	ASXL transcriptional regulator 3 [Source:NCBI gene;Acc:102185524]	-0.811189	0.00136331	0.00845946	no
chi-miR-135a	ENSCHIT00000015497	mRNA	ENSCHIG00000011011	RIMS1	regulating synaptic membrane exocytosis 1 [Source:NCBI gene;Acc:102184538]	-0.591312	0.042868	0.0767918	no
chi-miR-29b-3p	ENSCHIT00000029901	mRNA	ENSCHIG00000020126	ABCA13	ATP binding cassette subfamily A member 13 [Source:NCBI gene;Acc:102182661]	-0.704026	0.0106018	0.0287848	no
chi-miR-485-5p	ENSCHIT00000014060	mRNA	ENSCHIG00000010218			-0.619908	0.0315405	0.0617436	no
chi-miR-133a-3p	ENSCHIT00000033274	mRNA	ENSCHIG00000022176	FREM2	FRAS1 related extracellular matrix protein 2 [Source:NCBI gene;Acc:102171617]	-0.58042	0.047856	0.0829136	no
chi-miR-29a-3p	ENSCHIT00000040048	mRNA	ENSCHIG00000026141	OBSCN	obscurin, cytoskeletal calmodulin and titin-interacting RhoGEF [Source:NCBI gene;Acc:106502252]	-0.762752	0.00391157	0.0162346	no
chi-miR-150	ENSCHIT00000000308	mRNA	ENSCHIG00000000205	PALD1	phosphatase domain containing paladin 1 [Source:NCBI gene;Acc:102170488]	-0.58042	0.047856	0.0829136	no
chi-miR-504	ENSCHIT00000035574	mRNA	ENSCHIG00000023519	FOXA1	forkhead box A1 [Source:NCBI gene;Acc:102171659]	-0.650213	0.0220714	0.0477097	no
chi-miR-134	ENSCHIT00000035454	mRNA	ENSCHIG00000023358	NBR1	NBR1, autophagy cargo receptor [Source:NCBI gene;Acc:102173601]	-0.640861	0.0247359	0.0520105	no
chi-miR-1197-3p	ENSCHIT00000035940	mRNA	ENSCHIG00000023742	SHANK2	SH3 and multiple ankyrin repeat domains 2 [Source:NCBI gene;Acc:102171308]	-0.653192	0.0212685	0.0469558	no
chi-miR-127-5p	ENSCHIT00000018395	mRNA	ENSCHIG00000013080		phylloquinone omega-hydroxylase CYP4F11-like [Source:NCBI gene;Acc:102181586]	-0.81545	0.00122559	0.00811473	no
chi-miR-296-3p	ENSCHIT00000033567	mRNA	ENSCHIG00000022255		SLIT-ROBO Rho GTPase activating protein 2 [Source:NCBI gene;Acc:102174862]	-0.629371	0.0283197	0.0569031	no
chi-miR-410-5p	ENSCHIT00000017842	mRNA	ENSCHIG00000012711	TMPRSS4	transmembrane serine protease 4 [Source:NCBI gene;Acc:102189225]	-0.601399	0.0385885	0.0708848	no
chi-miR-493-3p	ENSCHIT00000040435	mRNA	ENSCHIG00000026484	SLC27A4	solute carrier family 27 member 4 [Source:NCBI gene;Acc:102190047]	-0.671329	0.0168315	0.0396093	no
chi-miR-27b-5p	ENSCHIT00000022476	mRNA	ENSCHIG00000015485	CNTN3	contactin 3 [Source:NCBI gene;Acc:102188718]	-0.868653	0.000245942	0.00349172	no
chi-miR-493-3p	ENSCHIT00000039321	mRNA	ENSCHIG00000025768	SPTBN2	spectrin beta, non-erythrocytic 2 [Source:NCBI gene;Acc:102179357]	-0.858145	0.000354759	0.00414931	no
chi-miR-128-3p	ENSCHIT00000028107	mRNA	ENSCHIG00000018974	LRP2	LDL receptor related protein 2 [Source:NCBI gene;Acc:102190361]	-0.909091	4.19e-05	0.00132895	no
chi-miR-378-3p	ENSCHIT00000000285	mRNA	ENSCHIG00000000189	FAM83H	family with sequence similarity 83 member H [Source:NCBI gene;Acc:102182985]	-0.811189	0.00136331	0.00845946	no
chi-miR-329a-3p	ENSCHIT00000015277	mRNA	ENSCHIG00000011004	RERG	RAS like estrogen regulated growth inhibitor [Source:NCBI gene;Acc:100861243]	-0.93007	1.17e-05	0.000710365	no
chi-let-7g-3p	ENSCHIT00000038417	mRNA	ENSCHIG00000025267	GALNT17	polypeptide N-acetylgalactosaminyltransferase 17 [Source:NCBI gene;Acc:102174898]	-0.895105	8.37e-05	0.00191113	no
chi-miR-412-3p	ENSCHIT00000030385	mRNA	ENSCHIG00000020453	PNPLA1	patatin like phospholipase domain containing 1 [Source:NCBI gene;Acc:102189446]	-0.664336	0.0184527	0.0422524	no
chi-miR-378-3p	ENSCHIT00000016273	mRNA	ENSCHIG00000011674	C6orf15	chromosome 23 C6orf15 homolog [Source:NCBI gene;Acc:102189391]	-0.725137	0.00761729	0.0227305	no
chi-miR-532-3p	ENSCHIT00000036142	mRNA	ENSCHIG00000023750	ALS2	ALS2, alsin Rho guanine nucleotide exchange factor [Source:NCBI gene;Acc:102172771]	-0.818182	0.0011431	0.00771266	no
chi-miR-221-3p	ENSCHIT00000032503	mRNA	ENSCHIG00000021751	KLHL41	kelch like family member 41 [Source:NCBI gene;Acc:102173422]	-0.672505	0.0165693	0.0395741	no
chi-miR-193b-3p	ENSCHIT00000000331	mRNA	ENSCHIG00000000223	ELFN1	extracellular leucine rich repeat and fibronectin type III domain containing 1 [Source:NCBI gene;Acc:106503623]	-0.92983	1.19e-05	0.000720121	no
chi-miR-433	ENSCHIT00000038911	mRNA	ENSCHIG00000025559	FHAD1	forkhead associated phosphopeptide binding domain 1 [Source:NCBI gene;Acc:102175230]	-0.766828	0.00361379	0.0155807	no
chi-miR-135a	ENSCHIT00000038494	mRNA	ENSCHIG00000025298	RIN1	Ras and Rab interactor 1 [Source:NCBI gene;Acc:102177964]	-0.628229	0.028695	0.0575698	no
chi-miR-105b-5p	ENSCHIT00000008556	mRNA	ENSCHIG00000006414	TTC12	tetratricopeptide repeat domain 12 [Source:NCBI gene;Acc:102178641]	-0.664336	0.0184527	0.0422524	no
chi-miR-146b-5p	ENSCHIT00000035647	mRNA	ENSCHIG00000023553	SCN2A	sodium voltage-gated channel alpha subunit 2 [Source:NCBI gene;Acc:102180162]	-0.599347	0.0394333	0.0722963	no
chi-miR-24-3p	ENSCHIT00000037487	mRNA	ENSCHIG00000024660	APC	APC, WNT signaling pathway regulator [Source:NCBI gene;Acc:102184724]	-0.58042	0.047856	0.0829136	no
chi-miR-365-3p	ENSCHIT00000034211	mRNA	ENSCHIG00000022728	ESRRB	estrogen related receptor beta [Source:NCBI gene;Acc:102176243]	-0.717863	0.00856333	0.0247067	no
chi-miR-500-5p	ENSCHIT00000041070	mRNA	ENSCHIG00000026831	ARHGEF12	Rho guanine nucleotide exchange factor 12 [Source:NCBI gene;Acc:102179302]	-0.752674	0.00472788	0.0174375	no
chi-miR-362-5p	ENSCHIT00000036093	mRNA	ENSCHIG00000023823		galectin-7 [Source:NCBI gene;Acc:102180339]	-0.692308	0.012593	0.0322295	no
chi-miR-485-5p	ENSCHIT00000039850	mRNA	ENSCHIG00000026125	CDCP1	CUB domain containing protein 1 [Source:NCBI gene;Acc:102187276]	-0.704029	0.0106012	0.0287848	no
chi-miR-29a-3p	ENSCHIT00000031366	mRNA	ENSCHIG00000021041	CDO1	cysteine dioxygenase type 1 [Source:NCBI gene;Acc:102190230]	-0.59895	0.0395981	0.0724644	no
chi-miR-24-3p	ENSCHIT00000038287	mRNA	ENSCHIG00000025181	SOGA1	suppressor of glucose, autophagy associated 1 [Source:NCBI gene;Acc:102178288]	-0.867133	0.000259812	0.00349172	no
chi-miR-130b-5p	ENSCHIT00000019597	mRNA	ENSCHIG00000013836	SLC39A10	solute carrier family 39 member 10 [Source:NCBI gene;Acc:102191745]	-0.58042	0.047856	0.0829136	no
chi-miR-19b-5p	ENSCHIT00000040999	mRNA	ENSCHIG00000026804	ENTPD5	ectonucleoside triphosphate diphosphohydrolase 5 [Source:NCBI gene;Acc:102187956]	-0.776224	0.00299286	0.0137075	no
chi-miR-378-5p	ENSCHIT00000031835	mRNA	ENSCHIG00000021332	DDX17	DEAD-box helicase 17 [Source:NCBI gene;Acc:102183493]	-0.636364	0.0260969	0.0536812	no
chi-miR-493-3p	ENSCHIT00000026035	mRNA	ENSCHIG00000017750	ACP7	acid phosphatase 7, tartrate resistant (putative) [Source:NCBI gene;Acc:102181710]	-0.861648	0.000315007	0.00393286	no
chi-miR-3955-5p	ENSCHIT00000020452	mRNA	ENSCHIG00000014342	TTLL8	tubulin tyrosine ligase like 8 [Source:NCBI gene;Acc:106502162]	-0.666734	0.0178844	0.041736	no
chi-miR-34a	ENSCHIT00000011967	mRNA	ENSCHIG00000008569	TCF12	transcription factor 12 [Source:NCBI gene;Acc:102182876]	-0.818182	0.0011431	0.00771266	no
chi-miR-543-5p	ENSCHIT00000023311	mRNA	ENSCHIG00000016134	SERPINA12	serpin family A member 12 [Source:NCBI gene;Acc:102172943]	-0.605955	0.0367585	0.0686542	no
chi-miR-3955-5p	ENSCHIT00000040415	mRNA	ENSCHIG00000026477	BCL6	BCL6, transcription repressor [Source:NCBI gene;Acc:102169705]	-0.853147	0.000418118	0.00442648	no
chi-miR-224-5p	ENSCHIT00000030378	mRNA	ENSCHIG00000020445	RASSF6	Ras association domain family member 6 [Source:NCBI gene;Acc:102178158]	-0.86515	0.000278812	0.00364106	no
chi-miR-150	ENSCHIT00000022480	mRNA	ENSCHIG00000015608	ASPN	asporin [Source:NCBI gene;Acc:102168726]	-0.86014	0.000331668	0.00393286	no
chi-miR-433	ENSCHIT00000033281	mRNA	ENSCHIG00000022176	FREM2	FRAS1 related extracellular matrix protein 2 [Source:NCBI gene;Acc:102171617]	-0.602106	0.0383003	0.0708848	no
chi-miR-412-3p	ENSCHIT00000039850	mRNA	ENSCHIG00000026125	CDCP1	CUB domain containing protein 1 [Source:NCBI gene;Acc:102187276]	-0.693521	0.0123749	0.0322295	no
chi-miR-660	ENSCHIT00000030704	mRNA	ENSCHIG00000020623	PPFIBP2	PPFIA binding protein 2 [Source:NCBI gene;Acc:102187066]	-0.79021	0.00222314	0.0113699	no
chi-miR-432-5p	ENSCHIT00000021943	mRNA	ENSCHIG00000015296	GRAP2	GRB2 related adaptor protein 2 [Source:NCBI gene;Acc:102185639]	-0.657343	0.0201855	0.0449851	no
chi-miR-19b-5p	ENSCHIT00000040992	mRNA	ENSCHIG00000026804	ENTPD5	ectonucleoside triphosphate diphosphohydrolase 5 [Source:NCBI gene;Acc:102187956]	-0.839161	0.000642826	0.00565106	no
chi-miR-378-3p	ENSCHIT00000025717	mRNA	ENSCHIG00000017563	NOA1	nitric oxide associated 1 [Source:NCBI gene;Acc:102183860]	-0.888112	0.000114134	0.00224534	no
chi-miR-433	ENSCHIT00000019619	mRNA	ENSCHIG00000013843	STARD10	StAR related lipid transfer domain containing 10 [Source:NCBI gene;Acc:102179793]	-0.640982	0.0247	0.0520105	no
chi-miR-502b-3p	ENSCHIT00000041286	mRNA	ENSCHIG00000026990			-0.636364	0.0260969	0.0536812	no
chi-miR-184	ENSCHIT00000013622	mRNA	ENSCHIG00000009887	C1QTNF2	C1q and TNF related 2 [Source:NCBI gene;Acc:102182034]	-0.622874	0.030504	0.0602888	no
chi-miR-1306-3p	ENSCHIT00000039321	mRNA	ENSCHIG00000025768	SPTBN2	spectrin beta, non-erythrocytic 2 [Source:NCBI gene;Acc:102179357]	-0.679511	0.0150702	0.0368991	no
chi-miR-19b-5p	ENSCHIT00000023945	mRNA	ENSCHIG00000016498	DISP1	dispatched RND transporter family member 1 [Source:NCBI gene;Acc:102182522]	-0.685315	0.013906	0.0344654	no
chi-miR-193b-3p	ENSCHIT00000031045	mRNA	ENSCHIG00000020744	TNC	tenascin C [Source:NCBI gene;Acc:102179198]	-0.923077	1.86e-05	0.000857647	no
chi-miR-130b-5p	ENSCHIT00000007255	mRNA	ENSCHIG00000005363	SLC41A2	solute carrier family 41 member 2 [Source:NCBI gene;Acc:102184884]	-0.72028	0.00823977	0.0240034	no
chi-miR-128-3p	ENSCHIT00000033365	mRNA	ENSCHIG00000022245	CYP2S1	cytochrome P450 2S1 [Source:NCBI gene;Acc:102190811]	-0.727273	0.00735503	0.0224232	no
chi-miR-532-5p	ENSCHIT00000031901	mRNA	ENSCHIG00000021383	XKRX	XK related X-linked [Source:NCBI gene;Acc:102177781]	-0.818182	0.0011431	0.00771266	no
chi-miR-146b-5p	ENSCHIT00000035785	mRNA	ENSCHIG00000023614	FNDC1	fibronectin type III domain containing 1 [Source:NCBI gene;Acc:102170875]	-0.832168	0.000785442	0.00623472	no
chi-miR-378-3p	ENSCHIT00000019248	mRNA	ENSCHIG00000013604	MLPH	melanophilin [Source:NCBI gene;Acc:102169933]	-0.72028	0.00823977	0.0240034	no
chi-miR-211	ENSCHIT00000000191	mRNA	ENSCHIG00000000130		cytochrome P450 2D14 [Source:NCBI gene;Acc:102179192]	-0.623299	0.0303576	0.0602888	no
chi-miR-130b-5p	ENSCHIT00000029635	mRNA	ENSCHIG00000019924	DSG1	desmoglein 1 [Source:NCBI gene;Acc:102187728]	-0.678322	0.0153173	0.0368991	no
chi-miR-125b-5p	ENSCHIT00000016768	mRNA	ENSCHIG00000012025		AHNAK nucleoprotein 2 [Source:NCBI gene;Acc:102188806]	-0.63655	0.0260393	0.0536812	no
chi-miR-130b-3p	ENSCHIT00000016670	mRNA	ENSCHIG00000011933	PLEKHG1	pleckstrin homology and RhoGEF domain containing G1 [Source:NCBI gene;Acc:102188678]	-0.811189	0.00136331	0.00845946	no
chi-miR-105b-5p	ENSCHIT00000018380	mRNA	ENSCHIG00000012598	KDM5C	lysine demethylase 5C [Source:NCBI gene;Acc:102185641]	-0.624169	0.0300595	0.0599801	no
chi-miR-105b-5p	ENSCHIT00000018430	mRNA	ENSCHIG00000012598	KDM5C	lysine demethylase 5C [Source:NCBI gene;Acc:102185641]	-0.694797	0.0121486	0.031768	no
chi-miR-195-5p	ENSCHIT00000021267	mRNA	ENSCHIG00000014164	RYR1	ryanodine receptor 1 [Source:NCBI gene;Acc:102179229]	-0.839161	0.000642826	0.00565106	no
chi-miR-532-5p	ENSCHIT00000038626	mRNA	ENSCHIG00000025390	PROSER2	proline and serine rich 2 [Source:NCBI gene;Acc:102173099]	-0.847637	0.000497797	0.00507581	no
chi-let-7b-5p	ENSCHIT00000031338	mRNA	ENSCHIG00000020993	PLCE1	phospholipase C epsilon 1 [Source:NCBI gene;Acc:102178972]	-0.881119	0.000152674	0.00263758	no
chi-miR-493-3p	ENSCHIT00000019234	mRNA	ENSCHIG00000013593		probable ergosterol biosynthetic protein 28 [Source:NCBI gene;Acc:102188051]	-0.688121	0.0133675	0.0339142	no
chi-miR-146b-3p	ENSCHIT00000040123	mRNA	ENSCHIG00000026296	AKNA	AT-hook transcription factor [Source:NCBI gene;Acc:102177981]	-0.608392	0.035806	0.0671753	no
chi-miR-146b-3p	ENSCHIT00000040124	mRNA	ENSCHIG00000026275		diacylglycerol kinase iota [Source:NCBI gene;Acc:102175743]	-0.610253	0.0350902	0.0669043	no
chi-miR-128-3p	ENSCHIT00000028593	mRNA	ENSCHIG00000019310	EPHB1	EPH receptor B1 [Source:NCBI gene;Acc:102169225]	-0.671329	0.0168315	0.0396093	no
chi-miR-380-5p	ENSCHIT00000009292	mRNA	ENSCHIG00000006876	OGDH	oxoglutarate dehydrogenase [Source:NCBI gene;Acc:102183291]	-0.797203	0.00190037	0.0103462	no
chi-miR-376c-5p	ENSCHIT00000002651	mRNA	ENSCHIG00000001852	OCLN	occludin [Source:NCBI gene;Acc:102185782]	-0.832168	0.000785442	0.00623472	no
chi-miR-432-5p	ENSCHIT00000011523	mRNA	ENSCHIG00000008360	ECEL1	endothelin converting enzyme like 1 [Source:NCBI gene;Acc:102191476]	-0.734316	0.00653792	0.0208088	no
chi-miR-362-5p	ENSCHIT00000021480	mRNA	ENSCHIG00000014950	SPTBN1	spectrin beta, non-erythrocytic 1 [Source:NCBI gene;Acc:102185661]	-0.797203	0.00190037	0.0103462	no
chi-miR-196b	ENSCHIT00000015792	mRNA	ENSCHIG00000011345	IRF7	interferon regulatory factor 7 [Source:NCBI gene;Acc:106503773]	-0.608392	0.035806	0.0671753	no
chi-miR-127-3p	ENSCHIT00000025443	mRNA	ENSCHIG00000017356	PLCG2	phospholipase C gamma 2 [Source:NCBI gene;Acc:102180337]	-0.657343	0.0201855	0.0449851	no
chi-miR-767	ENSCHIT00000035940	mRNA	ENSCHIG00000023742	SHANK2	SH3 and multiple ankyrin repeat domains 2 [Source:NCBI gene;Acc:102171308]	-0.732241	0.00677118	0.0213651	no
chi-miR-432-3p	ENSCHIT00000037739	mRNA	ENSCHIG00000024827	GPR155	G protein-coupled receptor 155 [Source:NCBI gene;Acc:102182350]	-0.607427	0.036181	0.0677348	no
chi-miR-329a-5p	ENSCHIT00000012087	mRNA	ENSCHIG00000008573	ARNTL	aryl hydrocarbon receptor nuclear translocator like [Source:NCBI gene;Acc:102169495]	-0.652636	0.0214168	0.0472308	no
chi-miR-136-5p	ENSCHIT00000033862	mRNA	ENSCHIG00000022495	KCTD17	potassium channel tetramerization domain containing 17 [Source:NCBI gene;Acc:102178607]	-0.647234	0.0228964	0.0492356	no
chi-miR-29c-3p	ENSCHIT00000027055	mRNA	ENSCHIG00000018234	DNAH8	dynein axonemal heavy chain 8 [Source:NCBI gene;Acc:102185229]	-0.895003	8.41e-05	0.0019157	no
chi-miR-493-3p	ENSCHIT00000031922	mRNA	ENSCHIG00000021379	EPHA1	EPH receptor A1 [Source:NCBI gene;Acc:102183848]	-0.895105	8.37e-05	0.00191113	no
chi-miR-412-3p	ENSCHIT00000008980	mRNA	ENSCHIG00000006757	SERPINB7	serpin family B member 7 [Source:NCBI gene;Acc:102181089]	-0.585969	0.0452666	0.0798633	no
chi-miR-378-3p	ENSCHIT00000031420	mRNA	ENSCHIG00000021086			-0.725137	0.00761729	0.0227305	no
chi-miR-27a-3p	ENSCHIT00000021674	mRNA	ENSCHIG00000015019	MEGF8	multiple EGF like domains 8 [Source:NCBI gene;Acc:102177365]	-0.825175	0.000951363	0.00690982	no
chi-miR-338-3p	ENSCHIT00000033322	mRNA	ENSCHIG00000022188	ABAT	4-aminobutyrate aminotransferase [Source:NCBI gene;Acc:100861058]	-0.783217	0.00258622	0.0125455	no
chi-miR-105a	ENSCHIT00000019906	mRNA	ENSCHIG00000013942	ARHGEF28	Rho guanine nucleotide exchange factor 28 [Source:NCBI gene;Acc:102171549]	-0.647987	0.0226858	0.0488832	no
chi-miR-34c-5p	ENSCHIT00000013625	mRNA	ENSCHIG00000009900	CD207	CD207 molecule [Source:NCBI gene;Acc:102185368]	-0.641835	0.0244481	0.0515887	no
chi-miR-135a	ENSCHIT00000030205	mRNA	ENSCHIG00000020336	RASEF	RAS and EF-hand domain containing [Source:NCBI gene;Acc:102186118]	-0.642109	0.0243674	0.0514293	no
chi-let-7b-5p	ENSCHIT00000030010	mRNA	ENSCHIG00000020225	EMILIN1	elastin microfibril interfacer 1 [Source:NCBI gene;Acc:102180604]	-0.93007	1.17e-05	0.000710365	no
chi-miR-200a	ENSCHIT00000020791	mRNA	ENSCHIG00000014556	CNTNAP4	contactin associated protein like 4 [Source:NCBI gene;Acc:102178296]	-0.797203	0.00190037	0.0103462	no
chi-miR-378-5p	ENSCHIT00000014432	mRNA	ENSCHIG00000010459	EHF	ETS homologous factor [Source:NCBI gene;Acc:102170803]	-0.972028	1.29e-07	7.52e-05	no
chi-miR-127-5p	ENSCHIT00000020082	mRNA	ENSCHIG00000014093	ARAP2	ArfGAP with RhoGAP domain, ankyrin repeat and PH domain 2 [Source:NCBI gene;Acc:102187662]	-0.725137	0.00761729	0.0227305	no
chi-miR-378-3p	ENSCHIT00000027506	mRNA	ENSCHIG00000018615	GPRIN2	G protein regulated inducer of neurite outgrowth 2 [Source:NCBI gene;Acc:102174810]	-0.837129	0.000682001	0.00591167	no
chi-miR-708-5p	ENSCHIT00000014472	mRNA	ENSCHIG00000010241	PDE4DIP	phosphodiesterase 4D interacting protein [Source:NCBI gene;Acc:102171475]	-0.874814	0.000195525	0.00307419	no
chi-miR-214-3p	ENSCHIT00000011531	mRNA	ENSCHIG00000008360	ECEL1	endothelin converting enzyme like 1 [Source:NCBI gene;Acc:102191476]	-0.833052	0.000766174	0.00623472	no
chi-miR-758	ENSCHIT00000022251	mRNA	ENSCHIG00000015486	NIPAL2	NIPA like domain containing 2 [Source:NCBI gene;Acc:102179398]	-0.951049	2.04e-06	0.000293208	no
chi-miR-29a-3p	ENSCHIT00000024608	mRNA	ENSCHIG00000016914	HIVEP1	human immunodeficiency virus type I enhancer binding protein 1 [Source:NCBI gene;Acc:102187442]	-0.692308	0.012593	0.0322295	no
chi-miR-146b-5p	ENSCHIT00000014049	mRNA	ENSCHIG00000010205	PLCL2	phospholipase C like 2 [Source:NCBI gene;Acc:102183272]	-0.804196	0.00161477	0.00939149	no
chi-miR-362-5p	ENSCHIT00000032969	mRNA	ENSCHIG00000021978	CACNA1I	calcium voltage-gated channel subunit alpha1 I [Source:NCBI gene;Acc:102185724]	-0.734316	0.00653792	0.0208088	no
chi-miR-378-5p	ENSCHIT00000025324	mRNA	ENSCHIG00000017332	ANO9	anoctamin 9 [Source:NCBI gene;Acc:102187463]	-0.909091	4.19e-05	0.00132895	no
chi-miR-34c-5p	ENSCHIT00000035964	mRNA	ENSCHIG00000023751	NEBL	nebulette [Source:NCBI gene;Acc:106501793]	-0.776224	0.00299286	0.0137075	no
chi-miR-493-5p	ENSCHIT00000025625	mRNA	ENSCHIG00000017389	ATP2B2	ATPase plasma membrane Ca2+ transporting 2 [Source:NCBI gene;Acc:102187815]	-0.628229	0.028695	0.0575698	no
chi-miR-3958-3p	ENSCHIT00000022078	mRNA	ENSCHIG00000015373	KRT35	keratin 35 [Source:NCBI gene;Acc:102175327]	-0.668087	0.0175694	0.0410731	no
chi-miR-412-3p	ENSCHIT00000030971	mRNA	ENSCHIG00000020829	SDR16C5	epidermal retinol dehydrogenase 2 [Source:NCBI gene;Acc:102186703]	-0.769231	0.00344645	0.0150422	no
chi-miR-660	ENSCHIT00000028107	mRNA	ENSCHIG00000018974	LRP2	LDL receptor related protein 2 [Source:NCBI gene;Acc:102190361]	-0.909091	4.19e-05	0.00132895	no
chi-miR-20a-5p	ENSCHIT00000009001	mRNA	ENSCHIG00000006756	GDAP1	ganglioside induced differentiation associated protein 1 [Source:NCBI gene;Acc:102183527]	-0.797203	0.00190037	0.0103462	no
chi-miR-432-5p	ENSCHIT00000015419	mRNA	ENSCHIG00000011108	RTKN2	rhotekin 2 [Source:NCBI gene;Acc:102174092]	-0.774082	0.00312666	0.0141861	no
chi-miR-141	ENSCHIT00000029066	mRNA	ENSCHIG00000019577	CUBN	cubilin [Source:NCBI gene;Acc:102180405]	-0.721542	0.00807444	0.0239435	no
chi-miR-143-3p	ENSCHIT00000020818	mRNA	ENSCHIG00000014597	TRAM2	translocation associated membrane protein 2 [Source:NCBI gene;Acc:102186353]	-0.776224	0.00299286	0.0137075	no
chi-miR-376e-5p	ENSCHIT00000035734	mRNA	ENSCHIG00000023605	ASCC3	activating signal cointegrator 1 complex subunit 3 [Source:NCBI gene;Acc:102185088]	-0.699301	0.0113742	0.0299838	no
chi-miR-502b-3p	ENSCHIT00000028983	mRNA	ENSCHIG00000019551	GTPBP10	GTP binding protein 10 [Source:NCBI gene;Acc:102179629]	-0.727273	0.00735503	0.0224232	no
chi-miR-432-5p	ENSCHIT00000014230	mRNA	ENSCHIG00000010332	FOSL2	FOS like 2, AP-1 transcription factor subunit [Source:NCBI gene;Acc:102171522]	-0.839161	0.000642826	0.00565106	no
chi-miR-671-3p	ENSCHIT00000000584	mRNA	ENSCHIG00000000391	ZNF236	zinc finger protein 236 [Source:NCBI gene;Acc:102178589]	-0.589477	0.0436813	0.0780865	no
chi-miR-141	ENSCHIT00000023758	mRNA	ENSCHIG00000016385	ZEB1	zinc finger E-box binding homeobox 1 [Source:NCBI gene;Acc:106502734]	-0.944056	3.93e-06	0.000389781	no
chi-let-7g-3p	ENSCHIT00000030289	mRNA	ENSCHIG00000020386	TACR3	tachykinin receptor 3 [Source:NCBI gene;Acc:102168518]	-0.711285	0.00949192	0.0265672	no
chi-miR-1306-3p	ENSCHIT00000001771	mRNA	ENSCHIG00000001109	EFHD1	EF-hand domain family member D1 [Source:NCBI gene;Acc:102170382]	-0.587413	0.0446093	0.0788368	no
chi-miR-376e-3p	ENSCHIT00000036885	mRNA	ENSCHIG00000024307	GALNT3	polypeptide N-acetylgalactosaminyltransferase 3 [Source:NCBI gene;Acc:102179608]	-0.881119	0.000152674	0.00263758	no
chi-miR-497-5p	ENSCHIT00000026507	mRNA	ENSCHIG00000018000	CACNA1H	voltage-dependent T-type calcium channel subunit alpha-1H [Source:NCBI gene;Acc:102177581]	-0.909091	4.19e-05	0.00132895	no
chi-miR-154b-5p	ENSCHIT00000011094	mRNA	ENSCHIG00000008065	FAM84A	family with sequence similarity 84 member A [Source:NCBI gene;Acc:108637159]	-0.762238	0.00395045	0.0162346	no
chi-miR-532-3p	ENSCHIT00000012294	mRNA	ENSCHIG00000008887	CD9	CD9 molecule [Source:NCBI gene;Acc:100860808]	-0.972028	1.29e-07	7.52e-05	no
chi-miR-34c-5p	ENSCHIT00000019166	mRNA	ENSCHIG00000013404	SPTAN1	spectrin alpha, non-erythrocytic 1 [Source:NCBI gene;Acc:102176892]	-0.895105	8.37e-05	0.00191113	no
chi-miR-532-3p	ENSCHIT00000024756	mRNA	ENSCHIG00000016957	CCDC88C	coiled-coil domain containing 88C [Source:NCBI gene;Acc:102182348]	-0.79021	0.00222314	0.0113699	no
chi-miR-410-5p	ENSCHIT00000028836	mRNA	ENSCHIG00000019460	BPIFB6	BPI fold containing family B member 6 [Source:NCBI gene;Acc:102188782]	-0.691861	0.0126741	0.0324285	no
chi-miR-130b-5p	ENSCHIT00000024051	mRNA	ENSCHIG00000016544	PPT2	palmitoyl-protein thioesterase 2 [Source:NCBI gene;Acc:102173897]	-0.825175	0.000951363	0.00690982	no
chi-miR-3431-3p	ENSCHIT00000029481	mRNA	ENSCHIG00000019892	OAS1	2'-5'-oligoadenylate synthase 1 [Source:NCBI gene;Acc:102190983]	-0.601399	0.0385885	0.0708848	no
chi-miR-1185-3p	ENSCHIT00000012510	mRNA	ENSCHIG00000009100		cytochrome P450 3A28 [Source:NCBI gene;Acc:102191297]	-0.704029	0.0106012	0.0287848	no
chi-miR-433	ENSCHIT00000031914	mRNA	ENSCHIG00000021379	EPHA1	EPH receptor A1 [Source:NCBI gene;Acc:102183848]	-0.755245	0.00450843	0.0174375	no
chi-miR-145-5p	ENSCHIT00000018129	mRNA	ENSCHIG00000012903	RFTN2	raftlin family member 2 [Source:NCBI gene;Acc:102173340]	-0.629371	0.0283197	0.0569031	no
chi-let-7b-5p	ENSCHIT00000039669	mRNA	ENSCHIG00000026005	DPYSL5	dihydropyrimidinase like 5 [Source:NCBI gene;Acc:102186490]	-0.713287	0.00920178	0.0258316	no
chi-miR-105b-5p	ENSCHIT00000003033	mRNA	ENSCHIG00000001357	OTOGL	otogelin like [Source:NCBI gene;Acc:102187192]	-0.602453	0.0381595	0.0708848	no
chi-miR-1197-3p	ENSCHIT00000032006	mRNA	ENSCHIG00000021453	LARGE2	LARGE xylosyl- and glucuronyltransferase 2 [Source:NCBI gene;Acc:102183620]	-0.894388	8.65e-05	0.0019613	no
chi-miR-500-3p	ENSCHIT00000018121	mRNA	ENSCHIG00000012868	HECW2	HECT, C2 and WW domain containing E3 ubiquitin protein ligase 2 [Source:NCBI gene;Acc:102169918]	-0.748608	0.00509129	0.0182641	no
chi-miR-382-5p	ENSCHIT00000039415	mRNA	ENSCHIG00000025842	PPP1R13L	protein phosphatase 1 regulatory subunit 13 like [Source:NCBI gene;Acc:102188344]	-0.685315	0.013906	0.0344654	no
chi-miR-93-5p	ENSCHIT00000020637	mRNA	ENSCHIG00000014469	GATA5	GATA binding protein 5 [Source:NCBI gene;Acc:102171528]	-0.787522	0.00235775	0.0118485	no
chi-miR-708-5p	ENSCHIT00000025084	mRNA	ENSCHIG00000017197	NYNRIN	NYN domain and retroviral integrase containing [Source:NCBI gene;Acc:102177167]	-0.622378	0.0306759	0.0602888	no
chi-miR-23b-3p	ENSCHIT00000028377	mRNA	ENSCHIG00000019062	COL12A1	collagen type XII alpha 1 chain [Source:NCBI gene;Acc:102188405]	-0.797203	0.00190037	0.0103462	no
chi-miR-193a	ENSCHIT00000038062	mRNA	ENSCHIG00000024973	ADGRB2	adhesion G protein-coupled receptor B2 [Source:NCBI gene;Acc:102172582]	-0.818182	0.0011431	0.00771266	no
chi-miR-127-5p	ENSCHIT00000029210	mRNA	ENSCHIG00000019707	FAM83B	family with sequence similarity 83 member B [Source:NCBI gene;Acc:102184012]	-0.685315	0.013906	0.0344654	no
chi-miR-500-5p	ENSCHIT00000038648	mRNA	ENSCHIG00000025333	KIF21A	kinesin family member 21A [Source:NCBI gene;Acc:102189737]	-0.72028	0.00823977	0.0240034	no
chi-miR-432-5p	ENSCHIT00000023711	mRNA	ENSCHIG00000016389			-0.833626	0.000753851	0.00623472	no
chi-miR-188-5p	ENSCHIT00000021943	mRNA	ENSCHIG00000015296	GRAP2	GRB2 related adaptor protein 2 [Source:NCBI gene;Acc:102185639]	-0.65035	0.0220342	0.0476499	no
chi-miR-532-3p	ENSCHIT00000027501	mRNA	ENSCHIG00000018610	ALOX15B	arachidonate 15-lipoxygenase B [Source:NCBI gene;Acc:102169702]	-0.867133	0.000259812	0.00349172	no
chi-miR-433	ENSCHIT00000025651	mRNA	ENSCHIG00000017191	ATP1A1	ATPase Na+/K+ transporting subunit alpha 1 [Source:NCBI gene;Acc:102183561]	-0.861648	0.000315007	0.00393286	no
chi-miR-378-3p	ENSCHIT00000035711	mRNA	ENSCHIG00000023586	VDR	vitamin D receptor [Source:NCBI gene;Acc:102177594]	-0.937063	6.99e-06	0.000521858	no
chi-miR-433	ENSCHIT00000037072	mRNA	ENSCHIG00000024433	MREG	melanoregulin [Source:NCBI gene;Acc:102174610]	-0.706294	0.0102452	0.0279658	no
chi-miR-708-5p	ENSCHIT00000022684	mRNA	ENSCHIG00000015719	ZNF536	zinc finger protein 536 [Source:NCBI gene;Acc:102184464]	-0.622378	0.0306759	0.0602888	no
chi-let-7b-5p	ENSCHIT00000000257	mRNA	ENSCHIG00000000170	ELF4	E74 like ETS transcription factor 4 [Source:NCBI gene;Acc:102175752]	-0.636364	0.0260969	0.0536812	no
chi-miR-19b-5p	ENSCHIT00000036320	mRNA	ENSCHIG00000023973	LRRC25	leucine rich repeat containing 25 [Source:NCBI gene;Acc:102169852]	-0.699301	0.0113742	0.0299838	no
chi-miR-146b-5p	ENSCHIT00000015584	mRNA	ENSCHIG00000011217	AK1	adenylate kinase 1 [Source:NCBI gene;Acc:102169601]	-0.741259	0.00580115	0.0197721	no
chi-miR-127-5p	ENSCHIT00000020148	mRNA	ENSCHIG00000014093	ARAP2	ArfGAP with RhoGAP domain, ankyrin repeat and PH domain 2 [Source:NCBI gene;Acc:102187662]	-0.857787	0.00035903	0.00414931	no
chi-miR-410-5p	ENSCHIT00000020849	mRNA	ENSCHIG00000014573	CDC14A	cell division cycle 14A [Source:NCBI gene;Acc:102176004]	-0.616463	0.032776	0.0636096	no
chi-miR-502b-3p	ENSCHIT00000039321	mRNA	ENSCHIG00000025768	SPTBN2	spectrin beta, non-erythrocytic 2 [Source:NCBI gene;Acc:102179357]	-0.875658	0.000189298	0.00307419	no
chi-miR-432-3p	ENSCHIT00000035925	mRNA	ENSCHIG00000023698	SESN2	sestrin 2 [Source:NCBI gene;Acc:102175632]	-0.591312	0.042868	0.0767918	no
chi-miR-145-5p	ENSCHIT00000000205	mRNA	ENSCHIG00000000138	ZNF521	zinc finger protein 521 [Source:NCBI gene;Acc:102188552]	-0.65035	0.0220342	0.0476499	no
chi-miR-29b-5p	ENSCHIT00000033516	mRNA	ENSCHIG00000022333	LMX1A	LIM homeobox transcription factor 1 alpha [Source:NCBI gene;Acc:102181114]	-0.615385	0.0331699	0.0636096	no
chi-miR-504	ENSCHIT00000037463	mRNA	ENSCHIG00000024666	NEU2	neuraminidase 2 [Source:NCBI gene;Acc:102188734]	-0.655032	0.0207834	0.0460228	no
chi-miR-93-5p	ENSCHIT00000020859	mRNA	ENSCHIG00000014613	KCNQ4	potassium voltage-gated channel subfamily Q member 4 [Source:NCBI gene;Acc:102185975]	-0.609458	0.0353946	0.0671753	no
chi-miR-195-5p	ENSCHIT00000026381	mRNA	ENSCHIG00000017905		nodal modulator 1 [Source:NCBI gene;Acc:102178324]	-0.748252	0.00512408	0.0182641	no
chi-miR-378-3p	ENSCHIT00000024015	mRNA	ENSCHIG00000016541		inhibitor of carbonic anhydrase [Source:NCBI gene;Acc:102172488]	-0.734266	0.00654349	0.0208088	no
chi-miR-34a	ENSCHIT00000019531	mRNA	ENSCHIG00000013768	C11orf49	chromosome 15 C11orf49 homolog [Source:NCBI gene;Acc:102170896]	-0.664336	0.0184527	0.0422524	no
chi-miR-380-5p	ENSCHIT00000006681	mRNA	ENSCHIG00000004808	HRAS	HRas proto-oncogene, GTPase [Source:NCBI gene;Acc:102186668]	-0.643357	0.0240032	0.0507254	no
chi-miR-27a-3p	ENSCHIT00000023402	mRNA	ENSCHIG00000016116	CAMSAP1	calmodulin regulated spectrin associated protein 1 [Source:NCBI gene;Acc:106502666]	-0.625668	0.0295504	0.0590473	no
chi-miR-502b-3p	ENSCHIT00000019621	mRNA	ENSCHIG00000013835	PLEKHG6	pleckstrin homology and RhoGEF domain containing G6 [Source:NCBI gene;Acc:102178252]	-0.937063	6.99e-06	0.000521858	no
chi-miR-432-5p	ENSCHIT00000029055	mRNA	ENSCHIG00000019587	FLT1	fms related tyrosine kinase 1 [Source:NCBI gene;Acc:100860837]	-0.622378	0.0306759	0.0602888	no
chi-miR-502b-3p	ENSCHIT00000038052	mRNA	ENSCHIG00000025038	GATA3	GATA binding protein 3 [Source:NCBI gene;Acc:102172821]	-0.951049	2.04e-06	0.000293208	no
chi-miR-532-3p	ENSCHIT00000015800	mRNA	ENSCHIG00000011355	PON3	paraoxonase 3 [Source:NCBI gene;Acc:102189455]	-0.86014	0.000331668	0.00393286	no
chi-miR-383	ENSCHIT00000015532	mRNA	ENSCHIG00000011142	ATP13A5	ATPase 13A5 [Source:NCBI gene;Acc:102186435]	-0.752674	0.00472788	0.0174375	no
chi-miR-412-3p	ENSCHIT00000000044	mRNA	ENSCHIG00000000043		phosphatidylinositol specific phospholipase C X domain containing 1 [Source:NCBI gene;Acc:102177150]	-0.840632	0.000615569	0.00565106	no
chi-miR-665	ENSCHIT00000015231	mRNA	ENSCHIG00000010960	ZP2	zona pellucida glycoprotein 2 [Source:NCBI gene;Acc:102189816]	-0.836431	0.000695873	0.00602402	no
chi-miR-660	ENSCHIT00000003721	mRNA	ENSCHIG00000002575	DGAT2L6	diacylglycerol O-acyltransferase 2 like 6 [Source:NCBI gene;Acc:102175936]	-0.794648	0.00201382	0.0107661	no
chi-let-7g-3p	ENSCHIT00000020502	mRNA	ENSCHIG00000014281	NEB	nebulin [Source:NCBI gene;Acc:102180806]	-0.678322	0.0153173	0.0368991	no
chi-miR-20a-5p	ENSCHIT00000032468	mRNA	ENSCHIG00000021724	ADAMTS15	ADAM metallopeptidase with thrombospondin type 1 motif 15 [Source:NCBI gene;Acc:102187842]	-0.86014	0.000331668	0.00393286	no
chi-miR-432-5p	ENSCHIT00000019502	mRNA	ENSCHIG00000013732	RBBP6	RB binding protein 6, ubiquitin ligase [Source:NCBI gene;Acc:102172681]	-0.727273	0.00735503	0.0224232	no
chi-miR-493-3p	ENSCHIT00000009828	mRNA	ENSCHIG00000007119	JARID2	jumonji and AT-rich interaction domain containing 2 [Source:NCBI gene;Acc:102184681]	-0.901111	6.3e-05	0.00165302	no
chi-miR-143-3p	ENSCHIT00000041227	mRNA	ENSCHIG00000026942	2023-09-09	septin 9 [Source:NCBI gene;Acc:102181234]	-0.853147	0.000418118	0.00442648	no
chi-miR-195-3p	ENSCHIT00000033135	mRNA	ENSCHIG00000022104	CFAP69	cilia and flagella associated protein 69 [Source:NCBI gene;Acc:102179161]	-0.627032	0.0290927	0.0582904	no
chi-miR-362-5p	ENSCHIT00000040402	mRNA	ENSCHIG00000026468	MMP7	matrix metallopeptidase 7 [Source:NCBI gene;Acc:102173210]	-0.7986	0.00184042	0.0103462	no
chi-miR-410-5p	ENSCHIT00000029759	mRNA	ENSCHIG00000020062	ADGRG1	adhesion G protein-coupled receptor G1 [Source:NCBI gene;Acc:102171366]	-0.825175	0.000951363	0.00690982	no
chi-miR-493-3p	ENSCHIT00000007749	mRNA	ENSCHIG00000005813	VSIR	V-set immunoregulatory receptor [Source:NCBI gene;Acc:102175186]	-0.818182	0.0011431	0.00771266	no
chi-miR-3431-3p	ENSCHIT00000027941	mRNA	ENSCHIG00000018776	ARHGAP21	Rho GTPase activating protein 21 [Source:NCBI gene;Acc:102170885]	-0.690158	0.0129864	0.0330361	no
chi-miR-34b-3p	ENSCHIT00000039236	mRNA	ENSCHIG00000025560	RAPGEF2	Rap guanine nucleotide exchange factor 2 [Source:NCBI gene;Acc:102187973]	-0.769231	0.00344645	0.0150422	no
chi-miR-100-3p	ENSCHIT00000039321	mRNA	ENSCHIG00000025768	SPTBN2	spectrin beta, non-erythrocytic 2 [Source:NCBI gene;Acc:102179357]	-0.669003	0.0173586	0.0406091	no
chi-miR-24-3p	ENSCHIT00000031062	mRNA	ENSCHIG00000020744	TNC	tenascin C [Source:NCBI gene;Acc:102179198]	-0.923077	1.86e-05	0.000857647	no
chi-miR-383	ENSCHIT00000023977	mRNA	ENSCHIG00000016491	MTUS1	microtubule associated scaffold protein 1 [Source:NCBI gene;Acc:102168885]	-0.879161	0.000165104	0.00279873	no
chi-miR-224-5p	ENSCHIT00000010182	mRNA	ENSCHIG00000007458	MAP7D2	MAP7 domain containing 2 [Source:NCBI gene;Acc:102185909]	-0.791254	0.00217245	0.0113699	no
chi-miR-93-5p	ENSCHIT00000038299	mRNA	ENSCHIG00000025163	GSE1	Gse1 coiled-coil protein [Source:NCBI gene;Acc:102183352]	-0.679511	0.0150702	0.0368991	no
chi-let-7b-5p	ENSCHIT00000020791	mRNA	ENSCHIG00000014556	CNTNAP4	contactin associated protein like 4 [Source:NCBI gene;Acc:102178296]	-0.734266	0.00654349	0.0208088	no
chi-miR-146b-5p	ENSCHIT00000013180	mRNA	ENSCHIG00000009529	DAB2	DAB2, clathrin adaptor protein [Source:NCBI gene;Acc:102191558]	-0.713287	0.00920178	0.0258316	no
chi-miR-34c-5p	ENSCHIT00000023342	mRNA	ENSCHIG00000016144	USP54	ubiquitin specific peptidase 54 [Source:NCBI gene;Acc:102184785]	-0.692308	0.012593	0.0322295	no
chi-miR-500-5p	ENSCHIT00000026435	mRNA	ENSCHIG00000017963	FGFR2	fibroblast growth factor receptor 2 [Source:NCBI gene;Acc:102170938]	-0.727273	0.00735503	0.0224232	no
chi-miR-143-3p	ENSCHIT00000037179	mRNA	ENSCHIG00000024502	XXYLT1	xyloside xylosyltransferase 1 [Source:NCBI gene;Acc:102181630]	-0.755245	0.00450843	0.0174375	no
chi-miR-487b-3p	ENSCHIT00000023111	mRNA	ENSCHIG00000015996	ESYT3	extended synaptotagmin 3 [Source:NCBI gene;Acc:102168582]	-0.91769	2.59e-05	0.00111082	no
chi-miR-429	ENSCHIT00000031339	mRNA	ENSCHIG00000021007	P4HA2	prolyl 4-hydroxylase subunit alpha-2 [Source:NCBI gene;Acc:102189116]	-0.748252	0.00512408	0.0182641	no
chi-miR-130b-3p	ENSCHIT00000016674	mRNA	ENSCHIG00000011933	PLEKHG1	pleckstrin homology and RhoGEF domain containing G1 [Source:NCBI gene;Acc:102188678]	-0.721542	0.00807444	0.0239435	no
chi-miR-532-5p	ENSCHIT00000022406	mRNA	ENSCHIG00000015580	RNF39	ring finger protein 39 [Source:NCBI gene;Acc:102171828]	-0.905269	5.12e-05	0.00156218	no
chi-miR-412-5p	ENSCHIT00000014725	mRNA	ENSCHIG00000010626	TBL1XR1	transducin beta like 1 X-linked receptor 1 [Source:NCBI gene;Acc:102170182]	-0.783217	0.00258622	0.0125455	no
chi-miR-17-5p	ENSCHIT00000025146	mRNA	ENSCHIG00000017229	HAVCR2	hepatitis A virus cellular receptor 2 [Source:NCBI gene;Acc:102175678]	-0.58083	0.047661	0.0829136	no
chi-miR-125b-5p	ENSCHIT00000017749	mRNA	ENSCHIG00000012657		BOLA class I histocompatibility antigen, alpha chain BL3-7-like [Source:NCBI gene;Acc:102169753]	-0.767076	0.00359618	0.0155115	no
chi-miR-154b-5p	ENSCHIT00000032006	mRNA	ENSCHIG00000021453	LARGE2	LARGE xylosyl- and glucuronyltransferase 2 [Source:NCBI gene;Acc:102183620]	-0.915516	2.94e-05	0.00112566	no
[truncated: 3,472 more rows]
